# Supplementary material for: Identification of a vacuolar proton channel that triggers the bioluminescent flash in dinoflagellates
Source: PLoS One. 2017 Feb 8;12(2):e0171594. doi: 10.1371/journal.pone.0171594 (PMC5298346; doi:10.1371/journal.pone.0171594)
Supplement: S2 Table — Tabs show assignments of proteins from two independent scintillon preparations. Samples shown in ‘MS results 1’ tab were initially treated with 100 ng trypsin at 30°C; those in ‘MS results 2’ tab were initially treated with 100 ng trypsin at 50°C at high pressure using the PBI Barocyler (Pressure Biocsciences Inc.) according to manufacturer’s protocol. (XLSX) [file pone.0171594.s002.xlsx]

## Sheet: MS results 1
entry no.	protein	description	protein probability	percent coverage	num unique peps	tot indep spectra	protein length	peptide sequence
1	sp|Q42813|RBL2_LINPO	Ribulose 1,5-bisphosphate carboxylase, chloroplastic (Fragment) OS=Lingulodinium polyedrum GN=rbcL PE=1 SV=2	1	73.3	47	49	557	AGTYGDVSLSDGVIEYAK
1	sp|Q42813|RBL2_LINPO	Ribulose 1,5-bisphosphate carboxylase, chloroplastic (Fragment) OS=Lingulodinium polyedrum GN=rbcL PE=1 SV=2	1	73.3	47	49	557	DM[147]TDGGLVVGTIIKPK
1	sp|Q42813|RBL2_LINPO	Ribulose 1,5-bisphosphate carboxylase, chloroplastic (Fragment) OS=Lingulodinium polyedrum GN=rbcL PE=1 SV=2	1	73.3	47	49	557	GAFLTFQK
1	sp|Q42813|RBL2_LINPO	Ribulose 1,5-bisphosphate carboxylase, chloroplastic (Fragment) OS=Lingulodinium polyedrum GN=rbcL PE=1 SV=2	1	73.3	47	49	557	GYTAFVHTK
1	sp|Q42813|RBL2_LINPO	Ribulose 1,5-bisphosphate carboxylase, chloroplastic (Fragment) OS=Lingulodinium polyedrum GN=rbcL PE=1 SV=2	1	73.3	47	49	557	IAYPVPLFDR
1	sp|Q42813|RBL2_LINPO	Ribulose 1,5-bisphosphate carboxylase, chloroplastic (Fragment) OS=Lingulodinium polyedrum GN=rbcL PE=1 SV=2	1	73.3	47	49	557	IYDIYFPPSYLR
1	sp|Q42813|RBL2_LINPO	Ribulose 1,5-bisphosphate carboxylase, chloroplastic (Fragment) OS=Lingulodinium polyedrum GN=rbcL PE=1 SV=2	1	73.3	47	49	557	ALDQSSRYADLSLTEEDLVKNG
1	sp|Q42813|RBL2_LINPO	Ribulose 1,5-bisphosphate carboxylase, chloroplastic (Fragment) OS=Lingulodinium polyedrum GN=rbcL PE=1 SV=2	1	73.3	47	49	557	DGGLVVGTIIKPK
1	sp|Q42813|RBL2_LINPO	Ribulose 1,5-bisphosphate carboxylase, chloroplastic (Fragment) OS=Lingulodinium polyedrum GN=rbcL PE=1 SV=2	1	73.3	47	49	557	DMTDGGLVVGTIIKPK
1	sp|Q42813|RBL2_LINPO	Ribulose 1,5-bisphosphate carboxylase, chloroplastic (Fragment) OS=Lingulodinium polyedrum GN=rbcL PE=1 SV=2	1	73.3	47	49	557	DM[147]TDGGLVVGTIIKPK
1	sp|Q42813|RBL2_LINPO	Ribulose 1,5-bisphosphate carboxylase, chloroplastic (Fragment) OS=Lingulodinium polyedrum GN=rbcL PE=1 SV=2	1	73.3	47	49	557	SIGNNQGM[147]GDVEYGKIYDIYFPPSYLR
1	sp|Q42813|RBL2_LINPO	Ribulose 1,5-bisphosphate carboxylase, chloroplastic (Fragment) OS=Lingulodinium polyedrum GN=rbcL PE=1 SV=2	1	73.3	47	49	557	VGTM[147]SFGKM[147]VGDASDK
1	sp|Q42813|RBL2_LINPO	Ribulose 1,5-bisphosphate carboxylase, chloroplastic (Fragment) OS=Lingulodinium polyedrum GN=rbcL PE=1 SV=2	1	73.3	47	49	557	VIGASGIHVGTMSFGKMVGDASDKGIAYMLQQDAAGGPYYHQK
1	sp|Q42813|RBL2_LINPO	Ribulose 1,5-bisphosphate carboxylase, chloroplastic (Fragment) OS=Lingulodinium polyedrum GN=rbcL PE=1 SV=2	1	73.3	47	49	557	KAAAAAFVGAQA
1	sp|Q42813|RBL2_LINPO	Ribulose 1,5-bisphosphate carboxylase, chloroplastic (Fragment) OS=Lingulodinium polyedrum GN=rbcL PE=1 SV=2	1	73.3	47	49	557	TVDALVYYIDPENEEM[147]KIAYPVP
1	sp|Q42813|RBL2_LINPO	Ribulose 1,5-bisphosphate carboxylase, chloroplastic (Fragment) OS=Lingulodinium polyedrum GN=rbcL PE=1 SV=2	1	73.3	47	49	557	DGPACSILDMWR
1	sp|Q42813|RBL2_LINPO	Ribulose 1,5-bisphosphate carboxylase, chloroplastic (Fragment) OS=Lingulodinium polyedrum GN=rbcL PE=1 SV=2	1	73.3	47	49	557	WEGVVQTTPIISGGM[147]NALRLPAFFENLGHSNVIL
1	sp|Q42813|RBL2_LINPO	Ribulose 1,5-bisphosphate carboxylase, chloroplastic (Fragment) OS=Lingulodinium polyedrum GN=rbcL PE=1 SV=2	1	73.3	47	49	557	VIGASGIHVGTM[147]SFGKM[147]
1	sp|Q42813|RBL2_LINPO	Ribulose 1,5-bisphosphate carboxylase, chloroplastic (Fragment) OS=Lingulodinium polyedrum GN=rbcL PE=1 SV=2	1	73.3	47	49	557	IAYPVPLFDRNITDGRAM[147]M[147]CSVLTLSIGNNQGMGDVEY
1	sp|Q42813|RBL2_LINPO	Ribulose 1,5-bisphosphate carboxylase, chloroplastic (Fragment) OS=Lingulodinium polyedrum GN=rbcL PE=1 SV=2	1	73.3	47	49	557	FDRNITDGRAM[147]MCSVLTLSIGNNQGM[147]GDVEYGK
1	sp|Q42813|RBL2_LINPO	Ribulose 1,5-bisphosphate carboxylase, chloroplastic (Fragment) OS=Lingulodinium polyedrum GN=rbcL PE=1 SV=2	1	73.3	47	49	557	TAGGGTFGHKDGPK
1	sp|Q42813|RBL2_LINPO	Ribulose 1,5-bisphosphate carboxylase, chloroplastic (Fragment) OS=Lingulodinium polyedrum GN=rbcL PE=1 SV=2	1	73.3	47	49	557	PACSILDMWRILGR
2	LpHV1	HV1 proton channel of Lingulodinium polyedrum	1	59.6	24	24	333	APRPWSGLGAAGAEAAPSPGRR
2	LpHV1	HV1 proton channel of Lingulodinium polyedrum	1	59.6	24	24	333	RLDAPRPWSGLGAAGA
2	LpHV1	HV1 proton channel of Lingulodinium polyedrum	1	59.6	24	24	333	WAHM[147]SGEKWEAMLLR
2	LpHV1	HV1 proton channel of Lingulodinium polyedrum	1	59.6	24	24	333	SGLGAAGAEAAPSPGRR
2	LpHV1	HV1 proton channel of Lingulodinium polyedrum	1	59.6	24	24	333	VWAHM[147]SGEKWEAMLLR
2	LpHV1	HV1 proton channel of Lingulodinium polyedrum	1	59.6	24	24	333	LFLAGHDAGR
2	LpHV1	HV1 proton channel of Lingulodinium polyedrum	1	59.6	24	24	333	LEM[147]DVAKEEQR
2	LpHV1	HV1 proton channel of Lingulodinium polyedrum	1	59.6	24	24	333	LDAPRPWSGLGAAGAEAAP
2	LpHV1	HV1 proton channel of Lingulodinium polyedrum	1	59.6	24	24	333	AADAEASSGGGLFLAGHDAGR
3	tr|A3QSS0|A3QSS0_LINPO	Chloroplast sedoheptulose-1,7-bisphosphatase OS=Lingulodinium polyedrum GN=SBP PE=2 SV=1	1	66	46	50	434	DKYDSIEEVM[147]EK
3	tr|A3QSS0|A3QSS0_LINPO	Chloroplast sedoheptulose-1,7-bisphosphatase OS=Lingulodinium polyedrum GN=SBP PE=2 SV=1	1	66	46	50	434	DLLWDLAK
3	tr|A3QSS0|A3QSS0_LINPO	Chloroplast sedoheptulose-1,7-bisphosphatase OS=Lingulodinium polyedrum GN=SBP PE=2 SV=1	1	66	46	50	434	DQVMSLVALYGPR
3	tr|A3QSS0|A3QSS0_LINPO	Chloroplast sedoheptulose-1,7-bisphosphatase OS=Lingulodinium polyedrum GN=SBP PE=2 SV=1	1	66	46	50	434	DQVM[147]SLVALYGPR
3	tr|A3QSS0|A3QSS0_LINPO	Chloroplast sedoheptulose-1,7-bisphosphatase OS=Lingulodinium polyedrum GN=SBP PE=2 SV=1	1	66	46	50	434	LAFEAAPFGR
3	tr|A3QSS0|A3QSS0_LINPO	Chloroplast sedoheptulose-1,7-bisphosphatase OS=Lingulodinium polyedrum GN=SBP PE=2 SV=1	1	66	46	50	434	IFAPANMR
3	tr|A3QSS0|A3QSS0_LINPO	Chloroplast sedoheptulose-1,7-bisphosphatase OS=Lingulodinium polyedrum GN=SBP PE=2 SV=1	1	66	46	50	434	LVCEASSEEEPEIVK
3	tr|A3QSS0|A3QSS0_LINPO	Chloroplast sedoheptulose-1,7-bisphosphatase OS=Lingulodinium polyedrum GN=SBP PE=2 SV=1	1	66	46	50	434	QPARLRAGSGGAPASAAQ
3	tr|A3QSS0|A3QSS0_LINPO	Chloroplast sedoheptulose-1,7-bisphosphatase OS=Lingulodinium polyedrum GN=SBP PE=2 SV=1	1	66	46	50	434	SSQLVCEASSEEEPEIVK
3	tr|A3QSS0|A3QSS0_LINPO	Chloroplast sedoheptulose-1,7-bisphosphatase OS=Lingulodinium polyedrum GN=SBP PE=2 SV=1	1	66	46	50	434	STGLLGATGR
3	tr|A3QSS0|A3QSS0_LINPO	Chloroplast sedoheptulose-1,7-bisphosphatase OS=Lingulodinium polyedrum GN=SBP PE=2 SV=1	1	66	46	50	434	TALAIGSANEVDR
3	tr|A3QSS0|A3QSS0_LINPO	Chloroplast sedoheptulose-1,7-bisphosphatase OS=Lingulodinium polyedrum GN=SBP PE=2 SV=1	1	66	46	50	434	TQGVFTNPTSK
3	tr|A3QSS0|A3QSS0_LINPO	Chloroplast sedoheptulose-1,7-bisphosphatase OS=Lingulodinium polyedrum GN=SBP PE=2 SV=1	1	66	46	50	434	TSDGVSGQSVLDVK
3	tr|A3QSS0|A3QSS0_LINPO	Chloroplast sedoheptulose-1,7-bisphosphatase OS=Lingulodinium polyedrum GN=SBP PE=2 SV=1	1	66	46	50	434	YSGGLVPDVCQQFTK
3	tr|A3QSS0|A3QSS0_LINPO	Chloroplast sedoheptulose-1,7-bisphosphatase OS=Lingulodinium polyedrum GN=SBP PE=2 SV=1	1	66	46	50	434	AGPLSFLAPGLGR
3	tr|A3QSS0|A3QSS0_LINPO	Chloroplast sedoheptulose-1,7-bisphosphatase OS=Lingulodinium polyedrum GN=SBP PE=2 SV=1	1	66	46	50	434	GVYEFTLGPGNQWICSR
3	tr|A3QSS0|A3QSS0_LINPO	Chloroplast sedoheptulose-1,7-bisphosphatase OS=Lingulodinium polyedrum GN=SBP PE=2 SV=1	1	66	46	50	434	LIDHYMTNR
3	tr|A3QSS0|A3QSS0_LINPO	Chloroplast sedoheptulose-1,7-bisphosphatase OS=Lingulodinium polyedrum GN=SBP PE=2 SV=1	1	66	46	50	434	PLSFLAPGLGR
3	tr|A3QSS0|A3QSS0_LINPO	Chloroplast sedoheptulose-1,7-bisphosphatase OS=Lingulodinium polyedrum GN=SBP PE=2 SV=1	1	66	46	50	434	QPARLRAGSGGAPASAAQGAVQAERPGA
3	tr|A3QSS0|A3QSS0_LINPO	Chloroplast sedoheptulose-1,7-bisphosphatase OS=Lingulodinium polyedrum GN=SBP PE=2 SV=1	1	66	46	50	434	SSQLVCEASSEEEPEIVK
3	tr|A3QSS0|A3QSS0_LINPO	Chloroplast sedoheptulose-1,7-bisphosphatase OS=Lingulodinium polyedrum GN=SBP PE=2 SV=1	1	66	46	50	434	AGSGGAPASAAQGAVQAERPGAGCLAAG
3	tr|A3QSS0|A3QSS0_LINPO	Chloroplast sedoheptulose-1,7-bisphosphatase OS=Lingulodinium polyedrum GN=SBP PE=2 SV=1	1	66	46	50	434	LLAACVKITEALR
3	tr|A3QSS0|A3QSS0_LINPO	Chloroplast sedoheptulose-1,7-bisphosphatase OS=Lingulodinium polyedrum GN=SBP PE=2 SV=1	1	66	46	50	434	STGLLGATGRDQVM[147]SLVAL
3	tr|A3QSS0|A3QSS0_LINPO	Chloroplast sedoheptulose-1,7-bisphosphatase OS=Lingulodinium polyedrum GN=SBP PE=2 SV=1	1	66	46	50	434	LRAGSGGAPASAAQGAVQ
3	tr|A3QSS0|A3QSS0_LINPO	Chloroplast sedoheptulose-1,7-bisphosphatase OS=Lingulodinium polyedrum GN=SBP PE=2 SV=1	1	66	46	50	434	NMRAAQEVDGYAK
3	tr|A3QSS0|A3QSS0_LINPO	Chloroplast sedoheptulose-1,7-bisphosphatase OS=Lingulodinium polyedrum GN=SBP PE=2 SV=1	1	66	46	50	434	VCQQFTKTQGVFTNPTSK
3	tr|A3QSS0|A3QSS0_LINPO	Chloroplast sedoheptulose-1,7-bisphosphatase OS=Lingulodinium polyedrum GN=SBP PE=2 SV=1	1	66	46	50	434	LIDHYMTNRYTLRY
3	tr|A3QSS0|A3QSS0_LINPO	Chloroplast sedoheptulose-1,7-bisphosphatase OS=Lingulodinium polyedrum GN=SBP PE=2 SV=1	1	66	46	50	434	FAPANM[147]RAAQEVDGYAK
4	tr|A3QSS6|A3QSS6_LINPO	Chloroplast fructose-1,6-bisphosphatase (Fragment) OS=Lingulodinium polyedrum GN=FBP PE=2 SV=1	1	62.3	25	26	356	LGTLASEEEDSPVLGSFETR
4	tr|A3QSS6|A3QSS6_LINPO	Chloroplast fructose-1,6-bisphosphatase (Fragment) OS=Lingulodinium polyedrum GN=FBP PE=2 SV=1	1	62.3	25	26	356	LLYEAAPM[147]SFILEQAGGK
4	tr|A3QSS6|A3QSS6_LINPO	Chloroplast fructose-1,6-bisphosphatase (Fragment) OS=Lingulodinium polyedrum GN=FBP PE=2 SV=1	1	62.3	25	26	356	SRVMDIPPAAVHQR
4	tr|A3QSS6|A3QSS6_LINPO	Chloroplast fructose-1,6-bisphosphatase (Fragment) OS=Lingulodinium polyedrum GN=FBP PE=2 SV=1	1	62.3	25	26	356	VPVILGSKDDVEECQK
4	tr|A3QSS6|A3QSS6_LINPO	Chloroplast fructose-1,6-bisphosphatase (Fragment) OS=Lingulodinium polyedrum GN=FBP PE=2 SV=1	1	62.3	25	26	356	YEAAPMSFILEQAGGK
4	tr|A3QSS6|A3QSS6_LINPO	Chloroplast fructose-1,6-bisphosphatase (Fragment) OS=Lingulodinium polyedrum GN=FBP PE=2 SV=1	1	62.3	25	26	356	YEAAPM[147]SFILEQAGGK
4	tr|A3QSS6|A3QSS6_LINPO	Chloroplast fructose-1,6-bisphosphatase (Fragment) OS=Lingulodinium polyedrum GN=FBP PE=2 SV=1	1	62.3	25	26	356	YIGSM[147]VGDVHR
4	tr|A3QSS6|A3QSS6_LINPO	Chloroplast fructose-1,6-bisphosphatase (Fragment) OS=Lingulodinium polyedrum GN=FBP PE=2 SV=1	1	62.3	25	26	356	IFAYPADSKNKDGK
4	tr|A3QSS6|A3QSS6_LINPO	Chloroplast fructose-1,6-bisphosphatase (Fragment) OS=Lingulodinium polyedrum GN=FBP PE=2 SV=1	1	62.3	25	26	356	ILEQAGGKAITGFSR
4	tr|A3QSS6|A3QSS6_LINPO	Chloroplast fructose-1,6-bisphosphatase (Fragment) OS=Lingulodinium polyedrum GN=FBP PE=2 SV=1	1	62.3	25	26	356	SFILEQAGGK
4	tr|A3QSS6|A3QSS6_LINPO	Chloroplast fructose-1,6-bisphosphatase (Fragment) OS=Lingulodinium polyedrum GN=FBP PE=2 SV=1	1	62.3	25	26	356	VM[147]DIPPAAVHQR
4	tr|A3QSS6|A3QSS6_LINPO	Chloroplast fructose-1,6-bisphosphatase (Fragment) OS=Lingulodinium polyedrum GN=FBP PE=2 SV=1	1	62.3	25	26	356	VPVILGSKDDVEECQK
4	tr|A3QSS6|A3QSS6_LINPO	Chloroplast fructose-1,6-bisphosphatase (Fragment) OS=Lingulodinium polyedrum GN=FBP PE=2 SV=1	1	62.3	25	26	356	IYSMNEANVEEWDEPM[147]KR
4	tr|A3QSS6|A3QSS6_LINPO	Chloroplast fructose-1,6-bisphosphatase (Fragment) OS=Lingulodinium polyedrum GN=FBP PE=2 SV=1	1	62.3	25	26	356	LGSFETRGDDGQVISR
4	tr|A3QSS6|A3QSS6_LINPO	Chloroplast fructose-1,6-bisphosphatase (Fragment) OS=Lingulodinium polyedrum GN=FBP PE=2 SV=1	1	62.3	25	26	356	APMSFILEQAGGK
4	tr|A3QSS6|A3QSS6_LINPO	Chloroplast fructose-1,6-bisphosphatase (Fragment) OS=Lingulodinium polyedrum GN=FBP PE=2 SV=1	1	62.3	25	26	356	EAAPMSFILEQAGGK
5	tr|A5H0L6|A5H0L6_LINPO	AAA (Fragment) OS=Lingulodinium polyedrum PE=2 SV=1	1	58.5	38	38	667	GRSRLVPVGTTLNR
5	tr|A5H0L6|A5H0L6_LINPO	AAA (Fragment) OS=Lingulodinium polyedrum PE=2 SV=1	1	58.5	38	38	667	ASTLHDESGGLCGLTLHVGCAVL
5	tr|A5H0L6|A5H0L6_LINPO	AAA (Fragment) OS=Lingulodinium polyedrum PE=2 SV=1	1	58.5	38	38	667	LQGRGSDVSTTSSDPALPGVRPTSGLCQNPVSEAK
5	tr|A5H0L6|A5H0L6_LINPO	AAA (Fragment) OS=Lingulodinium polyedrum PE=2 SV=1	1	58.5	38	38	667	VSEADLSETM[147]RRLR
5	tr|A5H0L6|A5H0L6_LINPO	AAA (Fragment) OS=Lingulodinium polyedrum PE=2 SV=1	1	58.5	38	38	667	PTGSGKTTVTRDVAR
5	tr|A5H0L6|A5H0L6_LINPO	AAA (Fragment) OS=Lingulodinium polyedrum PE=2 SV=1	1	58.5	38	38	667	PTEAEHSLTPCQGHHR
5	tr|A5H0L6|A5H0L6_LINPO	AAA (Fragment) OS=Lingulodinium polyedrum PE=2 SV=1	1	58.5	38	38	667	EADLSETM[147]RRLR
5	tr|A5H0L6|A5H0L6_LINPO	AAA (Fragment) OS=Lingulodinium polyedrum PE=2 SV=1	1	58.5	38	38	667	LAREHGACLVASAVGDFRSM[147]AQ
5	tr|A5H0L6|A5H0L6_LINPO	AAA (Fragment) OS=Lingulodinium polyedrum PE=2 SV=1	1	58.5	38	38	667	LAREHGACLVASAVGDFRSMAQAGVWGTPGTGQQSWGGLS
5	tr|A5H0L6|A5H0L6_LINPO	AAA (Fragment) OS=Lingulodinium polyedrum PE=2 SV=1	1	58.5	38	38	667	VVVVDGMAVQSLISASR
5	tr|A5H0L6|A5H0L6_LINPO	AAA (Fragment) OS=Lingulodinium polyedrum PE=2 SV=1	1	58.5	38	38	667	AVEEAILSHAAEVVVVDGM[147]AVQSLISASRLAR
5	tr|A5H0L6|A5H0L6_LINPO	AAA (Fragment) OS=Lingulodinium polyedrum PE=2 SV=1	1	58.5	38	38	667	LCCAGSTASPMHNATPSLQGRGSDVSTTSSDPALPGVRP
5	tr|A5H0L6|A5H0L6_LINPO	AAA (Fragment) OS=Lingulodinium polyedrum PE=2 SV=1	1	58.5	38	38	667	SMAQAGVWGTPGTGQQSW
6	tr|A5XB30|A5XB30_LINPO	Glucose-6-phosphate isomerase OS=Lingulodinium polyedrum GN=GPI PE=2 SV=1	1	76.8	43	45	557	FAQPDALALGK
6	tr|A5XB30|A5XB30_LINPO	Glucose-6-phosphate isomerase OS=Lingulodinium polyedrum GN=GPI PE=2 SV=1	1	76.8	43	45	557	VVQQFLEGAHVM[147]DEHFR
6	tr|A5XB30|A5XB30_LINPO	Glucose-6-phosphate isomerase OS=Lingulodinium polyedrum GN=GPI PE=2 SV=1	1	76.8	43	45	557	CIPKHVVACSTALDK
6	tr|A5XB30|A5XB30_LINPO	Glucose-6-phosphate isomerase OS=Lingulodinium polyedrum GN=GPI PE=2 SV=1	1	76.8	43	45	557	VQM[147]DGTVVPVGTGAIYFGEPGTNGQHSFYQL
6	tr|A5XB30|A5XB30_LINPO	Glucose-6-phosphate isomerase OS=Lingulodinium polyedrum GN=GPI PE=2 SV=1	1	76.8	43	45	557	MASAQAWSELSAAASKMKATH
6	tr|A5XB30|A5XB30_LINPO	Glucose-6-phosphate isomerase OS=Lingulodinium polyedrum GN=GPI PE=2 SV=1	1	76.8	43	45	557	FTTAETMLNAKTVK
6	tr|A5XB30|A5XB30_LINPO	Glucose-6-phosphate isomerase OS=Lingulodinium polyedrum GN=GPI PE=2 SV=1	1	76.8	43	45	557	LFSLAEK
6	tr|A5XB30|A5XB30_LINPO	Glucose-6-phosphate isomerase OS=Lingulodinium polyedrum GN=GPI PE=2 SV=1	1	76.8	43	45	557	QKM[147]FAGERINETEGRPV
6	tr|A5XB30|A5XB30_LINPO	Glucose-6-phosphate isomerase OS=Lingulodinium polyedrum GN=GPI PE=2 SV=1	1	76.8	43	45	557	ALGKTADELKAEGVPEK
6	tr|A5XB30|A5XB30_LINPO	Glucose-6-phosphate isomerase OS=Lingulodinium polyedrum GN=GPI PE=2 SV=1	1	76.8	43	45	557	KTFTTAETMLNAK
6	tr|A5XB30|A5XB30_LINPO	Glucose-6-phosphate isomerase OS=Lingulodinium polyedrum GN=GPI PE=2 SV=1	1	76.8	43	45	557	MASAQAWSELSAAASKMKATH
6	tr|A5XB30|A5XB30_LINPO	Glucose-6-phosphate isomerase OS=Lingulodinium polyedrum GN=GPI PE=2 SV=1	1	76.8	43	45	557	TLLQDQARNDYM[147]YVKCGGMT
6	tr|A5XB30|A5XB30_LINPO	Glucose-6-phosphate isomerase OS=Lingulodinium polyedrum GN=GPI PE=2 SV=1	1	76.8	43	45	557	ELSAAASKM[147]K
7	tr|A7UC72|A7UC72_LINPO	Delta carbonic anhydrase 1 (Fragment) OS=Lingulodinium polyedrum GN=ca1 PE=2 SV=1	1	50.3	14	15	291	YTGSTTGTSR
7	tr|A7UC72|A7UC72_LINPO	Delta carbonic anhydrase 1 (Fragment) OS=Lingulodinium polyedrum GN=ca1 PE=2 SV=1	1	50.3	14	15	291	YTPITWQVDR
7	tr|A7UC72|A7UC72_LINPO	Delta carbonic anhydrase 1 (Fragment) OS=Lingulodinium polyedrum GN=ca1 PE=2 SV=1	1	50.3	14	15	291	YTPITWQVDRK
7	tr|A7UC72|A7UC72_LINPO	Delta carbonic anhydrase 1 (Fragment) OS=Lingulodinium polyedrum GN=ca1 PE=2 SV=1	1	50.3	14	15	291	GSTTGTSRSNEVCSR
7	tr|A7UC72|A7UC72_LINPO	Delta carbonic anhydrase 1 (Fragment) OS=Lingulodinium polyedrum GN=ca1 PE=2 SV=1	1	50.3	14	15	291	KCHLISASSFDK
7	tr|A7UC72|A7UC72_LINPO	Delta carbonic anhydrase 1 (Fragment) OS=Lingulodinium polyedrum GN=ca1 PE=2 SV=1	1	50.3	14	15	291	QAGANVTRGYRGGLDAGGR
7	tr|A7UC72|A7UC72_LINPO	Delta carbonic anhydrase 1 (Fragment) OS=Lingulodinium polyedrum GN=ca1 PE=2 SV=1	1	50.3	14	15	291	LVADNLAANNLVRR
7	tr|A7UC72|A7UC72_LINPO	Delta carbonic anhydrase 1 (Fragment) OS=Lingulodinium polyedrum GN=ca1 PE=2 SV=1	1	50.3	14	15	291	EDDEGEADSRRLAK
7	tr|A7UC72|A7UC72_LINPO	Delta carbonic anhydrase 1 (Fragment) OS=Lingulodinium polyedrum GN=ca1 PE=2 SV=1	1	50.3	14	15	291	ADNLAANNLVRR
7	tr|A7UC72|A7UC72_LINPO	Delta carbonic anhydrase 1 (Fragment) OS=Lingulodinium polyedrum GN=ca1 PE=2 SV=1	1	50.3	14	15	291	GGLDAGGRVPITTSYLEAGL
7	tr|A7UC72|A7UC72_LINPO	Delta carbonic anhydrase 1 (Fragment) OS=Lingulodinium polyedrum GN=ca1 PE=2 SV=1	1	50.3	14	15	291	AAGACGTPYQYQTPFYDGVFCM[147]DGIISLAPLNTYQK
8	tr|A7UC73|A7UC73_LINPO	Delta carbonic anhydrase 2 OS=Lingulodinium polyedrum GN=ca2 PE=2 SV=1	1	63.2	37	39	445	GMIVDGHYGQDIAK
8	tr|A7UC73|A7UC73_LINPO	Delta carbonic anhydrase 2 OS=Lingulodinium polyedrum GN=ca2 PE=2 SV=1	1	63.2	37	39	445	GM[147]IVDGHYGQDIAK
8	tr|A7UC73|A7UC73_LINPO	Delta carbonic anhydrase 2 OS=Lingulodinium polyedrum GN=ca2 PE=2 SV=1	1	63.2	37	39	445	TIVNDETYYYPEMIK
8	tr|A7UC73|A7UC73_LINPO	Delta carbonic anhydrase 2 OS=Lingulodinium polyedrum GN=ca2 PE=2 SV=1	1	63.2	37	39	445	TIVNDETYYYPEM[147]IK
8	tr|A7UC73|A7UC73_LINPO	Delta carbonic anhydrase 2 OS=Lingulodinium polyedrum GN=ca2 PE=2 SV=1	1	63.2	37	39	445	YTGSTTGTSR
8	tr|A7UC73|A7UC73_LINPO	Delta carbonic anhydrase 2 OS=Lingulodinium polyedrum GN=ca2 PE=2 SV=1	1	63.2	37	39	445	YTPITWQVDR
8	tr|A7UC73|A7UC73_LINPO	Delta carbonic anhydrase 2 OS=Lingulodinium polyedrum GN=ca2 PE=2 SV=1	1	63.2	37	39	445	YTPITWQVDRK
8	tr|A7UC73|A7UC73_LINPO	Delta carbonic anhydrase 2 OS=Lingulodinium polyedrum GN=ca2 PE=2 SV=1	1	63.2	37	39	445	AAAAGTSGPSTCGAVKDM[147]YK
8	tr|A7UC73|A7UC73_LINPO	Delta carbonic anhydrase 2 OS=Lingulodinium polyedrum GN=ca2 PE=2 SV=1	1	63.2	37	39	445	GM[147]IVDGHYGQDIAK
8	tr|A7UC73|A7UC73_LINPO	Delta carbonic anhydrase 2 OS=Lingulodinium polyedrum GN=ca2 PE=2 SV=1	1	63.2	37	39	445	KCHLISASSFDK
8	tr|A7UC73|A7UC73_LINPO	Delta carbonic anhydrase 2 OS=Lingulodinium polyedrum GN=ca2 PE=2 SV=1	1	63.2	37	39	445	LGYRGRLDASSR
8	tr|A7UC73|A7UC73_LINPO	Delta carbonic anhydrase 2 OS=Lingulodinium polyedrum GN=ca2 PE=2 SV=1	1	63.2	37	39	445	VDRNFTGNNFHR
8	tr|A7UC73|A7UC73_LINPO	Delta carbonic anhydrase 2 OS=Lingulodinium polyedrum GN=ca2 PE=2 SV=1	1	63.2	37	39	445	M[147]VARLMLAASV
8	tr|A7UC73|A7UC73_LINPO	Delta carbonic anhydrase 2 OS=Lingulodinium polyedrum GN=ca2 PE=2 SV=1	1	63.2	37	39	445	GAVKDMYKEQGCCGRPDK
8	tr|A7UC73|A7UC73_LINPO	Delta carbonic anhydrase 2 OS=Lingulodinium polyedrum GN=ca2 PE=2 SV=1	1	63.2	37	39	445	YDAKDAKFTTEYNWQ
8	tr|A7UC73|A7UC73_LINPO	Delta carbonic anhydrase 2 OS=Lingulodinium polyedrum GN=ca2 PE=2 SV=1	1	63.2	37	39	445	MIKGMIVDGHYGQDIAK
8	tr|A7UC73|A7UC73_LINPO	Delta carbonic anhydrase 2 OS=Lingulodinium polyedrum GN=ca2 PE=2 SV=1	1	63.2	37	39	445	CSKYDAKDAK
8	tr|A7UC73|A7UC73_LINPO	Delta carbonic anhydrase 2 OS=Lingulodinium polyedrum GN=ca2 PE=2 SV=1	1	63.2	37	39	445	YMKIGVQSQVYTIVNDETYYYPEM[147]IK
9	tr|D8UXL7|D8UXL7_LINPO	Cellulase OS=Lingulodinium polyedrum PE=2 SV=1	1	77.2	36	36	482	KMGEALDRGMVLVMSLWDDSQVNMLWLDAA
9	tr|D8UXL7|D8UXL7_LINPO	Cellulase OS=Lingulodinium polyedrum PE=2 SV=1	1	77.2	36	36	482	MDEFGGAGRHGNNR
9	tr|D8UXL7|D8UXL7_LINPO	Cellulase OS=Lingulodinium polyedrum PE=2 SV=1	1	77.2	36	36	482	FIHGEANSLNWN
9	tr|D8UXL7|D8UXL7_LINPO	Cellulase OS=Lingulodinium polyedrum PE=2 SV=1	1	77.2	36	36	482	SITLDANWRWIHNK
9	tr|D8UXL7|D8UXL7_LINPO	Cellulase OS=Lingulodinium polyedrum PE=2 SV=1	1	77.2	36	36	482	LLCLLGVAVAQQA
9	tr|D8UXL7|D8UXL7_LINPO	Cellulase OS=Lingulodinium polyedrum PE=2 SV=1	1	77.2	36	36	482	VERGPRM[147]PLK
9	tr|D8UXL7|D8UXL7_LINPO	Cellulase OS=Lingulodinium polyedrum PE=2 SV=1	1	77.2	36	36	482	YYGAGADFTVDTTKPM[147]TLVTQFLTADGTDSGDLSEIR
9	tr|D8UXL7|D8UXL7_LINPO	Cellulase OS=Lingulodinium polyedrum PE=2 SV=1	1	77.2	36	36	482	ATAYTPHPCNTVGVER
9	tr|D8UXL7|D8UXL7_LINPO	Cellulase OS=Lingulodinium polyedrum PE=2 SV=1	1	77.2	36	36	482	KFSNIAVGEIGSTVASAR
9	tr|D8UXL7|D8UXL7_LINPO	Cellulase OS=Lingulodinium polyedrum PE=2 SV=1	1	77.2	36	36	482	ERYQDASVKFSNIAVGE
9	tr|D8UXL7|D8UXL7_LINPO	Cellulase OS=Lingulodinium polyedrum PE=2 SV=1	1	77.2	36	36	482	VEM[147]DEFGGAGRHGNNRAGAK
9	tr|D8UXL7|D8UXL7_LINPO	Cellulase OS=Lingulodinium polyedrum PE=2 SV=1	1	77.2	36	36	482	VAQQAGTNEVERGPR
9	tr|D8UXL7|D8UXL7_LINPO	Cellulase OS=Lingulodinium polyedrum PE=2 SV=1	1	77.2	36	36	482	PCGLNGAVYFVEMDEFGGAGR
9	tr|D8UXL7|D8UXL7_LINPO	Cellulase OS=Lingulodinium polyedrum PE=2 SV=1	1	77.2	36	36	482	GLNGAVYFVEMDEFGGAGR
10	tr|E6Y2P0|E6Y2P0_LINPO	Putative mitochondrial ADP/ATP translocase OS=Lingulodinium polyedrum PE=2 SV=1	1	68.1	29	29	310	YFPTQALNF
10	tr|E6Y2P0|E6Y2P0_LINPO	Putative mitochondrial ADP/ATP translocase OS=Lingulodinium polyedrum PE=2 SV=1	1	68.1	29	29	310	YFPTQALNFAFK
10	tr|E6Y2P0|E6Y2P0_LINPO	Putative mitochondrial ADP/ATP translocase OS=Lingulodinium polyedrum PE=2 SV=1	1	68.1	29	29	310	AMLLSKDAPVWQSWM[147]VAQV
10	tr|E6Y2P0|E6Y2P0_LINPO	Putative mitochondrial ADP/ATP translocase OS=Lingulodinium polyedrum PE=2 SV=1	1	68.1	29	29	310	GIVSYPFDTVRR
10	tr|E6Y2P0|E6Y2P0_LINPO	Putative mitochondrial ADP/ATP translocase OS=Lingulodinium polyedrum PE=2 SV=1	1	68.1	29	29	310	STLDCWRKIVAEEGPG
10	tr|E6Y2P0|E6Y2P0_LINPO	Putative mitochondrial ADP/ATP translocase OS=Lingulodinium polyedrum PE=2 SV=1	1	68.1	29	29	310	VIAEQGVVSLWRG
10	tr|E6Y2P0|E6Y2P0_LINPO	Putative mitochondrial ADP/ATP translocase OS=Lingulodinium polyedrum PE=2 SV=1	1	68.1	29	29	310	KSGGAM[147]SFIKDLAA
10	tr|E6Y2P0|E6Y2P0_LINPO	Putative mitochondrial ADP/ATP translocase OS=Lingulodinium polyedrum PE=2 SV=1	1	68.1	29	29	310	IVAEEGPGAFFKGAGSN
10	tr|E6Y2P0|E6Y2P0_LINPO	Putative mitochondrial ADP/ATP translocase OS=Lingulodinium polyedrum PE=2 SV=1	1	68.1	29	29	310	SGGAM[147]SFIKDLAAGGVAGGISKTV
10	tr|E6Y2P0|E6Y2P0_LINPO	Putative mitochondrial ADP/ATP translocase OS=Lingulodinium polyedrum PE=2 SV=1	1	68.1	29	29	310	EQQYSGIVNCFSRVI
11	tr|O00941|O00941_LINPO	Peridinin-chlorophyll a-binding protein PCP OS=Lingulodinium polyedrum PE=4 SV=1	1	83.7	68	70	382	ADWDSVNAALGR
11	tr|O00941|O00941_LINPO	Peridinin-chlorophyll a-binding protein PCP OS=Lingulodinium polyedrum PE=4 SV=1	1	83.7	68	70	382	KLGDSSYAFAK
11	tr|O00941|O00941_LINPO	Peridinin-chlorophyll a-binding protein PCP OS=Lingulodinium polyedrum PE=4 SV=1	1	83.7	68	70	382	KLSEQSYPFLK
11	tr|O00941|O00941_LINPO	Peridinin-chlorophyll a-binding protein PCP OS=Lingulodinium polyedrum PE=4 SV=1	1	83.7	68	70	382	LGDSSYAFAK
11	tr|O00941|O00941_LINPO	Peridinin-chlorophyll a-binding protein PCP OS=Lingulodinium polyedrum PE=4 SV=1	1	83.7	68	70	382	LSEQSYPFLK
11	tr|O00941|O00941_LINPO	Peridinin-chlorophyll a-binding protein PCP OS=Lingulodinium polyedrum PE=4 SV=1	1	83.7	68	70	382	M[147]IVMGVQADPK
11	tr|O00941|O00941_LINPO	Peridinin-chlorophyll a-binding protein PCP OS=Lingulodinium polyedrum PE=4 SV=1	1	83.7	68	70	382	SQVSTAAAPPTVSASGDAIGEAAK
11	tr|O00941|O00941_LINPO	Peridinin-chlorophyll a-binding protein PCP OS=Lingulodinium polyedrum PE=4 SV=1	1	83.7	68	70	382	WNNGIFLQAPGK
11	tr|O00941|O00941_LINPO	Peridinin-chlorophyll a-binding protein PCP OS=Lingulodinium polyedrum PE=4 SV=1	1	83.7	68	70	382	AIAIDKMIMMGAKADG
11	tr|O00941|O00941_LINPO	Peridinin-chlorophyll a-binding protein PCP OS=Lingulodinium polyedrum PE=4 SV=1	1	83.7	68	70	382	FQPLEALKAIDK
11	tr|O00941|O00941_LINPO	Peridinin-chlorophyll a-binding protein PCP OS=Lingulodinium polyedrum PE=4 SV=1	1	83.7	68	70	382	FQPLEALKAIDKM
11	tr|O00941|O00941_LINPO	Peridinin-chlorophyll a-binding protein PCP OS=Lingulodinium polyedrum PE=4 SV=1	1	83.7	68	70	382	KLGDSSYAFAK
11	tr|O00941|O00941_LINPO	Peridinin-chlorophyll a-binding protein PCP OS=Lingulodinium polyedrum PE=4 SV=1	1	83.7	68	70	382	MIMM[147]GAKADGNLLKAAA
11	tr|O00941|O00941_LINPO	Peridinin-chlorophyll a-binding protein PCP OS=Lingulodinium polyedrum PE=4 SV=1	1	83.7	68	70	382	RSQVSTAAAPPTVSASGDAIGEAAK
11	tr|O00941|O00941_LINPO	Peridinin-chlorophyll a-binding protein PCP OS=Lingulodinium polyedrum PE=4 SV=1	1	83.7	68	70	382	SQVSTAAAPPTVSASGDAIGEAAK
11	tr|O00941|O00941_LINPO	Peridinin-chlorophyll a-binding protein PCP OS=Lingulodinium polyedrum PE=4 SV=1	1	83.7	68	70	382	SQVSTAAAPPTVSASGDAIGEAAKK
11	tr|O00941|O00941_LINPO	Peridinin-chlorophyll a-binding protein PCP OS=Lingulodinium polyedrum PE=4 SV=1	1	83.7	68	70	382	VM[147]GVQADPKLLK
11	tr|O00941|O00941_LINPO	Peridinin-chlorophyll a-binding protein PCP OS=Lingulodinium polyedrum PE=4 SV=1	1	83.7	68	70	382	VVASVPKKMVM[147]DVYNSM[147]ASLVA
11	tr|O00941|O00941_LINPO	Peridinin-chlorophyll a-binding protein PCP OS=Lingulodinium polyedrum PE=4 SV=1	1	83.7	68	70	382	VVASVPKKM[147]VM[147]DVYNSM[147]ASLVAPTVPNNMFASVNPLDANAA
11	tr|O00941|O00941_LINPO	Peridinin-chlorophyll a-binding protein PCP OS=Lingulodinium polyedrum PE=4 SV=1	1	83.7	68	70	382	EVDWNNGIFLQAPGK
11	tr|O00941|O00941_LINPO	Peridinin-chlorophyll a-binding protein PCP OS=Lingulodinium polyedrum PE=4 SV=1	1	83.7	68	70	382	ADGNLLKAAAQAH
11	tr|O00941|O00941_LINPO	Peridinin-chlorophyll a-binding protein PCP OS=Lingulodinium polyedrum PE=4 SV=1	1	83.7	68	70	382	RSQVSTAAAPPTVSASGDAIG
11	tr|O00941|O00941_LINPO	Peridinin-chlorophyll a-binding protein PCP OS=Lingulodinium polyedrum PE=4 SV=1	1	83.7	68	70	382	AFYTFKDVVQAASQV
11	tr|O00941|O00941_LINPO	Peridinin-chlorophyll a-binding protein PCP OS=Lingulodinium polyedrum PE=4 SV=1	1	83.7	68	70	382	AAAQAHHQAIGSIDANGVTS
11	tr|O00941|O00941_LINPO	Peridinin-chlorophyll a-binding protein PCP OS=Lingulodinium polyedrum PE=4 SV=1	1	83.7	68	70	382	MIMMGAK
11	tr|O00941|O00941_LINPO	Peridinin-chlorophyll a-binding protein PCP OS=Lingulodinium polyedrum PE=4 SV=1	1	83.7	68	70	382	ATVMDVYNSVSGITDPAVPAYM[147]K
11	tr|O00941|O00941_LINPO	Peridinin-chlorophyll a-binding protein PCP OS=Lingulodinium polyedrum PE=4 SV=1	1	83.7	68	70	382	PNNMFASVNPLDANAAAK
11	tr|O00941|O00941_LINPO	Peridinin-chlorophyll a-binding protein PCP OS=Lingulodinium polyedrum PE=4 SV=1	1	83.7	68	70	382	VPNNMFASVNPLDANAAAKAFYTFK
11	tr|O00941|O00941_LINPO	Peridinin-chlorophyll a-binding protein PCP OS=Lingulodinium polyedrum PE=4 SV=1	1	83.7	68	70	382	FQPLEALK
11	tr|O00941|O00941_LINPO	Peridinin-chlorophyll a-binding protein PCP OS=Lingulodinium polyedrum PE=4 SV=1	1	83.7	68	70	382	SQVSTAAAPPTVSASGDA
11	tr|O00941|O00941_LINPO	Peridinin-chlorophyll a-binding protein PCP OS=Lingulodinium polyedrum PE=4 SV=1	1	83.7	68	70	382	MMGAKADGNLLK
11	tr|O00941|O00941_LINPO	Peridinin-chlorophyll a-binding protein PCP OS=Lingulodinium polyedrum PE=4 SV=1	1	83.7	68	70	382	AAAASAATM[147]LAPAAFADEIGDAAKK
11	tr|O00941|O00941_LINPO	Peridinin-chlorophyll a-binding protein PCP OS=Lingulodinium polyedrum PE=4 SV=1	1	83.7	68	70	382	VVASVPKKMVM[147]DVYNSM[147]ASLVAPT
11	tr|O00941|O00941_LINPO	Peridinin-chlorophyll a-binding protein PCP OS=Lingulodinium polyedrum PE=4 SV=1	1	83.7	68	70	382	AFADEIGDAAKK
11	tr|O00941|O00941_LINPO	Peridinin-chlorophyll a-binding protein PCP OS=Lingulodinium polyedrum PE=4 SV=1	1	83.7	68	70	382	VVASVPKKMVMDVYNSM[147]ASLVAPTV
11	tr|O00941|O00941_LINPO	Peridinin-chlorophyll a-binding protein PCP OS=Lingulodinium polyedrum PE=4 SV=1	1	83.7	68	70	382	KLSEQSYPFLKDINW
12	tr|O96366|O96366_LINPO	Glyceraldehyde-3-phosphate dehydrogenase OS=Lingulodinium polyedrum GN=GAPDH PE=2 SV=1	1	80.2	53	57	437	AASGNIIPSSTGAAK
12	tr|O96366|O96366_LINPO	Glyceraldehyde-3-phosphate dehydrogenase OS=Lingulodinium polyedrum GN=GAPDH PE=2 SV=1	1	80.2	53	57	437	AGIMLDPTFVK
12	tr|O96366|O96366_LINPO	Glyceraldehyde-3-phosphate dehydrogenase OS=Lingulodinium polyedrum GN=GAPDH PE=2 SV=1	1	80.2	53	57	437	AGIM[147]LDPTFVK
12	tr|O96366|O96366_LINPO	Glyceraldehyde-3-phosphate dehydrogenase OS=Lingulodinium polyedrum GN=GAPDH PE=2 SV=1	1	80.2	53	57	437	IAMKDPEVELK
12	tr|O96366|O96366_LINPO	Glyceraldehyde-3-phosphate dehydrogenase OS=Lingulodinium polyedrum GN=GAPDH PE=2 SV=1	1	80.2	53	57	437	IAM[147]KDPEVELK
12	tr|O96366|O96366_LINPO	Glyceraldehyde-3-phosphate dehydrogenase OS=Lingulodinium polyedrum GN=GAPDH PE=2 SV=1	1	80.2	53	57	437	LINASYDADYLAYM[147]M[147]K
12	tr|O96366|O96366_LINPO	Glyceraldehyde-3-phosphate dehydrogenase OS=Lingulodinium polyedrum GN=GAPDH PE=2 SV=1	1	80.2	53	57	437	EVDGDALVIDGLK
12	tr|O96366|O96366_LINPO	Glyceraldehyde-3-phosphate dehydrogenase OS=Lingulodinium polyedrum GN=GAPDH PE=2 SV=1	1	80.2	53	57	437	GLMTTIHAMTASQPTVDSASK
12	tr|O96366|O96366_LINPO	Glyceraldehyde-3-phosphate dehydrogenase OS=Lingulodinium polyedrum GN=GAPDH PE=2 SV=1	1	80.2	53	57	437	GLMTTIHAM[147]TASQPTVDSASK
12	tr|O96366|O96366_LINPO	Glyceraldehyde-3-phosphate dehydrogenase OS=Lingulodinium polyedrum GN=GAPDH PE=2 SV=1	1	80.2	53	57	437	GLM[147]TTIHAM[147]TASQPTVDSASK
12	tr|O96366|O96366_LINPO	Glyceraldehyde-3-phosphate dehydrogenase OS=Lingulodinium polyedrum GN=GAPDH PE=2 SV=1	1	80.2	53	57	437	AVNDALGIKRGLMTTIHAMTASQPTVDSA
12	tr|O96366|O96366_LINPO	Glyceraldehyde-3-phosphate dehydrogenase OS=Lingulodinium polyedrum GN=GAPDH PE=2 SV=1	1	80.2	53	57	437	ALSMGRQSSSVAMR
12	tr|O96366|O96366_LINPO	Glyceraldehyde-3-phosphate dehydrogenase OS=Lingulodinium polyedrum GN=GAPDH PE=2 SV=1	1	80.2	53	57	437	FVKLVM[147]WYDNEWGYSCRVVDLIK
12	tr|O96366|O96366_LINPO	Glyceraldehyde-3-phosphate dehydrogenase OS=Lingulodinium polyedrum GN=GAPDH PE=2 SV=1	1	80.2	53	57	437	GVTSESAQVATAAPLER
12	tr|O96366|O96366_LINPO	Glyceraldehyde-3-phosphate dehydrogenase OS=Lingulodinium polyedrum GN=GAPDH PE=2 SV=1	1	80.2	53	57	437	RGLM[147]TTIHAM[147]TASQPTVDSAS
12	tr|O96366|O96366_LINPO	Glyceraldehyde-3-phosphate dehydrogenase OS=Lingulodinium polyedrum GN=GAPDH PE=2 SV=1	1	80.2	53	57	437	IAM[147]KDPEVELK
12	tr|O96366|O96366_LINPO	Glyceraldehyde-3-phosphate dehydrogenase OS=Lingulodinium polyedrum GN=GAPDH PE=2 SV=1	1	80.2	53	57	437	IAMKDPEVELK
12	tr|O96366|O96366_LINPO	Glyceraldehyde-3-phosphate dehydrogenase OS=Lingulodinium polyedrum GN=GAPDH PE=2 SV=1	1	80.2	53	57	437	YLAYM[147]MKYDTIHGK
12	tr|O96366|O96366_LINPO	Glyceraldehyde-3-phosphate dehydrogenase OS=Lingulodinium polyedrum GN=GAPDH PE=2 SV=1	1	80.2	53	57	437	SHGSQSSAWLATGAACALILSGAAARALSM[147]GRQSSSVAM[147]R
12	tr|O96366|O96366_LINPO	Glyceraldehyde-3-phosphate dehydrogenase OS=Lingulodinium polyedrum GN=GAPDH PE=2 SV=1	1	80.2	53	57	437	GVTSESAQVAT
12	tr|O96366|O96366_LINPO	Glyceraldehyde-3-phosphate dehydrogenase OS=Lingulodinium polyedrum GN=GAPDH PE=2 SV=1	1	80.2	53	57	437	LTGM[147]AFRVPTIDVSVV
12	tr|O96366|O96366_LINPO	Glyceraldehyde-3-phosphate dehydrogenase OS=Lingulodinium polyedrum GN=GAPDH PE=2 SV=1	1	80.2	53	57	437	IVFSAPAKDDSHTIVMGVNQDT
12	tr|O96366|O96366_LINPO	Glyceraldehyde-3-phosphate dehydrogenase OS=Lingulodinium polyedrum GN=GAPDH PE=2 SV=1	1	80.2	53	57	437	MTTIHAM[147]TASQPTVDSASKK
12	tr|O96366|O96366_LINPO	Glyceraldehyde-3-phosphate dehydrogenase OS=Lingulodinium polyedrum GN=GAPDH PE=2 SV=1	1	80.2	53	57	437	IVFSAPAKDDSHTIVMGVN
13	tr|O96367|O96367_LINPO	Glyceraldehyde-3-phosphate dehydrogenase OS=Lingulodinium polyedrum GN=GAPDH PE=2 SV=1	1	70.2	33	34	348	DAVPIYVVGVNHEDYK
13	tr|O96367|O96367_LINPO	Glyceraldehyde-3-phosphate dehydrogenase OS=Lingulodinium polyedrum GN=GAPDH PE=2 SV=1	1	70.2	33	34	348	LVSWYDNEWGYSNR
13	tr|O96367|O96367_LINPO	Glyceraldehyde-3-phosphate dehydrogenase OS=Lingulodinium polyedrum GN=GAPDH PE=2 SV=1	1	70.2	33	34	348	VPTPDVSVVDLTCR
13	tr|O96367|O96367_LINPO	Glyceraldehyde-3-phosphate dehydrogenase OS=Lingulodinium polyedrum GN=GAPDH PE=2 SV=1	1	70.2	33	34	348	YM[147]VYQLK
13	tr|O96367|O96367_LINPO	Glyceraldehyde-3-phosphate dehydrogenase OS=Lingulodinium polyedrum GN=GAPDH PE=2 SV=1	1	70.2	33	34	348	DAVPIYVVGVNHEDYK
13	tr|O96367|O96367_LINPO	Glyceraldehyde-3-phosphate dehydrogenase OS=Lingulodinium polyedrum GN=GAPDH PE=2 SV=1	1	70.2	33	34	348	MPPTM[147]GINGFGRIGR
13	tr|O96367|O96367_LINPO	Glyceraldehyde-3-phosphate dehydrogenase OS=Lingulodinium polyedrum GN=GAPDH PE=2 SV=1	1	70.2	33	34	348	MVYQLKYDSVHK
13	tr|O96367|O96367_LINPO	Glyceraldehyde-3-phosphate dehydrogenase OS=Lingulodinium polyedrum GN=GAPDH PE=2 SV=1	1	70.2	33	34	348	TTVHAM[147]TATQLTVDGPSVAAR
13	tr|O96367|O96367_LINPO	Glyceraldehyde-3-phosphate dehydrogenase OS=Lingulodinium polyedrum GN=GAPDH PE=2 SV=1	1	70.2	33	34	348	AALANPDIEVK
13	tr|O96367|O96367_LINPO	Glyceraldehyde-3-phosphate dehydrogenase OS=Lingulodinium polyedrum GN=GAPDH PE=2 SV=1	1	70.2	33	34	348	VIISAPPK
13	tr|O96367|O96367_LINPO	Glyceraldehyde-3-phosphate dehydrogenase OS=Lingulodinium polyedrum GN=GAPDH PE=2 SV=1	1	70.2	33	34	348	KVIISAPPKDAVPI
13	tr|O96367|O96367_LINPO	Glyceraldehyde-3-phosphate dehydrogenase OS=Lingulodinium polyedrum GN=GAPDH PE=2 SV=1	1	70.2	33	34	348	AGISLNDNFVK
13	tr|O96367|O96367_LINPO	Glyceraldehyde-3-phosphate dehydrogenase OS=Lingulodinium polyedrum GN=GAPDH PE=2 SV=1	1	70.2	33	34	348	VVHEKFGLLEGLMTTVHAMTATQ
13	tr|O96367|O96367_LINPO	Glyceraldehyde-3-phosphate dehydrogenase OS=Lingulodinium polyedrum GN=GAPDH PE=2 SV=1	1	70.2	33	34	348	EVDGKEFLVVDGKDVQV
13	tr|O96367|O96367_LINPO	Glyceraldehyde-3-phosphate dehydrogenase OS=Lingulodinium polyedrum GN=GAPDH PE=2 SV=1	1	70.2	33	34	348	YICESTGVFTAQEK
13	tr|O96367|O96367_LINPO	Glyceraldehyde-3-phosphate dehydrogenase OS=Lingulodinium polyedrum GN=GAPDH PE=2 SV=1	1	70.2	33	34	348	AAGPMSGVLDWTDEEVVSTDFVSCK
13	tr|O96367|O96367_LINPO	Glyceraldehyde-3-phosphate dehydrogenase OS=Lingulodinium polyedrum GN=GAPDH PE=2 SV=1	1	70.2	33	34	348	EFLVVDGK
13	tr|O96367|O96367_LINPO	Glyceraldehyde-3-phosphate dehydrogenase OS=Lingulodinium polyedrum GN=GAPDH PE=2 SV=1	1	70.2	33	34	348	LVFRAALANPDI
13	tr|O96367|O96367_LINPO	Glyceraldehyde-3-phosphate dehydrogenase OS=Lingulodinium polyedrum GN=GAPDH PE=2 SV=1	1	70.2	33	34	348	FGLLEGLMTTVHAMTA
13	tr|O96367|O96367_LINPO	Glyceraldehyde-3-phosphate dehydrogenase OS=Lingulodinium polyedrum GN=GAPDH PE=2 SV=1	1	70.2	33	34	348	IYVVGVNHEDYKTDR
14	tr|Q24LT3|Q24LT3_LINPO	Phosphoribulokinase OS=Lingulodinium polyedrum GN=PRK PE=2 SV=1	1	73.5	44	47	418	DLTLTGSKPGATLK
14	tr|Q24LT3|Q24LT3_LINPO	Phosphoribulokinase OS=Lingulodinium polyedrum GN=PRK PE=2 SV=1	1	73.5	44	47	418	EIEDNLEGLPSK
14	tr|Q24LT3|Q24LT3_LINPO	Phosphoribulokinase OS=Lingulodinium polyedrum GN=PRK PE=2 SV=1	1	73.5	44	47	418	GGAFPPISLK
14	tr|Q24LT3|Q24LT3_LINPO	Phosphoribulokinase OS=Lingulodinium polyedrum GN=PRK PE=2 SV=1	1	73.5	44	47	418	RLPDFSAYVDPQK
14	tr|Q24LT3|Q24LT3_LINPO	Phosphoribulokinase OS=Lingulodinium polyedrum GN=PRK PE=2 SV=1	1	73.5	44	47	418	SSPGSQNGTGMLQTVIAMK
14	tr|Q24LT3|Q24LT3_LINPO	Phosphoribulokinase OS=Lingulodinium polyedrum GN=PRK PE=2 SV=1	1	73.5	44	47	418	SSPGSQNGTGM[147]LQTVIAM[147]K
14	tr|Q24LT3|Q24LT3_LINPO	Phosphoribulokinase OS=Lingulodinium polyedrum GN=PRK PE=2 SV=1	1	73.5	44	47	418	YEPSDQGLPYLK
14	tr|Q24LT3|Q24LT3_LINPO	Phosphoribulokinase OS=Lingulodinium polyedrum GN=PRK PE=2 SV=1	1	73.5	44	47	418	AVYKPIYNHDTGNKDPPELIEPNK
14	tr|Q24LT3|Q24LT3_LINPO	Phosphoribulokinase OS=Lingulodinium polyedrum GN=PRK PE=2 SV=1	1	73.5	44	47	418	GAANSVPTGLVWPSPEAEA
14	tr|Q24LT3|Q24LT3_LINPO	Phosphoribulokinase OS=Lingulodinium polyedrum GN=PRK PE=2 SV=1	1	73.5	44	47	418	GAANSVPTGLVWPSPEAEAKLR
14	tr|Q24LT3|Q24LT3_LINPO	Phosphoribulokinase OS=Lingulodinium polyedrum GN=PRK PE=2 SV=1	1	73.5	44	47	418	RLPDFSAYVDPQK
14	tr|Q24LT3|Q24LT3_LINPO	Phosphoribulokinase OS=Lingulodinium polyedrum GN=PRK PE=2 SV=1	1	73.5	44	47	418	VICLDDYHTNDRAGR
14	tr|Q24LT3|Q24LT3_LINPO	Phosphoribulokinase OS=Lingulodinium polyedrum GN=PRK PE=2 SV=1	1	73.5	44	47	418	VM[147]VFEGLHPIYDK
14	tr|Q24LT3|Q24LT3_LINPO	Phosphoribulokinase OS=Lingulodinium polyedrum GN=PRK PE=2 SV=1	1	73.5	44	47	418	SSPGSQNGTGM[147]LQTVIAMK
14	tr|Q24LT3|Q24LT3_LINPO	Phosphoribulokinase OS=Lingulodinium polyedrum GN=PRK PE=2 SV=1	1	73.5	44	47	418	DPPELIEPNKV
14	tr|Q24LT3|Q24LT3_LINPO	Phosphoribulokinase OS=Lingulodinium polyedrum GN=PRK PE=2 SV=1	1	73.5	44	47	418	AERGWTEEQVREDIEK
14	tr|Q24LT3|Q24LT3_LINPO	Phosphoribulokinase OS=Lingulodinium polyedrum GN=PRK PE=2 SV=1	1	73.5	44	47	418	GVSPVVIGVAADSGCGK
14	tr|Q24LT3|Q24LT3_LINPO	Phosphoribulokinase OS=Lingulodinium polyedrum GN=PRK PE=2 SV=1	1	73.5	44	47	418	IKMYPTHAWTDDMM[147]PIVPATK
14	tr|Q24LT3|Q24LT3_LINPO	Phosphoribulokinase OS=Lingulodinium polyedrum GN=PRK PE=2 SV=1	1	73.5	44	47	418	SPGSQNGTGM[147]LQTVIAM[147]KFREVYEK
14	tr|Q24LT3|Q24LT3_LINPO	Phosphoribulokinase OS=Lingulodinium polyedrum GN=PRK PE=2 SV=1	1	73.5	44	47	418	LDDYHTNDR
14	tr|Q24LT3|Q24LT3_LINPO	Phosphoribulokinase OS=Lingulodinium polyedrum GN=PRK PE=2 SV=1	1	73.5	44	47	418	TLTGSKPGATLKMYDDDWFGNAVTVVEM[147]DGEIDM[147]DNM[147]EAQLK
14	tr|Q24LT3|Q24LT3_LINPO	Phosphoribulokinase OS=Lingulodinium polyedrum GN=PRK PE=2 SV=1	1	73.5	44	47	418	DIEKRLPDFSAYVDPQK
14	tr|Q24LT3|Q24LT3_LINPO	Phosphoribulokinase OS=Lingulodinium polyedrum GN=PRK PE=2 SV=1	1	73.5	44	47	418	ALTAMRGAANS
14	tr|Q24LT3|Q24LT3_LINPO	Phosphoribulokinase OS=Lingulodinium polyedrum GN=PRK PE=2 SV=1	1	73.5	44	47	418	DQLDLGIYIDIVN
14	tr|Q24LT3|Q24LT3_LINPO	Phosphoribulokinase OS=Lingulodinium polyedrum GN=PRK PE=2 SV=1	1	73.5	44	47	418	GWTEEQVREDIEK
14	tr|Q24LT3|Q24LT3_LINPO	Phosphoribulokinase OS=Lingulodinium polyedrum GN=PRK PE=2 SV=1	1	73.5	44	47	418	AERGWTEEQVR
14	tr|Q24LT3|Q24LT3_LINPO	Phosphoribulokinase OS=Lingulodinium polyedrum GN=PRK PE=2 SV=1	1	73.5	44	47	418	SSPGSQNGTGMLQTVIAM[147]K
14	tr|Q24LT3|Q24LT3_LINPO	Phosphoribulokinase OS=Lingulodinium polyedrum GN=PRK PE=2 SV=1	1	73.5	44	47	418	NDFALM[147]GVQIEALK
15	tr|Q2I6N8|Q2I6N8_LINPO	ATP synthase beta chain (Fragment) OS=Lingulodinium polyedrum GN=atpB PE=2 SV=1	1	83.8	26	29	258	GIYPAVDPFNSTSK
15	tr|Q2I6N8|Q2I6N8_LINPO	ATP synthase beta chain (Fragment) OS=Lingulodinium polyedrum GN=atpB PE=2 SV=1	1	83.8	26	29	258	EGNDLYCEM[147]QDSSIISFGEVACEM[147]QDSGIISLGEV
15	tr|Q2I6N8|Q2I6N8_LINPO	ATP synthase beta chain (Fragment) OS=Lingulodinium polyedrum GN=atpB PE=2 SV=1	1	83.8	26	29	258	QIM[147]QRYKEL
15	tr|Q2I6N8|Q2I6N8_LINPO	ATP synthase beta chain (Fragment) OS=Lingulodinium polyedrum GN=atpB PE=2 SV=1	1	83.8	26	29	258	QIMQRYKELQ
15	tr|Q2I6N8|Q2I6N8_LINPO	ATP synthase beta chain (Fragment) OS=Lingulodinium polyedrum GN=atpB PE=2 SV=1	1	83.8	26	29	258	SLGNTIFGFSK
15	tr|Q2I6N8|Q2I6N8_LINPO	ATP synthase beta chain (Fragment) OS=Lingulodinium polyedrum GN=atpB PE=2 SV=1	1	83.8	26	29	258	GLEELSDQDRIIVDR
15	tr|Q2I6N8|Q2I6N8_LINPO	ATP synthase beta chain (Fragment) OS=Lingulodinium polyedrum GN=atpB PE=2 SV=1	1	83.8	26	29	258	LDPYYVEQEHFCVAQDVK
15	tr|Q2I6N8|Q2I6N8_LINPO	ATP synthase beta chain (Fragment) OS=Lingulodinium polyedrum GN=atpB PE=2 SV=1	1	83.8	26	29	258	GDLDTFMEGSFYLKGAIDDIYK
15	tr|Q2I6N8|Q2I6N8_LINPO	ATP synthase beta chain (Fragment) OS=Lingulodinium polyedrum GN=atpB PE=2 SV=1	1	83.8	26	29	258	FMEGSFYLK
15	tr|Q2I6N8|Q2I6N8_LINPO	ATP synthase beta chain (Fragment) OS=Lingulodinium polyedrum GN=atpB PE=2 SV=1	1	83.8	26	29	258	RQPCSVYKHSFSSEQSQVPAPVVIFGHLDAVTVLSR
15	tr|Q2I6N8|Q2I6N8_LINPO	ATP synthase beta chain (Fragment) OS=Lingulodinium polyedrum GN=atpB PE=2 SV=1	1	83.8	26	29	258	RQPCSVYKHSFSSEQSQVPA
15	tr|Q2I6N8|Q2I6N8_LINPO	ATP synthase beta chain (Fragment) OS=Lingulodinium polyedrum GN=atpB PE=2 SV=1	1	83.8	26	29	258	VLAAKGIYPAVDPFNST
16	tr|Q2I6N9|Q2I6N9_LINPO	ATP synthase beta chain (Fragment) OS=Lingulodinium polyedrum GN=atpB PE=2 SV=1	1	67.3	8	8	103	SLGNTIFGFSK
16	tr|Q2I6N9|Q2I6N9_LINPO	ATP synthase beta chain (Fragment) OS=Lingulodinium polyedrum GN=atpB PE=2 SV=1	1	67.3	8	8	103	TIFGFSKIIKGDLDIFM[147]EGSFYLK
16	tr|Q2I6N9|Q2I6N9_LINPO	ATP synthase beta chain (Fragment) OS=Lingulodinium polyedrum GN=atpB PE=2 SV=1	1	67.3	8	8	103	FMEGSFYLK
17	tr|Q2I6P0|Q2I6P0_LINPO	ATP synthase subunit alpha, chloroplastic OS=Lingulodinium polyedrum GN=atpA PE=2 SV=1	1	53.6	19	19	471	VLCVYVPIGQK
17	tr|Q2I6P0|Q2I6P0_LINPO	ATP synthase subunit alpha, chloroplastic OS=Lingulodinium polyedrum GN=atpA PE=2 SV=1	1	53.6	19	19	471	EAFPGEIFFVHSR
17	tr|Q2I6P0|Q2I6P0_LINPO	ATP synthase subunit alpha, chloroplastic OS=Lingulodinium polyedrum GN=atpA PE=2 SV=1	1	53.6	19	19	471	IGVDTILNQK
17	tr|Q2I6P0|Q2I6P0_LINPO	ATP synthase subunit alpha, chloroplastic OS=Lingulodinium polyedrum GN=atpA PE=2 SV=1	1	53.6	19	19	471	IDAQHRWVIESPAP
17	tr|Q2I6P0|Q2I6P0_LINPO	ATP synthase subunit alpha, chloroplastic OS=Lingulodinium polyedrum GN=atpA PE=2 SV=1	1	53.6	19	19	471	VGELPSFIM[147]LDDLSRHAVAYR
17	tr|Q2I6P0|Q2I6P0_LINPO	ATP synthase subunit alpha, chloroplastic OS=Lingulodinium polyedrum GN=atpA PE=2 SV=1	1	53.6	19	19	471	M[147]SVPIWVYLFVPVR
17	tr|Q2I6P0|Q2I6P0_LINPO	ATP synthase subunit alpha, chloroplastic OS=Lingulodinium polyedrum GN=atpA PE=2 SV=1	1	53.6	19	19	471	VGSVAQWDGM[147]KYVSGSY
18	tr|Q2I6P3|Q2I6P3_LINPO	Photosystem I P700 chlorophyll a apoprotein A1 (Fragment) OS=Lingulodinium polyedrum GN=psaA PE=2 SV=1	1	52.3	30	31	751	FLGSDVEVLETKVVRTALQLGTADFLVHHIHAFTIHTTVL
18	tr|Q2I6P3|Q2I6P3_LINPO	Photosystem I P700 chlorophyll a apoprotein A1 (Fragment) OS=Lingulodinium polyedrum GN=psaA PE=2 SV=1	1	52.3	30	31	751	LGSDVEVLETK
18	tr|Q2I6P3|Q2I6P3_LINPO	Photosystem I P700 chlorophyll a apoprotein A1 (Fragment) OS=Lingulodinium polyedrum GN=psaA PE=2 SV=1	1	52.3	30	31	751	ELIESIVWAHHK
18	tr|Q2I6P3|Q2I6P3_LINPO	Photosystem I P700 chlorophyll a apoprotein A1 (Fragment) OS=Lingulodinium polyedrum GN=psaA PE=2 SV=1	1	52.3	30	31	751	NFLWSGSAQVLQSYGTPLAGYG
18	tr|Q2I6P3|Q2I6P3_LINPO	Photosystem I P700 chlorophyll a apoprotein A1 (Fragment) OS=Lingulodinium polyedrum GN=psaA PE=2 SV=1	1	52.3	30	31	751	ASICLIRDYNYNYNNVNTLGR
18	tr|Q2I6P3|Q2I6P3_LINPO	Photosystem I P700 chlorophyll a apoprotein A1 (Fragment) OS=Lingulodinium polyedrum GN=psaA PE=2 SV=1	1	52.3	30	31	751	IAHIQPDFSVNSVTINGWLRNFLW
18	tr|Q2I6P3|Q2I6P3_LINPO	Photosystem I P700 chlorophyll a apoprotein A1 (Fragment) OS=Lingulodinium polyedrum GN=psaA PE=2 SV=1	1	52.3	30	31	751	ISFQNSTAGVEEVGVGVGK
18	tr|Q2I6P3|Q2I6P3_LINPO	Photosystem I P700 chlorophyll a apoprotein A1 (Fragment) OS=Lingulodinium polyedrum GN=psaA PE=2 SV=1	1	52.3	30	31	751	LAILYGLGSISWCGHM[147]THIS
18	tr|Q2I6P3|Q2I6P3_LINPO	Photosystem I P700 chlorophyll a apoprotein A1 (Fragment) OS=Lingulodinium polyedrum GN=psaA PE=2 SV=1	1	52.3	30	31	751	SVTINGWLR
18	tr|Q2I6P3|Q2I6P3_LINPO	Photosystem I P700 chlorophyll a apoprotein A1 (Fragment) OS=Lingulodinium polyedrum GN=psaA PE=2 SV=1	1	52.3	30	31	751	SICLIRDYNYNYNNVNTLGR
18	tr|Q2I6P3|Q2I6P3_LINPO	Photosystem I P700 chlorophyll a apoprotein A1 (Fragment) OS=Lingulodinium polyedrum GN=psaA PE=2 SV=1	1	52.3	30	31	751	SM[147]QTHKLAILYGLGSISWCG
18	tr|Q2I6P3|Q2I6P3_LINPO	Photosystem I P700 chlorophyll a apoprotein A1 (Fragment) OS=Lingulodinium polyedrum GN=psaA PE=2 SV=1	1	52.3	30	31	751	KSMSVSISSWHGQLAINLAFTGSLS
19	tr|Q2I6P4|Q2I6P4_LINPO	Cytochrome b6 OS=Lingulodinium polyedrum GN=petB PE=2 SV=1	1	53	12	12	223	ISVIILR
19	tr|Q2I6P4|Q2I6P4_LINPO	Cytochrome b6 OS=Lingulodinium polyedrum GN=petB PE=2 SV=1	1	53	12	12	223	VYLTGGFK
19	tr|Q2I6P4|Q2I6P4_LINPO	Cytochrome b6 OS=Lingulodinium polyedrum GN=petB PE=2 SV=1	1	53	12	12	223	WSSGVM[147]VLVLALHIN
19	tr|Q2I6P4|Q2I6P4_LINPO	Cytochrome b6 OS=Lingulodinium polyedrum GN=petB PE=2 SV=1	1	53	12	12	223	IVTAVPEALDDLIPGVGK
19	tr|Q2I6P4|Q2I6P4_LINPO	Cytochrome b6 OS=Lingulodinium polyedrum GN=petB PE=2 SV=1	1	53	12	12	223	IVTAVPEALDDLIPGVGK
19	tr|Q2I6P4|Q2I6P4_LINPO	Cytochrome b6 OS=Lingulodinium polyedrum GN=petB PE=2 SV=1	1	53	12	12	223	YLTGGFKKPR
20	tr|Q2I6P5|Q2I6P5_LINPO	Cytochrome b6/f complex subunit IV OS=Lingulodinium polyedrum GN=petD PE=2 SV=1	1	48.1	5	5	163	EWYFFPTFNLLR
20	tr|Q2I6P5|Q2I6P5_LINPO	Cytochrome b6/f complex subunit IV OS=Lingulodinium polyedrum GN=petD PE=2 SV=1	1	48.1	5	5	163	VLPDKFIGVLGQLYFPGVLLILPLGENLSRFQNPLR
20	tr|Q2I6P5|Q2I6P5_LINPO	Cytochrome b6/f complex subunit IV OS=Lingulodinium polyedrum GN=petD PE=2 SV=1	1	48.1	5	5	163	RPVVIM[147]MNLTAVMYSI
21	tr|Q2I6P6|Q2I6P6_LINPO	Photosystem II D2 protein OS=Lingulodinium polyedrum GN=psbD PE=2 SV=1	1	31	17	17	385	AFSPTQPEETYSMVTANR
21	tr|Q2I6P6|Q2I6P6_LINPO	Photosystem II D2 protein OS=Lingulodinium polyedrum GN=psbD PE=2 SV=1	1	31	17	17	385	AFSPTQPEETYSM[147]VTANR
21	tr|Q2I6P6|Q2I6P6_LINPO	Photosystem II D2 protein OS=Lingulodinium polyedrum GN=psbD PE=2 SV=1	1	31	17	17	385	AFSPTQPEETYSM[147]VTANR
21	tr|Q2I6P6|Q2I6P6_LINPO	Photosystem II D2 protein OS=Lingulodinium polyedrum GN=psbD PE=2 SV=1	1	31	17	17	385	NILLNEGIRLWMAVQDQPHENFQFPEEVL
21	tr|Q2I6P6|Q2I6P6_LINPO	Photosystem II D2 protein OS=Lingulodinium polyedrum GN=psbD PE=2 SV=1	1	31	17	17	385	M[147]YRNLIGFLLLI
21	tr|Q2I6P6|Q2I6P6_LINPO	Photosystem II D2 protein OS=Lingulodinium polyedrum GN=psbD PE=2 SV=1	1	31	17	17	385	NFQFPEEVLPR
21	tr|Q2I6P6|Q2I6P6_LINPO	Photosystem II D2 protein OS=Lingulodinium polyedrum GN=psbD PE=2 SV=1	1	31	17	17	385	FYTKNILLNEGIR
21	tr|Q2I6P6|Q2I6P6_LINPO	Photosystem II D2 protein OS=Lingulodinium polyedrum GN=psbD PE=2 SV=1	1	31	17	17	385	WLHFFM[147]LFVPLTGM[147]WTSSVGI
21	tr|Q2I6P6|Q2I6P6_LINPO	Photosystem II D2 protein OS=Lingulodinium polyedrum GN=psbD PE=2 SV=1	1	31	17	17	385	NILLNEGIRLWMAVQDQPH
22	tr|Q2I6P8|Q2I6P8_LINPO	Photosystem II CP47 reaction center protein OS=Lingulodinium polyedrum GN=psbB PE=2 SV=1	1	50.3	23	24	518	LGEDVNNASALI
22	tr|Q2I6P8|Q2I6P8_LINPO	Photosystem II CP47 reaction center protein OS=Lingulodinium polyedrum GN=psbB PE=2 SV=1	1	50.3	23	24	518	LVFYDYIGCNPSK
22	tr|Q2I6P8|Q2I6P8_LINPO	Photosystem II CP47 reaction center protein OS=Lingulodinium polyedrum GN=psbB PE=2 SV=1	1	50.3	23	24	518	NFDLLLNK
22	tr|Q2I6P8|Q2I6P8_LINPO	Photosystem II CP47 reaction center protein OS=Lingulodinium polyedrum GN=psbB PE=2 SV=1	1	50.3	23	24	518	SGPMIKGDGIVQNWL
22	tr|Q2I6P8|Q2I6P8_LINPO	Photosystem II CP47 reaction center protein OS=Lingulodinium polyedrum GN=psbB PE=2 SV=1	1	50.3	23	24	518	AESRYSIEQTSVVLYFQGG
22	tr|Q2I6P8|Q2I6P8_LINPO	Photosystem II CP47 reaction center protein OS=Lingulodinium polyedrum GN=psbB PE=2 SV=1	1	50.3	23	24	518	GMGNIESVLSSSISSVFFSAFVTSGLM[147]WYGSVSTALELFGPSR
22	tr|Q2I6P8|Q2I6P8_LINPO	Photosystem II CP47 reaction center protein OS=Lingulodinium polyedrum GN=psbB PE=2 SV=1	1	50.3	23	24	518	PEKLVFYDYIGCNPSK
22	tr|Q2I6P8|Q2I6P8_LINPO	Photosystem II CP47 reaction center protein OS=Lingulodinium polyedrum GN=psbB PE=2 SV=1	1	50.3	23	24	518	GLMWYGSVSTALELFGPSR
22	tr|Q2I6P8|Q2I6P8_LINPO	Photosystem II CP47 reaction center protein OS=Lingulodinium polyedrum GN=psbB PE=2 SV=1	1	50.3	23	24	518	QGCYVMPFVSRLGVVRSFYDW
22	tr|Q2I6P8|Q2I6P8_LINPO	Photosystem II CP47 reaction center protein OS=Lingulodinium polyedrum GN=psbB PE=2 SV=1	1	50.3	23	24	518	SGLMWYGSVSTALELFGPSR
22	tr|Q2I6P8|Q2I6P8_LINPO	Photosystem II CP47 reaction center protein OS=Lingulodinium polyedrum GN=psbB PE=2 SV=1	1	50.3	23	24	518	LLGM[147]GNIESVLSSSI
23	tr|Q2I6P9|Q2I6P9_LINPO	Photosystem II protein D1 OS=Lingulodinium polyedrum GN=psbA PE=2 SV=1	1	33	19	25	351	ADLGMEVM[147]HER
23	tr|Q2I6P9|Q2I6P9_LINPO	Photosystem II protein D1 OS=Lingulodinium polyedrum GN=psbA PE=2 SV=1	1	33	19	25	351	ADLGM[147]EVMHER
23	tr|Q2I6P9|Q2I6P9_LINPO	Photosystem II protein D1 OS=Lingulodinium polyedrum GN=psbA PE=2 SV=1	1	33	19	25	351	ADLGM[147]EVM[147]HER
23	tr|Q2I6P9|Q2I6P9_LINPO	Photosystem II protein D1 OS=Lingulodinium polyedrum GN=psbA PE=2 SV=1	1	33	19	25	351	EPVAGSLLYGNNIITGA
23	tr|Q2I6P9|Q2I6P9_LINPO	Photosystem II protein D1 OS=Lingulodinium polyedrum GN=psbA PE=2 SV=1	1	33	19	25	351	EWEFSFR
23	tr|Q2I6P9|Q2I6P9_LINPO	Photosystem II protein D1 OS=Lingulodinium polyedrum GN=psbA PE=2 SV=1	1	33	19	25	351	LIFQYASFNNSR
23	tr|Q2I6P9|Q2I6P9_LINPO	Photosystem II protein D1 OS=Lingulodinium polyedrum GN=psbA PE=2 SV=1	1	33	19	25	351	LINSWADIVNR
23	tr|Q2I6P9|Q2I6P9_LINPO	Photosystem II protein D1 OS=Lingulodinium polyedrum GN=psbA PE=2 SV=1	1	33	19	25	351	NAHNFPLDLA
23	tr|Q2I6P9|Q2I6P9_LINPO	Photosystem II protein D1 OS=Lingulodinium polyedrum GN=psbA PE=2 SV=1	1	33	19	25	351	ADLGMEVM[147]HER
23	tr|Q2I6P9|Q2I6P9_LINPO	Photosystem II protein D1 OS=Lingulodinium polyedrum GN=psbA PE=2 SV=1	1	33	19	25	351	ADLGM[147]EVMHER
23	tr|Q2I6P9|Q2I6P9_LINPO	Photosystem II protein D1 OS=Lingulodinium polyedrum GN=psbA PE=2 SV=1	1	33	19	25	351	ADLGM[147]EVM[147]HER
23	tr|Q2I6P9|Q2I6P9_LINPO	Photosystem II protein D1 OS=Lingulodinium polyedrum GN=psbA PE=2 SV=1	1	33	19	25	351	LIFQYASFNNSR
23	tr|Q2I6P9|Q2I6P9_LINPO	Photosystem II protein D1 OS=Lingulodinium polyedrum GN=psbA PE=2 SV=1	1	33	19	25	351	NSWADIVNRADLGM[147]EVMHERNAHNFPLDLA
23	tr|Q2I6P9|Q2I6P9_LINPO	Photosystem II protein D1 OS=Lingulodinium polyedrum GN=psbA PE=2 SV=1	1	33	19	25	351	LINSWADIVNR
23	tr|Q2I6P9|Q2I6P9_LINPO	Photosystem II protein D1 OS=Lingulodinium polyedrum GN=psbA PE=2 SV=1	1	33	19	25	351	MKNTYSIFGGSYSWWGYLVGFVLSTSNRFYIGWFGI
24	tr|Q39907|Q39907_LINPO	MRNA, complete ORF OS=Lingulodinium polyedrum PE=2 SV=1	1	56.8	16	16	394	RQCM[147]VTRDNGFGSQVNQACTPWP
24	tr|Q39907|Q39907_LINPO	MRNA, complete ORF OS=Lingulodinium polyedrum PE=2 SV=1	1	56.8	16	16	394	TDCPGAILAAGCSLDSVQGTAPDGEGR
24	tr|Q39907|Q39907_LINPO	MRNA, complete ORF OS=Lingulodinium polyedrum PE=2 SV=1	1	56.8	16	16	394	GLGVGQCGVQSHSLEDAPSCASEAVELGAGILDDHHK
24	tr|Q39907|Q39907_LINPO	MRNA, complete ORF OS=Lingulodinium polyedrum PE=2 SV=1	1	56.8	16	16	394	MLPAGTTEASMTRNLLW
25	tr|Q39908|Q39908_LINPO	CAMP-dependent protein kinase OS=Lingulodinium polyedrum PE=2 SV=1	1	73.5	26	26	338	GHGKAVDWYSVGALTYEM[147]LT
25	tr|Q39908|Q39908_LINPO	CAMP-dependent protein kinase OS=Lingulodinium polyedrum PE=2 SV=1	1	73.5	26	26	338	YCPGGELFFHLSR
25	tr|Q39908|Q39908_LINPO	CAMP-dependent protein kinase OS=Lingulodinium polyedrum PE=2 SV=1	1	73.5	26	26	338	EGGRDLGHLEASTLTGK
25	tr|Q39908|Q39908_LINPO	CAMP-dependent protein kinase OS=Lingulodinium polyedrum PE=2 SV=1	1	73.5	26	26	338	GGELFFHLSRAGR
25	tr|Q39908|Q39908_LINPO	CAMP-dependent protein kinase OS=Lingulodinium polyedrum PE=2 SV=1	1	73.5	26	26	338	FFGGLDWVALEK
25	tr|Q39908|Q39908_LINPO	CAMP-dependent protein kinase OS=Lingulodinium polyedrum PE=2 SV=1	1	73.5	26	26	338	NLLIDGEGHAKITDFGLRK
25	tr|Q39908|Q39908_LINPO	CAMP-dependent protein kinase OS=Lingulodinium polyedrum PE=2 SV=1	1	73.5	26	26	338	ENVIKRNQVEHT
25	tr|Q39908|Q39908_LINPO	CAMP-dependent protein kinase OS=Lingulodinium polyedrum PE=2 SV=1	1	73.5	26	26	338	FYVAETSSAVAYLHQ
25	tr|Q39908|Q39908_LINPO	CAMP-dependent protein kinase OS=Lingulodinium polyedrum PE=2 SV=1	1	73.5	26	26	338	EVKGHEFFGGLDWVALEK
25	tr|Q39908|Q39908_LINPO	CAMP-dependent protein kinase OS=Lingulodinium polyedrum PE=2 SV=1	1	73.5	26	26	338	KEGIQDNHSAM[147]TMCGTPEYLAPEILD
25	tr|Q39908|Q39908_LINPO	CAMP-dependent protein kinase OS=Lingulodinium polyedrum PE=2 SV=1	1	73.5	26	26	338	LRALLQRNPDAR
25	tr|Q39908|Q39908_LINPO	CAMP-dependent protein kinase OS=Lingulodinium polyedrum PE=2 SV=1	1	73.5	26	26	338	EVKGHEFFGGLDWVALEKR
26	tr|Q39909|Q39909_LINPO	Luciferin-binding protein OS=Lingulodinium polyedrum PE=2 SV=1	1	75.3	3	3	681	AAQTGANAIQATGAAPAPSTK
26	tr|Q39909|Q39909_LINPO	Luciferin-binding protein OS=Lingulodinium polyedrum PE=2 SV=1	1	75.3	3	3	681	LLDMPGTPTVTDNVR
26	tr|Q39909|Q39909_LINPO	Luciferin-binding protein OS=Lingulodinium polyedrum PE=2 SV=1	1	75.3	3	3	681	LNWQAPYAIAR
26	tr|Q39909|Q39909_LINPO	Luciferin-binding protein OS=Lingulodinium polyedrum PE=2 SV=1	1	75.3	3	3	681	PTACQVTDCNGYVER
26	tr|Q39909|Q39909_LINPO	Luciferin-binding protein OS=Lingulodinium polyedrum PE=2 SV=1	1	75.3	3	3	681	VIDVDPTACQVTDCNGYVER
26	tr|Q39909|Q39909_LINPO	Luciferin-binding protein OS=Lingulodinium polyedrum PE=2 SV=1	1	75.3	3	3	681	AMVESIREPAR
26	tr|Q39909|Q39909_LINPO	Luciferin-binding protein OS=Lingulodinium polyedrum PE=2 SV=1	1	75.3	3	3	681	ECSYDSLLTAIQASIKQP
26	tr|Q39909|Q39909_LINPO	Luciferin-binding protein OS=Lingulodinium polyedrum PE=2 SV=1	1	75.3	3	3	681	RSM[147]RLLDM[147]PGTPTVTDNVR
26	tr|Q39909|Q39909_LINPO	Luciferin-binding protein OS=Lingulodinium polyedrum PE=2 SV=1	1	75.3	3	3	681	VDGFRVQWDM[147]PRSAPLN
26	tr|Q39909|Q39909_LINPO	Luciferin-binding protein OS=Lingulodinium polyedrum PE=2 SV=1	1	75.3	3	3	681	VIESAQEITYRPVK
26	tr|Q39909|Q39909_LINPO	Luciferin-binding protein OS=Lingulodinium polyedrum PE=2 SV=1	1	75.3	3	3	681	VQWDM[147]PRSAPL
26	tr|Q39909|Q39909_LINPO	Luciferin-binding protein OS=Lingulodinium polyedrum PE=2 SV=1	1	75.3	3	3	681	ELIGIAGK
26	tr|Q39909|Q39909_LINPO	Luciferin-binding protein OS=Lingulodinium polyedrum PE=2 SV=1	1	75.3	3	3	681	GQLVQFLANEGK
26	tr|Q39909|Q39909_LINPO	Luciferin-binding protein OS=Lingulodinium polyedrum PE=2 SV=1	1	75.3	3	3	681	LKATGECVLER
26	tr|Q39909|Q39909_LINPO	Luciferin-binding protein OS=Lingulodinium polyedrum PE=2 SV=1	1	75.3	3	3	681	VYRVVDSTTK
26	tr|Q39909|Q39909_LINPO	Luciferin-binding protein OS=Lingulodinium polyedrum PE=2 SV=1	1	75.3	3	3	681	LTSVSDFANYFTSSEF
26	tr|Q39909|Q39909_LINPO	Luciferin-binding protein OS=Lingulodinium polyedrum PE=2 SV=1	1	75.3	3	3	681	TIRDM[147]PGYMQR
26	tr|Q39909|Q39909_LINPO	Luciferin-binding protein OS=Lingulodinium polyedrum PE=2 SV=1	1	75.3	3	3	681	AAQTGANAIQATGAAP
26	tr|Q39909|Q39909_LINPO	Luciferin-binding protein OS=Lingulodinium polyedrum PE=2 SV=1	1	75.3	3	3	681	TLTANGVTYTDNIYDDEASCEIVY
26	tr|Q39909|Q39909_LINPO	Luciferin-binding protein OS=Lingulodinium polyedrum PE=2 SV=1	1	75.3	3	3	681	AAWKAAQTGANAIQATGAAP
26	tr|Q39909|Q39909_LINPO	Luciferin-binding protein OS=Lingulodinium polyedrum PE=2 SV=1	1	75.3	3	3	681	TDADGLFEALVYK
26	tr|Q39909|Q39909_LINPO	Luciferin-binding protein OS=Lingulodinium polyedrum PE=2 SV=1	1	75.3	3	3	681	LAKQLEKNTSDV
26	tr|Q39909|Q39909_LINPO	Luciferin-binding protein OS=Lingulodinium polyedrum PE=2 SV=1	1	75.3	3	3	681	TACQVTDCNGYVERKMTLK
26	tr|Q39909|Q39909_LINPO	Luciferin-binding protein OS=Lingulodinium polyedrum PE=2 SV=1	1	75.3	3	3	681	AVDAFVREAKR
26	tr|Q39909|Q39909_LINPO	Luciferin-binding protein OS=Lingulodinium polyedrum PE=2 SV=1	1	75.3	3	3	681	WRAMVESIR
26	tr|Q39909|Q39909_LINPO	Luciferin-binding protein OS=Lingulodinium polyedrum PE=2 SV=1	1	75.3	3	3	681	AAQTGANAIQATGAAPAPSTKVVGMGWTSQEITTTDADGL
26	tr|Q39909|Q39909_LINPO	Luciferin-binding protein OS=Lingulodinium polyedrum PE=2 SV=1	1	75.3	3	3	681	VIDRPGFLAR
26	tr|Q39909|Q39909_LINPO	Luciferin-binding protein OS=Lingulodinium polyedrum PE=2 SV=1	1	75.3	3	3	681	AAQTGANAIQATGAAPA
26	tr|Q39909|Q39909_LINPO	Luciferin-binding protein OS=Lingulodinium polyedrum PE=2 SV=1	1	75.3	3	3	681	RMDSTPPTTIGYGITSDPI
27	tr|Q39910|Q39910_LINPO	Luciferin binding protein OS=Lingulodinium polyedrum PE=2 SV=1	1	76.2	19	20	681	AAQTGANAIQATGAAPAPSTK
27	tr|Q39910|Q39910_LINPO	Luciferin binding protein OS=Lingulodinium polyedrum PE=2 SV=1	1	76.2	19	20	681	LLDMPGTPTVTDNVR
27	tr|Q39910|Q39910_LINPO	Luciferin binding protein OS=Lingulodinium polyedrum PE=2 SV=1	1	76.2	19	20	681	LNWQAPYAIAR
27	tr|Q39910|Q39910_LINPO	Luciferin binding protein OS=Lingulodinium polyedrum PE=2 SV=1	1	76.2	19	20	681	AMVESIREPAR
27	tr|Q39910|Q39910_LINPO	Luciferin binding protein OS=Lingulodinium polyedrum PE=2 SV=1	1	76.2	19	20	681	ECSYDSLLTAIQASIKQP
27	tr|Q39910|Q39910_LINPO	Luciferin binding protein OS=Lingulodinium polyedrum PE=2 SV=1	1	76.2	19	20	681	RSM[147]RLLDM[147]PGTPTVTDNVR
27	tr|Q39910|Q39910_LINPO	Luciferin binding protein OS=Lingulodinium polyedrum PE=2 SV=1	1	76.2	19	20	681	VDGFRVQWDM[147]PRSAPLN
27	tr|Q39910|Q39910_LINPO	Luciferin binding protein OS=Lingulodinium polyedrum PE=2 SV=1	1	76.2	19	20	681	VIESAQEITYRPVK
27	tr|Q39910|Q39910_LINPO	Luciferin binding protein OS=Lingulodinium polyedrum PE=2 SV=1	1	76.2	19	20	681	VQWDM[147]PRSAPL
27	tr|Q39910|Q39910_LINPO	Luciferin binding protein OS=Lingulodinium polyedrum PE=2 SV=1	1	76.2	19	20	681	ELIGIAGK
27	tr|Q39910|Q39910_LINPO	Luciferin binding protein OS=Lingulodinium polyedrum PE=2 SV=1	1	76.2	19	20	681	GQLVQFLANEGK
27	tr|Q39910|Q39910_LINPO	Luciferin binding protein OS=Lingulodinium polyedrum PE=2 SV=1	1	76.2	19	20	681	LKATGECVLER
27	tr|Q39910|Q39910_LINPO	Luciferin binding protein OS=Lingulodinium polyedrum PE=2 SV=1	1	76.2	19	20	681	VYRVVDSTTK
27	tr|Q39910|Q39910_LINPO	Luciferin binding protein OS=Lingulodinium polyedrum PE=2 SV=1	1	76.2	19	20	681	LTSVSDFANYFTSSEF
27	tr|Q39910|Q39910_LINPO	Luciferin binding protein OS=Lingulodinium polyedrum PE=2 SV=1	1	76.2	19	20	681	RMDSIPPTTVGYGITS
27	tr|Q39910|Q39910_LINPO	Luciferin binding protein OS=Lingulodinium polyedrum PE=2 SV=1	1	76.2	19	20	681	TACQVTDCNGYVERKMTLK
27	tr|Q39910|Q39910_LINPO	Luciferin binding protein OS=Lingulodinium polyedrum PE=2 SV=1	1	76.2	19	20	681	TIRDM[147]PGYMQR
27	tr|Q39910|Q39910_LINPO	Luciferin binding protein OS=Lingulodinium polyedrum PE=2 SV=1	1	76.2	19	20	681	AAQTGANAIQATGAAP
27	tr|Q39910|Q39910_LINPO	Luciferin binding protein OS=Lingulodinium polyedrum PE=2 SV=1	1	76.2	19	20	681	TLTANGVTYTDNIYDDEASCEIVY
27	tr|Q39910|Q39910_LINPO	Luciferin binding protein OS=Lingulodinium polyedrum PE=2 SV=1	1	76.2	19	20	681	AAWKAAQTGANAIQATGAAP
27	tr|Q39910|Q39910_LINPO	Luciferin binding protein OS=Lingulodinium polyedrum PE=2 SV=1	1	76.2	19	20	681	TDADGLFEALVYK
27	tr|Q39910|Q39910_LINPO	Luciferin binding protein OS=Lingulodinium polyedrum PE=2 SV=1	1	76.2	19	20	681	LAKQLEKNTSDV
27	tr|Q39910|Q39910_LINPO	Luciferin binding protein OS=Lingulodinium polyedrum PE=2 SV=1	1	76.2	19	20	681	AVDAFVREAKR
27	tr|Q39910|Q39910_LINPO	Luciferin binding protein OS=Lingulodinium polyedrum PE=2 SV=1	1	76.2	19	20	681	WRAMVESIR
27	tr|Q39910|Q39910_LINPO	Luciferin binding protein OS=Lingulodinium polyedrum PE=2 SV=1	1	76.2	19	20	681	AAQTGANAIQATGAAPAPSTKVVGMGWTSQEITTTDADGL
27	tr|Q39910|Q39910_LINPO	Luciferin binding protein OS=Lingulodinium polyedrum PE=2 SV=1	1	76.2	19	20	681	SKVDGFRVQWDM[147]P
27	tr|Q39910|Q39910_LINPO	Luciferin binding protein OS=Lingulodinium polyedrum PE=2 SV=1	1	76.2	19	20	681	VIDRPGFLAR
27	tr|Q39910|Q39910_LINPO	Luciferin binding protein OS=Lingulodinium polyedrum PE=2 SV=1	1	76.2	19	20	681	AAQTGANAIQATGAAPA
28	tr|Q39911|Q39911_LINPO	Luciferin binding protein OS=Lingulodinium polyedrum PE=2 SV=1	1	77	48	48	685	AMLESIREPS
28	tr|Q39911|Q39911_LINPO	Luciferin binding protein OS=Lingulodinium polyedrum PE=2 SV=1	1	77	48	48	685	NPAESGM[147]KVDNVTIRD
28	tr|Q39911|Q39911_LINPO	Luciferin binding protein OS=Lingulodinium polyedrum PE=2 SV=1	1	77	48	48	685	SDNVRVM[147]ESAQEITYRPVKGR
28	tr|Q39911|Q39911_LINPO	Luciferin binding protein OS=Lingulodinium polyedrum PE=2 SV=1	1	77	48	48	685	GQLVQFLANEGK
28	tr|Q39911|Q39911_LINPO	Luciferin binding protein OS=Lingulodinium polyedrum PE=2 SV=1	1	77	48	48	685	M[147]ESAQEITYRPVKGR
28	tr|Q39911|Q39911_LINPO	Luciferin binding protein OS=Lingulodinium polyedrum PE=2 SV=1	1	77	48	48	685	GVQDDILAQVAPFNADLSKPDAKIQ
28	tr|Q39911|Q39911_LINPO	Luciferin binding protein OS=Lingulodinium polyedrum PE=2 SV=1	1	77	48	48	685	VYRVVDSTTK
28	tr|Q39911|Q39911_LINPO	Luciferin binding protein OS=Lingulodinium polyedrum PE=2 SV=1	1	77	48	48	685	GM[147]KVDNVTIRDM[147]PGYMQR
28	tr|Q39911|Q39911_LINPO	Luciferin binding protein OS=Lingulodinium polyedrum PE=2 SV=1	1	77	48	48	685	WTAPYDIARK
28	tr|Q39911|Q39911_LINPO	Luciferin binding protein OS=Lingulodinium polyedrum PE=2 SV=1	1	77	48	48	685	DCNGYVERKM[147]TLT
28	tr|Q39911|Q39911_LINPO	Luciferin binding protein OS=Lingulodinium polyedrum PE=2 SV=1	1	77	48	48	685	YWQTPLEPVEQM[147]FR
28	tr|Q39911|Q39911_LINPO	Luciferin binding protein OS=Lingulodinium polyedrum PE=2 SV=1	1	77	48	48	685	TIRDM[147]PGYMQR
28	tr|Q39911|Q39911_LINPO	Luciferin binding protein OS=Lingulodinium polyedrum PE=2 SV=1	1	77	48	48	685	RQEADGFRVQWDM[147]PK
28	tr|Q39911|Q39911_LINPO	Luciferin binding protein OS=Lingulodinium polyedrum PE=2 SV=1	1	77	48	48	685	AM[147]LESIREPSR
28	tr|Q39911|Q39911_LINPO	Luciferin binding protein OS=Lingulodinium polyedrum PE=2 SV=1	1	77	48	48	685	EADGFRVQWDMPK
28	tr|Q39911|Q39911_LINPO	Luciferin binding protein OS=Lingulodinium polyedrum PE=2 SV=1	1	77	48	48	685	VFAIRTDPLRM[147]EMFSR
28	tr|Q39911|Q39911_LINPO	Luciferin binding protein OS=Lingulodinium polyedrum PE=2 SV=1	1	77	48	48	685	STNDVIGYGLASKPVADITQDSLWK
28	tr|Q39911|Q39911_LINPO	Luciferin binding protein OS=Lingulodinium polyedrum PE=2 SV=1	1	77	48	48	685	SGMKVDNVTIRDMPGYMQR
28	tr|Q39911|Q39911_LINPO	Luciferin binding protein OS=Lingulodinium polyedrum PE=2 SV=1	1	77	48	48	685	DM[147]DGLWEALIYKAR
28	tr|Q39911|Q39911_LINPO	Luciferin binding protein OS=Lingulodinium polyedrum PE=2 SV=1	1	77	48	48	685	RLNWTAPYDIAR
28	tr|Q39911|Q39911_LINPO	Luciferin binding protein OS=Lingulodinium polyedrum PE=2 SV=1	1	77	48	48	685	RMDSTPPTTIGYGITSDPI
29	tr|Q39913|Q39913_LINPO	Luciferin-binding protein OS=Lingulodinium polyedrum PE=4 SV=1	1	77.8	18	19	680	AAQTGANAIQATGAAPAPSTK
29	tr|Q39913|Q39913_LINPO	Luciferin-binding protein OS=Lingulodinium polyedrum PE=4 SV=1	1	77.8	18	19	680	LLDMPGTPTVTDNVR
29	tr|Q39913|Q39913_LINPO	Luciferin-binding protein OS=Lingulodinium polyedrum PE=4 SV=1	1	77.8	18	19	680	LNWQAPYAIAR
29	tr|Q39913|Q39913_LINPO	Luciferin-binding protein OS=Lingulodinium polyedrum PE=4 SV=1	1	77.8	18	19	680	AMVESIREPAR
29	tr|Q39913|Q39913_LINPO	Luciferin-binding protein OS=Lingulodinium polyedrum PE=4 SV=1	1	77.8	18	19	680	ECSYDSLLTAIQASIKQP
29	tr|Q39913|Q39913_LINPO	Luciferin-binding protein OS=Lingulodinium polyedrum PE=4 SV=1	1	77.8	18	19	680	FEWLAPSSVANDVFNSVTSLAQ
29	tr|Q39913|Q39913_LINPO	Luciferin-binding protein OS=Lingulodinium polyedrum PE=4 SV=1	1	77.8	18	19	680	GM[147]GWTSQEITTTDADASLKPWSTRRATR
29	tr|Q39913|Q39913_LINPO	Luciferin-binding protein OS=Lingulodinium polyedrum PE=4 SV=1	1	77.8	18	19	680	RSM[147]RLLDM[147]PGTPTVTDNVR
29	tr|Q39913|Q39913_LINPO	Luciferin-binding protein OS=Lingulodinium polyedrum PE=4 SV=1	1	77.8	18	19	680	VDGFRVQWDM[147]PRSAPLN
29	tr|Q39913|Q39913_LINPO	Luciferin-binding protein OS=Lingulodinium polyedrum PE=4 SV=1	1	77.8	18	19	680	VQWDM[147]PRSAPL
29	tr|Q39913|Q39913_LINPO	Luciferin-binding protein OS=Lingulodinium polyedrum PE=4 SV=1	1	77.8	18	19	680	ELIGIAGK
29	tr|Q39913|Q39913_LINPO	Luciferin-binding protein OS=Lingulodinium polyedrum PE=4 SV=1	1	77.8	18	19	680	GQLVQFLANEGK
29	tr|Q39913|Q39913_LINPO	Luciferin-binding protein OS=Lingulodinium polyedrum PE=4 SV=1	1	77.8	18	19	680	LKATGECVLER
29	tr|Q39913|Q39913_LINPO	Luciferin-binding protein OS=Lingulodinium polyedrum PE=4 SV=1	1	77.8	18	19	680	VYRVVDSTTK
29	tr|Q39913|Q39913_LINPO	Luciferin-binding protein OS=Lingulodinium polyedrum PE=4 SV=1	1	77.8	18	19	680	LTSVSDFANYFTSSEF
29	tr|Q39913|Q39913_LINPO	Luciferin-binding protein OS=Lingulodinium polyedrum PE=4 SV=1	1	77.8	18	19	680	QLVRAMVESIREPAR
29	tr|Q39913|Q39913_LINPO	Luciferin-binding protein OS=Lingulodinium polyedrum PE=4 SV=1	1	77.8	18	19	680	TACQVTDCNGYVERKMTLK
29	tr|Q39913|Q39913_LINPO	Luciferin-binding protein OS=Lingulodinium polyedrum PE=4 SV=1	1	77.8	18	19	680	TTDADASLKPWSTR
29	tr|Q39913|Q39913_LINPO	Luciferin-binding protein OS=Lingulodinium polyedrum PE=4 SV=1	1	77.8	18	19	680	TIRDM[147]PGYMQR
29	tr|Q39913|Q39913_LINPO	Luciferin-binding protein OS=Lingulodinium polyedrum PE=4 SV=1	1	77.8	18	19	680	AAQTGANAIQATGAAP
29	tr|Q39913|Q39913_LINPO	Luciferin-binding protein OS=Lingulodinium polyedrum PE=4 SV=1	1	77.8	18	19	680	TLTANGVTYTDNIYDDEASCEIVY
29	tr|Q39913|Q39913_LINPO	Luciferin-binding protein OS=Lingulodinium polyedrum PE=4 SV=1	1	77.8	18	19	680	AAWKAAQTGANAIQATGAAP
29	tr|Q39913|Q39913_LINPO	Luciferin-binding protein OS=Lingulodinium polyedrum PE=4 SV=1	1	77.8	18	19	680	AVDAFVREAKR
29	tr|Q39913|Q39913_LINPO	Luciferin-binding protein OS=Lingulodinium polyedrum PE=4 SV=1	1	77.8	18	19	680	AAQTGANAIQATGAAPA
29	tr|Q39913|Q39913_LINPO	Luciferin-binding protein OS=Lingulodinium polyedrum PE=4 SV=1	1	77.8	18	19	680	RMDSTPPTTIGYGITSDPI
30	tr|Q42812|Q42812_LINPO	Serine/threonine-protein phosphatase OS=Lingulodinium polyedrum GN=PP1 PE=2 SV=1	1	74.8	24	25	308	RALVTIFSAPNYCGEFDNAGAIMTV
30	tr|Q42812|Q42812_LINPO	Serine/threonine-protein phosphatase OS=Lingulodinium polyedrum GN=PP1 PE=2 SV=1	1	74.8	24	25	308	ILRPLTRM[147]GVP
30	tr|Q42812|Q42812_LINPO	Serine/threonine-protein phosphatase OS=Lingulodinium polyedrum GN=PP1 PE=2 SV=1	1	74.8	24	25	308	MTVDESFCCAFQILRPLTR
30	tr|Q42812|Q42812_LINPO	Serine/threonine-protein phosphatase OS=Lingulodinium polyedrum GN=PP1 PE=2 SV=1	1	74.8	24	25	308	VPDTGLLCDLLWSDPEK
30	tr|Q42812|Q42812_LINPO	Serine/threonine-protein phosphatase OS=Lingulodinium polyedrum GN=PP1 PE=2 SV=1	1	74.8	24	25	308	AHQVVEDGYEFFARR
30	tr|Q42812|Q42812_LINPO	Serine/threonine-protein phosphatase OS=Lingulodinium polyedrum GN=PP1 PE=2 SV=1	1	74.8	24	25	308	CMHGGLSPELSNLEQIKR
31	tr|Q5SDR2|Q5SDR2_LINPO	Mitotic cyclin 1 (Fragment) OS=Lingulodinium polyedrum GN=Cyc1 PE=2 SV=1	1	60.7	33	33	484	EYTSDVMRSM[147]LQREEHFMPR
31	tr|Q5SDR2|Q5SDR2_LINPO	Mitotic cyclin 1 (Fragment) OS=Lingulodinium polyedrum GN=Cyc1 PE=2 SV=1	1	60.7	33	33	484	ILAALHFESQHPELAHAGGLPPPA
31	tr|Q5SDR2|Q5SDR2_LINPO	Mitotic cyclin 1 (Fragment) OS=Lingulodinium polyedrum GN=Cyc1 PE=2 SV=1	1	60.7	33	33	484	RAWQAAQARPADAAAAP
31	tr|Q5SDR2|Q5SDR2_LINPO	Mitotic cyclin 1 (Fragment) OS=Lingulodinium polyedrum GN=Cyc1 PE=2 SV=1	1	60.7	33	33	484	TRVATAAGDEPK
31	tr|Q5SDR2|Q5SDR2_LINPO	Mitotic cyclin 1 (Fragment) OS=Lingulodinium polyedrum GN=Cyc1 PE=2 SV=1	1	60.7	33	33	484	RAWQAAQARPADAAAAP
31	tr|Q5SDR2|Q5SDR2_LINPO	Mitotic cyclin 1 (Fragment) OS=Lingulodinium polyedrum GN=Cyc1 PE=2 SV=1	1	60.7	33	33	484	QAAAVAERVER
31	tr|Q5SDR2|Q5SDR2_LINPO	Mitotic cyclin 1 (Fragment) OS=Lingulodinium polyedrum GN=Cyc1 PE=2 SV=1	1	60.7	33	33	484	AWQAAQARPADAAAAPQAAAV
31	tr|Q5SDR2|Q5SDR2_LINPO	Mitotic cyclin 1 (Fragment) OS=Lingulodinium polyedrum GN=Cyc1 PE=2 SV=1	1	60.7	33	33	484	IAAKFEEIEPPELADLVYVTADSYTK
31	tr|Q5SDR2|Q5SDR2_LINPO	Mitotic cyclin 1 (Fragment) OS=Lingulodinium polyedrum GN=Cyc1 PE=2 SV=1	1	60.7	33	33	484	HSWAADVLSGGPPR
31	tr|Q5SDR2|Q5SDR2_LINPO	Mitotic cyclin 1 (Fragment) OS=Lingulodinium polyedrum GN=Cyc1 PE=2 SV=1	1	60.7	33	33	484	QSTPHAPMSAHSWAADVLSG
31	tr|Q5SDR2|Q5SDR2_LINPO	Mitotic cyclin 1 (Fragment) OS=Lingulodinium polyedrum GN=Cyc1 PE=2 SV=1	1	60.7	33	33	484	RAPSTAGAGCEVPR
32	tr|Q6TDT2|Q6TDT2_LINPO	Actin OS=Lingulodinium polyedrum PE=2 SV=1	1	88.3	65	68	383	AVFPSIVGR
32	tr|Q6TDT2|Q6TDT2_LINPO	Actin OS=Lingulodinium polyedrum PE=2 SV=1	1	88.3	65	68	383	DLTDYLM[147]K
32	tr|Q6TDT2|Q6TDT2_LINPO	Actin OS=Lingulodinium polyedrum PE=2 SV=1	1	88.3	65	68	383	ELTALAPSTM[147]K
32	tr|Q6TDT2|Q6TDT2_LINPO	Actin OS=Lingulodinium polyedrum PE=2 SV=1	1	88.3	65	68	383	GDEEVAALVVDNGSGM[147]CK
32	tr|Q6TDT2|Q6TDT2_LINPO	Actin OS=Lingulodinium polyedrum PE=2 SV=1	1	88.3	65	68	383	GYSFTTTAER
32	tr|Q6TDT2|Q6TDT2_LINPO	Actin OS=Lingulodinium polyedrum PE=2 SV=1	1	88.3	65	68	383	LCYIALDYDSEM[147]K
32	tr|Q6TDT2|Q6TDT2_LINPO	Actin OS=Lingulodinium polyedrum PE=2 SV=1	1	88.3	65	68	383	IWHHTFYNELR
32	tr|Q6TDT2|Q6TDT2_LINPO	Actin OS=Lingulodinium polyedrum PE=2 SV=1	1	88.3	65	68	383	TEYDEAGPSIVHR
32	tr|Q6TDT2|Q6TDT2_LINPO	Actin OS=Lingulodinium polyedrum PE=2 SV=1	1	88.3	65	68	383	TYELPDGNIITVGSER
32	tr|Q6TDT2|Q6TDT2_LINPO	Actin OS=Lingulodinium polyedrum PE=2 SV=1	1	88.3	65	68	383	VAPEEHPVLLTEAPLNPK
32	tr|Q6TDT2|Q6TDT2_LINPO	Actin OS=Lingulodinium polyedrum PE=2 SV=1	1	88.3	65	68	383	AVFPSIVGRPK
32	tr|Q6TDT2|Q6TDT2_LINPO	Actin OS=Lingulodinium polyedrum PE=2 SV=1	1	88.3	65	68	383	FRCPEVLFQPSLVGK
32	tr|Q6TDT2|Q6TDT2_LINPO	Actin OS=Lingulodinium polyedrum PE=2 SV=1	1	88.3	65	68	383	KDSYIGDEAQSKR
32	tr|Q6TDT2|Q6TDT2_LINPO	Actin OS=Lingulodinium polyedrum PE=2 SV=1	1	88.3	65	68	383	RVAPEEHPVLLTEAPLNPK
32	tr|Q6TDT2|Q6TDT2_LINPO	Actin OS=Lingulodinium polyedrum PE=2 SV=1	1	88.3	65	68	383	TEYDEAGPSIVHR
32	tr|Q6TDT2|Q6TDT2_LINPO	Actin OS=Lingulodinium polyedrum PE=2 SV=1	1	88.3	65	68	383	VAPEEHPVLLTEAPLNPK
32	tr|Q6TDT2|Q6TDT2_LINPO	Actin OS=Lingulodinium polyedrum PE=2 SV=1	1	88.3	65	68	383	DSEMKAATESSDKEK
32	tr|Q6TDT2|Q6TDT2_LINPO	Actin OS=Lingulodinium polyedrum PE=2 SV=1	1	88.3	65	68	383	CPEVLFQPSLVGKE
32	tr|Q6TDT2|Q6TDT2_LINPO	Actin OS=Lingulodinium polyedrum PE=2 SV=1	1	88.3	65	68	383	M[147]PGIM[147]VGM[147]DQKDSYIGDEAQSKR
32	tr|Q6TDT2|Q6TDT2_LINPO	Actin OS=Lingulodinium polyedrum PE=2 SV=1	1	88.3	65	68	383	DLTDYLM[147]KILTERGYSF
32	tr|Q6TDT2|Q6TDT2_LINPO	Actin OS=Lingulodinium polyedrum PE=2 SV=1	1	88.3	65	68	383	LDLAGRDLTDYLM[147]KILTER
32	tr|Q6TDT2|Q6TDT2_LINPO	Actin OS=Lingulodinium polyedrum PE=2 SV=1	1	88.3	65	68	383	ANRERMTQIMFETFNV
32	tr|Q6TDT2|Q6TDT2_LINPO	Actin OS=Lingulodinium polyedrum PE=2 SV=1	1	88.3	65	68	383	LDLAGRDLTDYLMK
32	tr|Q6TDT2|Q6TDT2_LINPO	Actin OS=Lingulodinium polyedrum PE=2 SV=1	1	88.3	65	68	383	QMWITKTEYDEAGPSIVHR
32	tr|Q6TDT2|Q6TDT2_LINPO	Actin OS=Lingulodinium polyedrum PE=2 SV=1	1	88.3	65	68	383	IM[147]KCDVDIRK
32	tr|Q6TDT2|Q6TDT2_LINPO	Actin OS=Lingulodinium polyedrum PE=2 SV=1	1	88.3	65	68	383	MGDEEVAALVVDNGSGMCKAGFAGDDAPRAV
32	tr|Q6TDT2|Q6TDT2_LINPO	Actin OS=Lingulodinium polyedrum PE=2 SV=1	1	88.3	65	68	383	CPEVLFQPSLVGK
32	tr|Q6TDT2|Q6TDT2_LINPO	Actin OS=Lingulodinium polyedrum PE=2 SV=1	1	88.3	65	68	383	M[147]TQIM[147]FETFNVPAMYVAIQA
32	tr|Q6TDT2|Q6TDT2_LINPO	Actin OS=Lingulodinium polyedrum PE=2 SV=1	1	88.3	65	68	383	ERM[147]TQIM[147]FETFNV
32	tr|Q6TDT2|Q6TDT2_LINPO	Actin OS=Lingulodinium polyedrum PE=2 SV=1	1	88.3	65	68	383	KM[147]PGIM[147]VGMDQK
32	tr|Q6TDT2|Q6TDT2_LINPO	Actin OS=Lingulodinium polyedrum PE=2 SV=1	1	88.3	65	68	383	KDLYANVVLSGGTTM[147]FIGIGE
32	tr|Q6TDT2|Q6TDT2_LINPO	Actin OS=Lingulodinium polyedrum PE=2 SV=1	1	88.3	65	68	383	DVKEKLCYIALDYDSEMK
32	tr|Q6TDT2|Q6TDT2_LINPO	Actin OS=Lingulodinium polyedrum PE=2 SV=1	1	88.3	65	68	383	AGFAGDDAPRAVFPSIVG
32	tr|Q6TDT2|Q6TDT2_LINPO	Actin OS=Lingulodinium polyedrum PE=2 SV=1	1	88.3	65	68	383	STM[147]KIKVVAPPER
32	tr|Q6TDT2|Q6TDT2_LINPO	Actin OS=Lingulodinium polyedrum PE=2 SV=1	1	88.3	65	68	383	WIGGSILSSLSTFQQM[147]WITKTEYDEAGPSIVHR
33	tr|Q6TDT3|Q6TDT3_LINPO	Cell surface protein p43 OS=Lingulodinium polyedrum PE=2 SV=1	1	66.4	25	25	406	LLAVSGVSAWM[147]GSHSR
33	tr|Q6TDT3|Q6TDT3_LINPO	Cell surface protein p43 OS=Lingulodinium polyedrum PE=2 SV=1	1	66.4	25	25	406	CFAVYVEDNGSPK
33	tr|Q6TDT3|Q6TDT3_LINPO	Cell surface protein p43 OS=Lingulodinium polyedrum PE=2 SV=1	1	66.4	25	25	406	KTTVSDWKIGV
33	tr|Q6TDT3|Q6TDT3_LINPO	Cell surface protein p43 OS=Lingulodinium polyedrum PE=2 SV=1	1	66.4	25	25	406	LMPVPPQGAFL
33	tr|Q6TDT3|Q6TDT3_LINPO	Cell surface protein p43 OS=Lingulodinium polyedrum PE=2 SV=1	1	66.4	25	25	406	KSPTEAECKPYCPKTGPCTVLT
33	tr|Q6TDT3|Q6TDT3_LINPO	Cell surface protein p43 OS=Lingulodinium polyedrum PE=2 SV=1	1	66.4	25	25	406	GVSAWMGSHSR
34	tr|Q84U55|Q84U55_LINPO	Histone-like protein OS=Lingulodinium polyedrum PE=2 SV=1	1	42.3	5	5	106	LINSLAEIATK
34	tr|Q84U55|Q84U55_LINPO	Histone-like protein OS=Lingulodinium polyedrum PE=2 SV=1	1	42.3	5	5	106	GAIADALATQFEL
35	tr|Q9ARD8|Q9ARD8_LINPO	Delta-aminolevulinic acid dehydratase (Fragment) OS=Lingulodinium polyedrum GN=hemB PE=2 SV=1	1	69.6	20	20	275	LDEEEGADILMVKPGM[147]PYLDV
35	tr|Q9ARD8|Q9ARD8_LINPO	Delta-aminolevulinic acid dehydratase (Fragment) OS=Lingulodinium polyedrum GN=hemB PE=2 SV=1	1	69.6	20	20	275	IAAYHVSGEYAMLK
35	tr|Q9ARD8|Q9ARD8_LINPO	Delta-aminolevulinic acid dehydratase (Fragment) OS=Lingulodinium polyedrum GN=hemB PE=2 SV=1	1	69.6	20	20	275	SGEYAMLKAAALNGWLDEK
35	tr|Q9ARD8|Q9ARD8_LINPO	Delta-aminolevulinic acid dehydratase (Fragment) OS=Lingulodinium polyedrum GN=hemB PE=2 SV=1	1	69.6	20	20	275	SNLPIAAYHVSGEYAM[147]LK
35	tr|Q9ARD8|Q9ARD8_LINPO	Delta-aminolevulinic acid dehydratase (Fragment) OS=Lingulodinium polyedrum GN=hemB PE=2 SV=1	1	69.6	20	20	275	QAVSQAEAGADYVSPSDM[147]MDGRV
36	tr|Q9AXR7|Q9AXR7_LINPO	Superoxide dismutase OS=Lingulodinium polyedrum GN=fesod1 PE=2 SV=1	1	92.2	21	21	234	GGQFGSGWAWLVADKEGK
36	tr|Q9AXR7|Q9AXR7_LINPO	Superoxide dismutase OS=Lingulodinium polyedrum GN=fesod1 PE=2 SV=1	1	92.2	21	21	234	HHNAYVTNLNK
36	tr|Q9AXR7|Q9AXR7_LINPO	Superoxide dismutase OS=Lingulodinium polyedrum GN=fesod1 PE=2 SV=1	1	92.2	21	21	234	EGKLKVFQTHDAGCPLTEGLT
36	tr|Q9AXR7|Q9AXR7_LINPO	Superoxide dismutase OS=Lingulodinium polyedrum GN=fesod1 PE=2 SV=1	1	92.2	21	21	234	EHAFYIDYKNDKAK
36	tr|Q9AXR7|Q9AXR7_LINPO	Superoxide dismutase OS=Lingulodinium polyedrum GN=fesod1 PE=2 SV=1	1	92.2	21	21	234	VAELIERDFGSYEEFATQFKAAG
36	tr|Q9AXR7|Q9AXR7_LINPO	Superoxide dismutase OS=Lingulodinium polyedrum GN=fesod1 PE=2 SV=1	1	92.2	21	21	234	HINQQTLEFHYGK
36	tr|Q9AXR7|Q9AXR7_LINPO	Superoxide dismutase OS=Lingulodinium polyedrum GN=fesod1 PE=2 SV=1	1	92.2	21	21	234	HHNAYVTNLNKLIEGTDLANA
36	tr|Q9AXR7|Q9AXR7_LINPO	Superoxide dismutase OS=Lingulodinium polyedrum GN=fesod1 PE=2 SV=1	1	92.2	21	21	234	FKAAGGGQFGSGWAWLVADKEGK
36	tr|Q9AXR7|Q9AXR7_LINPO	Superoxide dismutase OS=Lingulodinium polyedrum GN=fesod1 PE=2 SV=1	1	92.2	21	21	234	GAVNWDFVASNFPQGELR
36	tr|Q9AXR7|Q9AXR7_LINPO	Superoxide dismutase OS=Lingulodinium polyedrum GN=fesod1 PE=2 SV=1	1	92.2	21	21	234	FPQGELRASK
37	tr|X2D8N9|X2D8N9_LINPO	Class II fructose-1,6-bisphosphate aldolase OS=Lingulodinium polyedrum GN=FBA-II PE=2 SV=1	1	76.5	48	49	476	ALVDLLNYAK
37	tr|X2D8N9|X2D8N9_LINPO	Class II fructose-1,6-bisphosphate aldolase OS=Lingulodinium polyedrum GN=FBA-II PE=2 SV=1	1	76.5	48	49	476	AM[147]QDLNCVDRL
37	tr|X2D8N9|X2D8N9_LINPO	Class II fructose-1,6-bisphosphate aldolase OS=Lingulodinium polyedrum GN=FBA-II PE=2 SV=1	1	76.5	48	49	476	MPASVKPGVVTGK
37	tr|X2D8N9|X2D8N9_LINPO	Class II fructose-1,6-bisphosphate aldolase OS=Lingulodinium polyedrum GN=FBA-II PE=2 SV=1	1	76.5	48	49	476	HGGSGSSEEDIQYAIKAGVIK
37	tr|X2D8N9|X2D8N9_LINPO	Class II fructose-1,6-bisphosphate aldolase OS=Lingulodinium polyedrum GN=FBA-II PE=2 SV=1	1	76.5	48	49	476	LRAFVAPATGGVATSHEGQQAR
37	tr|X2D8N9|X2D8N9_LINPO	Class II fructose-1,6-bisphosphate aldolase OS=Lingulodinium polyedrum GN=FBA-II PE=2 SV=1	1	76.5	48	49	476	MPASVKPGVVTGK
37	tr|X2D8N9|X2D8N9_LINPO	Class II fructose-1,6-bisphosphate aldolase OS=Lingulodinium polyedrum GN=FBA-II PE=2 SV=1	1	76.5	48	49	476	M[147]PSKVGSLAVVGAGACG
37	tr|X2D8N9|X2D8N9_LINPO	Class II fructose-1,6-bisphosphate aldolase OS=Lingulodinium polyedrum GN=FBA-II PE=2 SV=1	1	76.5	48	49	476	QGQIGNPEGPEKPNKKYYDPR
37	tr|X2D8N9|X2D8N9_LINPO	Class II fructose-1,6-bisphosphate aldolase OS=Lingulodinium polyedrum GN=FBA-II PE=2 SV=1	1	76.5	48	49	476	TVAELYGVPVILHTDHCQK
37	tr|X2D8N9|X2D8N9_LINPO	Class II fructose-1,6-bisphosphate aldolase OS=Lingulodinium polyedrum GN=FBA-II PE=2 SV=1	1	76.5	48	49	476	YLERM[147]AKVDLLLEMELGITGGEEDGV
37	tr|X2D8N9|X2D8N9_LINPO	Class II fructose-1,6-bisphosphate aldolase OS=Lingulodinium polyedrum GN=FBA-II PE=2 SV=1	1	76.5	48	49	476	M[147]PGVNIVGTSSINACM[147]EAAK
37	tr|X2D8N9|X2D8N9_LINPO	Class II fructose-1,6-bisphosphate aldolase OS=Lingulodinium polyedrum GN=FBA-II PE=2 SV=1	1	76.5	48	49	476	AWLPWFEGLLKANEDYYAKNG
37	tr|X2D8N9|X2D8N9_LINPO	Class II fructose-1,6-bisphosphate aldolase OS=Lingulodinium polyedrum GN=FBA-II PE=2 SV=1	1	76.5	48	49	476	ENEFAM[147]PGVNIVGTSSINACM[147]EAA
37	tr|X2D8N9|X2D8N9_LINPO	Class II fructose-1,6-bisphosphate aldolase OS=Lingulodinium polyedrum GN=FBA-II PE=2 SV=1	1	76.5	48	49	476	QIGNPEGPEKPNK
37	tr|X2D8N9|X2D8N9_LINPO	Class II fructose-1,6-bisphosphate aldolase OS=Lingulodinium polyedrum GN=FBA-II PE=2 SV=1	1	76.5	48	49	476	EFAM[147]PGVNIVGTSSINACMEAAKK
37	tr|X2D8N9|X2D8N9_LINPO	Class II fructose-1,6-bisphosphate aldolase OS=Lingulodinium polyedrum GN=FBA-II PE=2 SV=1	1	76.5	48	49	476	GEVSMADRLVK
37	tr|X2D8N9|X2D8N9_LINPO	Class II fructose-1,6-bisphosphate aldolase OS=Lingulodinium polyedrum GN=FBA-II PE=2 SV=1	1	76.5	48	49	476	VKAM[147]QDLNCVDR
37	tr|X2D8N9|X2D8N9_LINPO	Class II fructose-1,6-bisphosphate aldolase OS=Lingulodinium polyedrum GN=FBA-II PE=2 SV=1	1	76.5	48	49	476	KNKDYLQGQI
37	tr|X2D8N9|X2D8N9_LINPO	Class II fructose-1,6-bisphosphate aldolase OS=Lingulodinium polyedrum GN=FBA-II PE=2 SV=1	1	76.5	48	49	476	MPSKVGSLAVVG
37	tr|X2D8N9|X2D8N9_LINPO	Class II fructose-1,6-bisphosphate aldolase OS=Lingulodinium polyedrum GN=FBA-II PE=2 SV=1	1	76.5	48	49	476	LRRQPQQASQEWEQGAADTTSSYGSAW
38	tr|X2D9V1|X2D9V1_LINPO	Class II fructose-1,6-bisphosphate aldolase OS=Lingulodinium polyedrum GN=FBA-II PE=2 SV=1	1	74.1	49	50	475	ALVDLLNYAK
38	tr|X2D9V1|X2D9V1_LINPO	Class II fructose-1,6-bisphosphate aldolase OS=Lingulodinium polyedrum GN=FBA-II PE=2 SV=1	1	74.1	49	50	475	AM[147]QDLNCVDRL
38	tr|X2D9V1|X2D9V1_LINPO	Class II fructose-1,6-bisphosphate aldolase OS=Lingulodinium polyedrum GN=FBA-II PE=2 SV=1	1	74.1	49	50	475	MPASVKPGVVTGK
38	tr|X2D9V1|X2D9V1_LINPO	Class II fructose-1,6-bisphosphate aldolase OS=Lingulodinium polyedrum GN=FBA-II PE=2 SV=1	1	74.1	49	50	475	MPASVKPGVVTGK
38	tr|X2D9V1|X2D9V1_LINPO	Class II fructose-1,6-bisphosphate aldolase OS=Lingulodinium polyedrum GN=FBA-II PE=2 SV=1	1	74.1	49	50	475	MPSKVGSLAIVGAGACGAGAA
38	tr|X2D9V1|X2D9V1_LINPO	Class II fructose-1,6-bisphosphate aldolase OS=Lingulodinium polyedrum GN=FBA-II PE=2 SV=1	1	74.1	49	50	475	QGQIGNPEGPEKPNKKYYDPR
38	tr|X2D9V1|X2D9V1_LINPO	Class II fructose-1,6-bisphosphate aldolase OS=Lingulodinium polyedrum GN=FBA-II PE=2 SV=1	1	74.1	49	50	475	TVAELYGVPVILHTDHCQK
38	tr|X2D9V1|X2D9V1_LINPO	Class II fructose-1,6-bisphosphate aldolase OS=Lingulodinium polyedrum GN=FBA-II PE=2 SV=1	1	74.1	49	50	475	YLERM[147]AKVDLLLEMELGITGGEEDGV
38	tr|X2D9V1|X2D9V1_LINPO	Class II fructose-1,6-bisphosphate aldolase OS=Lingulodinium polyedrum GN=FBA-II PE=2 SV=1	1	74.1	49	50	475	KAFAKM[147]PASVKPGVV
38	tr|X2D9V1|X2D9V1_LINPO	Class II fructose-1,6-bisphosphate aldolase OS=Lingulodinium polyedrum GN=FBA-II PE=2 SV=1	1	74.1	49	50	475	M[147]PGVNIVGTSSINACM[147]EAAK
38	tr|X2D9V1|X2D9V1_LINPO	Class II fructose-1,6-bisphosphate aldolase OS=Lingulodinium polyedrum GN=FBA-II PE=2 SV=1	1	74.1	49	50	475	AWLPWFEGLLKANEDYYAKNG
38	tr|X2D9V1|X2D9V1_LINPO	Class II fructose-1,6-bisphosphate aldolase OS=Lingulodinium polyedrum GN=FBA-II PE=2 SV=1	1	74.1	49	50	475	ENEFAM[147]PGVNIVGTSSINACM[147]EAA
38	tr|X2D9V1|X2D9V1_LINPO	Class II fructose-1,6-bisphosphate aldolase OS=Lingulodinium polyedrum GN=FBA-II PE=2 SV=1	1	74.1	49	50	475	QIGNPEGPEKPNK
38	tr|X2D9V1|X2D9V1_LINPO	Class II fructose-1,6-bisphosphate aldolase OS=Lingulodinium polyedrum GN=FBA-II PE=2 SV=1	1	74.1	49	50	475	LRRQQQQLQEPEQEAAAGASFSHG
38	tr|X2D9V1|X2D9V1_LINPO	Class II fructose-1,6-bisphosphate aldolase OS=Lingulodinium polyedrum GN=FBA-II PE=2 SV=1	1	74.1	49	50	475	EFAM[147]PGVNIVGTSSINACMEAAKK
38	tr|X2D9V1|X2D9V1_LINPO	Class II fructose-1,6-bisphosphate aldolase OS=Lingulodinium polyedrum GN=FBA-II PE=2 SV=1	1	74.1	49	50	475	ALRAFVAPAAGGAATGHEGQRVR
38	tr|X2D9V1|X2D9V1_LINPO	Class II fructose-1,6-bisphosphate aldolase OS=Lingulodinium polyedrum GN=FBA-II PE=2 SV=1	1	74.1	49	50	475	AAGASFSHGGALM[147]LGAAAAAVGAAQAGK
38	tr|X2D9V1|X2D9V1_LINPO	Class II fructose-1,6-bisphosphate aldolase OS=Lingulodinium polyedrum GN=FBA-II PE=2 SV=1	1	74.1	49	50	475	ANEDYYAKNGEPLFSSHM[147]LDLSEEPLEENVAICK
38	tr|X2D9V1|X2D9V1_LINPO	Class II fructose-1,6-bisphosphate aldolase OS=Lingulodinium polyedrum GN=FBA-II PE=2 SV=1	1	74.1	49	50	475	PLFSSHM[147]LDLSEEPLEENVAICKKYLER
38	tr|X2D9V1|X2D9V1_LINPO	Class II fructose-1,6-bisphosphate aldolase OS=Lingulodinium polyedrum GN=FBA-II PE=2 SV=1	1	74.1	49	50	475	GEVSMADRLVK
38	tr|X2D9V1|X2D9V1_LINPO	Class II fructose-1,6-bisphosphate aldolase OS=Lingulodinium polyedrum GN=FBA-II PE=2 SV=1	1	74.1	49	50	475	YAKNGEPLFSSHM[147]LDLSEEPLEENVAICKK
38	tr|X2D9V1|X2D9V1_LINPO	Class II fructose-1,6-bisphosphate aldolase OS=Lingulodinium polyedrum GN=FBA-II PE=2 SV=1	1	74.1	49	50	475	VKAM[147]QDLNCVDR
38	tr|X2D9V1|X2D9V1_LINPO	Class II fructose-1,6-bisphosphate aldolase OS=Lingulodinium polyedrum GN=FBA-II PE=2 SV=1	1	74.1	49	50	475	KNKDYLQGQI
39a	sp|O77206|LUCIF_LINPO	Dinoflagellate luciferase OS=Lingulodinium polyedrum PE=1 SV=1	1	72.3	91	94	1262	AFPVGPYTFMR
39a	sp|O77206|LUCIF_LINPO	Dinoflagellate luciferase OS=Lingulodinium polyedrum PE=1 SV=1	1	72.3	91	94	1262	AFPVGPYTFM[147]R
39a	sp|O77206|LUCIF_LINPO	Dinoflagellate luciferase OS=Lingulodinium polyedrum PE=1 SV=1	1	72.3	91	94	1262	DNAPTNLGKPYPTLAK
39a	sp|O77206|LUCIF_LINPO	Dinoflagellate luciferase OS=Lingulodinium polyedrum PE=1 SV=1	1	72.3	91	94	1262	INQFGDVCTVDASVAK
39a	sp|O77206|LUCIF_LINPO	Dinoflagellate luciferase OS=Lingulodinium polyedrum PE=1 SV=1	1	72.3	91	94	1262	INQNGDVCTVDASVAK
39a	sp|O77206|LUCIF_LINPO	Dinoflagellate luciferase OS=Lingulodinium polyedrum PE=1 SV=1	1	72.3	91	94	1262	VSNDPESDPIPLQSR
39a	sp|O77206|LUCIF_LINPO	Dinoflagellate luciferase OS=Lingulodinium polyedrum PE=1 SV=1	1	72.3	91	94	1262	EVGGKISYVFYVK
39a	sp|O77206|LUCIF_LINPO	Dinoflagellate luciferase OS=Lingulodinium polyedrum PE=1 SV=1	1	72.3	91	94	1262	GMLGAAEANKIVADTDHHQTGGM[147]YLR
39a	sp|O77206|LUCIF_LINPO	Dinoflagellate luciferase OS=Lingulodinium polyedrum PE=1 SV=1	1	72.3	91	94	1262	IVADTDHHQTGGM[147]YLR
39a	sp|O77206|LUCIF_LINPO	Dinoflagellate luciferase OS=Lingulodinium polyedrum PE=1 SV=1	1	72.3	91	94	1262	MAAQLEQFLVNEGQVDQRAVTYMLKGLQ
39a	sp|O77206|LUCIF_LINPO	Dinoflagellate luciferase OS=Lingulodinium polyedrum PE=1 SV=1	1	72.3	91	94	1262	NGMHKPEFHEDGLHKPMEVGGKKFES
39a	sp|O77206|LUCIF_LINPO	Dinoflagellate luciferase OS=Lingulodinium polyedrum PE=1 SV=1	1	72.3	91	94	1262	PDNLGKPYKCTAR
39a	sp|O77206|LUCIF_LINPO	Dinoflagellate luciferase OS=Lingulodinium polyedrum PE=1 SV=1	1	72.3	91	94	1262	IVADTDHHQTGGMYLR
39a	sp|O77206|LUCIF_LINPO	Dinoflagellate luciferase OS=Lingulodinium polyedrum PE=1 SV=1	1	72.3	91	94	1262	DTGFCEKTGLESG
39a	sp|O77206|LUCIF_LINPO	Dinoflagellate luciferase OS=Lingulodinium polyedrum PE=1 SV=1	1	72.3	91	94	1262	FEAGDNKLGGALNAK
39a	sp|O77206|LUCIF_LINPO	Dinoflagellate luciferase OS=Lingulodinium polyedrum PE=1 SV=1	1	72.3	91	94	1262	VCEKGFEAGDNKLGG
39a	sp|O77206|LUCIF_LINPO	Dinoflagellate luciferase OS=Lingulodinium polyedrum PE=1 SV=1	1	72.3	91	94	1262	DGWLEKNEKEM[147]
39a	sp|O77206|LUCIF_LINPO	Dinoflagellate luciferase OS=Lingulodinium polyedrum PE=1 SV=1	1	72.3	91	94	1262	LGVWVLPEEYRKIGFFWEMESGHCFR
39a	sp|O77206|LUCIF_LINPO	Dinoflagellate luciferase OS=Lingulodinium polyedrum PE=1 SV=1	1	72.3	91	94	1262	IIADTDHHQTGGM[147]Y
39a	sp|O77206|LUCIF_LINPO	Dinoflagellate luciferase OS=Lingulodinium polyedrum PE=1 SV=1	1	72.3	91	94	1262	EVGGKISFVFYVK
39a	sp|O77206|LUCIF_LINPO	Dinoflagellate luciferase OS=Lingulodinium polyedrum PE=1 SV=1	1	72.3	91	94	1262	PTNLGKPYPTLAK
39a	sp|O77206|LUCIF_LINPO	Dinoflagellate luciferase OS=Lingulodinium polyedrum PE=1 SV=1	1	72.3	91	94	1262	LDTNKGAM[147]LDQR
39a	sp|O77206|LUCIF_LINPO	Dinoflagellate luciferase OS=Lingulodinium polyedrum PE=1 SV=1	1	72.3	91	94	1262	DNVPDSLGNPYTCEAKDLDYPIKR
39a	sp|O77206|LUCIF_LINPO	Dinoflagellate luciferase OS=Lingulodinium polyedrum PE=1 SV=1	1	72.3	91	94	1262	GM[147]LGAAEANKIVADTDHHQTGGMYLR
39a	sp|O77206|LUCIF_LINPO	Dinoflagellate luciferase OS=Lingulodinium polyedrum PE=1 SV=1	1	72.3	91	94	1262	HHQTGGM[147]YLRINQYGEVCTVDASVAK
39a	sp|O77206|LUCIF_LINPO	Dinoflagellate luciferase OS=Lingulodinium polyedrum PE=1 SV=1	1	72.3	91	94	1262	TGLESGGVAHGGALNAAQVAHLDEDAFKG
39a	sp|O77206|LUCIF_LINPO	Dinoflagellate luciferase OS=Lingulodinium polyedrum PE=1 SV=1	1	72.3	91	94	1262	YGDNFKNGM[147]HKPEFHEDGL
39a	sp|O77206|LUCIF_LINPO	Dinoflagellate luciferase OS=Lingulodinium polyedrum PE=1 SV=1	1	72.3	91	94	1262	EAIKSGMLGAAEAK
39a	sp|O77206|LUCIF_LINPO	Dinoflagellate luciferase OS=Lingulodinium polyedrum PE=1 SV=1	1	72.3	91	94	1262	ENFKNGLHAPNFHDDGLHK
39a	sp|O77206|LUCIF_LINPO	Dinoflagellate luciferase OS=Lingulodinium polyedrum PE=1 SV=1	1	72.3	91	94	1262	GFFWEMESGRCFRIER
39a	sp|O77206|LUCIF_LINPO	Dinoflagellate luciferase OS=Lingulodinium polyedrum PE=1 SV=1	1	72.3	91	94	1262	PLHGRWITVSGGQVAFIK
39a	sp|O77206|LUCIF_LINPO	Dinoflagellate luciferase OS=Lingulodinium polyedrum PE=1 SV=1	1	72.3	91	94	1262	SGMLGAAEAKKIIADTDHHQTGG
39a	sp|O77206|LUCIF_LINPO	Dinoflagellate luciferase OS=Lingulodinium polyedrum PE=1 SV=1	1	72.3	91	94	1262	PEFHEDGLHKPM[147]EVGGKK
39a	sp|O77206|LUCIF_LINPO	Dinoflagellate luciferase OS=Lingulodinium polyedrum PE=1 SV=1	1	72.3	91	94	1262	M[147]AAQLEQFLVNEGQVDQRA
39a	sp|O77206|LUCIF_LINPO	Dinoflagellate luciferase OS=Lingulodinium polyedrum PE=1 SV=1	1	72.3	91	94	1262	DGWLEKNEKEML
39a	sp|O77206|LUCIF_LINPO	Dinoflagellate luciferase OS=Lingulodinium polyedrum PE=1 SV=1	1	72.3	91	94	1262	KIGFFWEMESGH
39a	sp|O77206|LUCIF_LINPO	Dinoflagellate luciferase OS=Lingulodinium polyedrum PE=1 SV=1	1	72.3	91	94	1262	KFESGFHYLLECHELGGKN
39a	sp|O77206|LUCIF_LINPO	Dinoflagellate luciferase OS=Lingulodinium polyedrum PE=1 SV=1	1	72.3	91	94	1262	EVQSM[147]VENLLVQANVDTTN
39a	sp|O77206|LUCIF_LINPO	Dinoflagellate luciferase OS=Lingulodinium polyedrum PE=1 SV=1	1	72.3	91	94	1262	DNAPTNLGKPYPTLAK
39b	tr|B3SGE1|B3SGE1_LINPO	Luciferase (Fragment) OS=Lingulodinium polyedrum PE=4 SV=1	0		11	11	166	DTGFCEKTGLESG
39b	tr|B3SGE1|B3SGE1_LINPO	Luciferase (Fragment) OS=Lingulodinium polyedrum PE=4 SV=1	0		11	11	166	TGLESGGVAHGGALNAAQVAHLDEDAFKG
40a	tr|F6K4W5|F6K4W5_LINPO	Cytochrome c oxidase subunit 1 (Fragment) OS=Lingulodinium polyedrum GN=COX1 PE=3 SV=1	1	37.7	15	15	492	AELGQPGTLLGDDQ
40a	tr|F6K4W5|F6K4W5_LINPO	Cytochrome c oxidase subunit 1 (Fragment) OS=Lingulodinium polyedrum GN=COX1 PE=3 SV=1	1	37.7	15	15	492	IFFIVM[147]PIMIGGFGNWLVPLMIGAPDIAFPR
40a	tr|F6K4W5|F6K4W5_LINPO	Cytochrome c oxidase subunit 1 (Fragment) OS=Lingulodinium polyedrum GN=COX1 PE=3 SV=1	1	37.7	15	15	492	AELGQPGTLLGDDQIYNVIV
40a	tr|F6K4W5|F6K4W5_LINPO	Cytochrome c oxidase subunit 1 (Fragment) OS=Lingulodinium polyedrum GN=COX1 PE=3 SV=1	1	37.7	15	15	492	LLFGAWAGMVGTALSLLIRAELGQPGTLLGDDQIYNVIV
40b	tr|F6K4X5|F6K4X5_LINPO	Cytochrome c oxidase subunit 1 (Fragment) OS=Lingulodinium polyedrum GN=COX1 PE=3 SV=1	0		11	11	492	AELGQPGTLLGDDQ
40b	tr|F6K4X5|F6K4X5_LINPO	Cytochrome c oxidase subunit 1 (Fragment) OS=Lingulodinium polyedrum GN=COX1 PE=3 SV=1	0		11	11	492	AELGQPGTLLGDDQIYNVIV
40b	tr|F6K4X5|F6K4X5_LINPO	Cytochrome c oxidase subunit 1 (Fragment) OS=Lingulodinium polyedrum GN=COX1 PE=3 SV=1	0		11	11	492	LLFGAWAGMVGTALSLLIRAELGQPGTLLGDDQIYNVIV
41a	tr|Q2I6P1|Q2I6P1_LINPO	Pphotosystem I chain B (Fragment) OS=Lingulodinium polyedrum GN=psaB PE=2 SV=1	1	28.3	20	20	687	LKTPILCDIWDGK
41a	tr|Q2I6P1|Q2I6P1_LINPO	Pphotosystem I chain B (Fragment) OS=Lingulodinium polyedrum GN=psaB PE=2 SV=1	1	28.3	20	20	687	DYAMSSAASVHGV
41a	tr|Q2I6P1|Q2I6P1_LINPO	Pphotosystem I chain B (Fragment) OS=Lingulodinium polyedrum GN=psaB PE=2 SV=1	1	28.3	20	20	687	LKPDTSSLYISDMAHHHMALGVIFVWAGHLYQTIFK
41a	tr|Q2I6P1|Q2I6P1_LINPO	Pphotosystem I chain B (Fragment) OS=Lingulodinium polyedrum GN=psaB PE=2 SV=1	1	28.3	20	20	687	IPVVDMDMLK
41a	tr|Q2I6P1|Q2I6P1_LINPO	Pphotosystem I chain B (Fragment) OS=Lingulodinium polyedrum GN=psaB PE=2 SV=1	1	28.3	20	20	687	SLDARGSQLM[147]PDK
41b	tr|Q2I6P2|Q2I6P2_LINPO	Photosystem 1 chain B (Fragment) OS=Lingulodinium polyedrum GN=psaB PE=2 SV=1	0		8	8	234	LKTPILCDIWDGK
41b	tr|Q2I6P2|Q2I6P2_LINPO	Photosystem 1 chain B (Fragment) OS=Lingulodinium polyedrum GN=psaB PE=2 SV=1	0		8	8	234	SLDARGSQLM[147]PDK
42a	tr|Q2I6P7|Q2I6P7_LINPO	Photosystem II CP43 reaction center protein OS=Lingulodinium polyedrum GN=psbC PE=2 SV=1	1	39.8	14	14	468	DTCVTHNPYTLGR
42a	tr|Q2I6P7|Q2I6P7_LINPO	Photosystem II CP43 reaction center protein OS=Lingulodinium polyedrum GN=psbC PE=2 SV=1	1	39.8	14	14	468	DTCVTHNPYTLGR
42a	tr|Q2I6P7|Q2I6P7_LINPO	Photosystem II CP43 reaction center protein OS=Lingulodinium polyedrum GN=psbC PE=2 SV=1	1	39.8	14	14	468	RAAEFMTHAPLGSLN
42a	tr|Q2I6P7|Q2I6P7_LINPO	Photosystem II CP43 reaction center protein OS=Lingulodinium polyedrum GN=psbC PE=2 SV=1	1	39.8	14	14	468	NSFGLDIYKIQSDIQTW
42a	tr|Q2I6P7|Q2I6P7_LINPO	Photosystem II CP43 reaction center protein OS=Lingulodinium polyedrum GN=psbC PE=2 SV=1	1	39.8	14	14	468	FLGAHVAHAGLILLWSGSMTLFEVS
42a	tr|Q2I6P7|Q2I6P7_LINPO	Photosystem II CP43 reaction center protein OS=Lingulodinium polyedrum GN=psbC PE=2 SV=1	1	39.8	14	14	468	YLM[147]RSPTGEIIFGGETMRFWSMQGGWVEP
42a	tr|Q2I6P7|Q2I6P7_LINPO	Photosystem II CP43 reaction center protein OS=Lingulodinium polyedrum GN=psbC PE=2 SV=1	1	39.8	14	14	468	DQKLGVK
42b	tr|Q5DWU0|Q5DWU0_LINPO	Photosystem II CP43 protein (Fragment) OS=Lingulodinium polyedrum GN=psbC PE=2 SV=1	0.0526		13	13	360	DTCVTHNPYTLGR
42b	tr|Q5DWU0|Q5DWU0_LINPO	Photosystem II CP43 protein (Fragment) OS=Lingulodinium polyedrum GN=psbC PE=2 SV=1	0.0526		13	13	360	DTCVTHNPYTLGR
42b	tr|Q5DWU0|Q5DWU0_LINPO	Photosystem II CP43 protein (Fragment) OS=Lingulodinium polyedrum GN=psbC PE=2 SV=1	0.0526		13	13	360	NSFGLDIYKIQSDIQTW
42b	tr|Q5DWU0|Q5DWU0_LINPO	Photosystem II CP43 protein (Fragment) OS=Lingulodinium polyedrum GN=psbC PE=2 SV=1	0.0526		13	13	360	FLGAHVAHAGLILLWSGSMTLFEVS
42b	tr|Q5DWU0|Q5DWU0_LINPO	Photosystem II CP43 protein (Fragment) OS=Lingulodinium polyedrum GN=psbC PE=2 SV=1	0.0526		13	13	360	YLM[147]RSPTGEIIFGGETMRFWSMQGGWVEP
42b	tr|Q5DWU0|Q5DWU0_LINPO	Photosystem II CP43 protein (Fragment) OS=Lingulodinium polyedrum GN=psbC PE=2 SV=1	0.0526		13	13	360	DQKLGVK
43	tr|Q56VM5|Q56VM5_LINPO	Cytochrome b (Fragment) OS=Lingulodinium polyedrum PE=3 SV=1	0.9999	38.5	6	6	209	SNNPLRNSTNNK
44	tr|Q9TM70|Q9TM70_LINPO	Photosystem II protein D1 OS=Lingulodinium polyedrum GN=psbA PE=3 SV=1	0.9994	33	3	3	351	EPVAGSLLYGNNIITGA
44	tr|Q9TM70|Q9TM70_LINPO	Photosystem II protein D1 OS=Lingulodinium polyedrum GN=psbA PE=3 SV=1	0.9994	33	3	3	351	EWEFSFR
44	tr|Q9TM70|Q9TM70_LINPO	Photosystem II protein D1 OS=Lingulodinium polyedrum GN=psbA PE=3 SV=1	0.9994	33	3	3	351	LIFQYASFNNSR
44	tr|Q9TM70|Q9TM70_LINPO	Photosystem II protein D1 OS=Lingulodinium polyedrum GN=psbA PE=3 SV=1	0.9994	33	3	3	351	LINSWADIVNR
44	tr|Q9TM70|Q9TM70_LINPO	Photosystem II protein D1 OS=Lingulodinium polyedrum GN=psbA PE=3 SV=1	0.9994	33	3	3	351	NAHNFPLDLA
44	tr|Q9TM70|Q9TM70_LINPO	Photosystem II protein D1 OS=Lingulodinium polyedrum GN=psbA PE=3 SV=1	0.9994	33	3	3	351	LIFQYASFNNSR
44	tr|Q9TM70|Q9TM70_LINPO	Photosystem II protein D1 OS=Lingulodinium polyedrum GN=psbA PE=3 SV=1	0.9994	33	3	3	351	VNRADLGIEVMHER
44	tr|Q9TM70|Q9TM70_LINPO	Photosystem II protein D1 OS=Lingulodinium polyedrum GN=psbA PE=3 SV=1	0.9994	33	3	3	351	LINSWADIVNR
44	tr|Q9TM70|Q9TM70_LINPO	Photosystem II protein D1 OS=Lingulodinium polyedrum GN=psbA PE=3 SV=1	0.9994	33	3	3	351	MKNTYSIFGGSYSWWGYLVGFVLSTSNRFYIGWFGI
45	tr|O96365|O96365_LINPO	Glyceraldehyde-3-phosphate dehydrogenase (Fragment) OS=Lingulodinium polyedrum GN=GAPDH PE=2 SV=1	0.9662	66.6	2	2	426	AASGNIIPSSTGAAK
45	tr|O96365|O96365_LINPO	Glyceraldehyde-3-phosphate dehydrogenase (Fragment) OS=Lingulodinium polyedrum GN=GAPDH PE=2 SV=1	0.9662	66.6	2	2	426	AGIMLDPTFVK
45	tr|O96365|O96365_LINPO	Glyceraldehyde-3-phosphate dehydrogenase (Fragment) OS=Lingulodinium polyedrum GN=GAPDH PE=2 SV=1	0.9662	66.6	2	2	426	AGIM[147]LDPTFVK
45	tr|O96365|O96365_LINPO	Glyceraldehyde-3-phosphate dehydrogenase (Fragment) OS=Lingulodinium polyedrum GN=GAPDH PE=2 SV=1	0.9662	66.6	2	2	426	IAMKDPEVELK
45	tr|O96365|O96365_LINPO	Glyceraldehyde-3-phosphate dehydrogenase (Fragment) OS=Lingulodinium polyedrum GN=GAPDH PE=2 SV=1	0.9662	66.6	2	2	426	IAM[147]KDPEVELK
45	tr|O96365|O96365_LINPO	Glyceraldehyde-3-phosphate dehydrogenase (Fragment) OS=Lingulodinium polyedrum GN=GAPDH PE=2 SV=1	0.9662	66.6	2	2	426	LINASYDADYLAYM[147]M[147]K
45	tr|O96365|O96365_LINPO	Glyceraldehyde-3-phosphate dehydrogenase (Fragment) OS=Lingulodinium polyedrum GN=GAPDH PE=2 SV=1	0.9662	66.6	2	2	426	EVDGDALVIDGLK
45	tr|O96365|O96365_LINPO	Glyceraldehyde-3-phosphate dehydrogenase (Fragment) OS=Lingulodinium polyedrum GN=GAPDH PE=2 SV=1	0.9662	66.6	2	2	426	GLMTTIHAMTASQPTVDSASK
45	tr|O96365|O96365_LINPO	Glyceraldehyde-3-phosphate dehydrogenase (Fragment) OS=Lingulodinium polyedrum GN=GAPDH PE=2 SV=1	0.9662	66.6	2	2	426	GLMTTIHAM[147]TASQPTVDSASK
45	tr|O96365|O96365_LINPO	Glyceraldehyde-3-phosphate dehydrogenase (Fragment) OS=Lingulodinium polyedrum GN=GAPDH PE=2 SV=1	0.9662	66.6	2	2	426	GLM[147]TTIHAM[147]TASQPTVDSASK
45	tr|O96365|O96365_LINPO	Glyceraldehyde-3-phosphate dehydrogenase (Fragment) OS=Lingulodinium polyedrum GN=GAPDH PE=2 SV=1	0.9662	66.6	2	2	426	ALSMGRQSSSVAMR
45	tr|O96365|O96365_LINPO	Glyceraldehyde-3-phosphate dehydrogenase (Fragment) OS=Lingulodinium polyedrum GN=GAPDH PE=2 SV=1	0.9662	66.6	2	2	426	RGLM[147]TTIHAM[147]TASQPTVDSAS
45	tr|O96365|O96365_LINPO	Glyceraldehyde-3-phosphate dehydrogenase (Fragment) OS=Lingulodinium polyedrum GN=GAPDH PE=2 SV=1	0.9662	66.6	2	2	426	IAM[147]KDPEVELK
45	tr|O96365|O96365_LINPO	Glyceraldehyde-3-phosphate dehydrogenase (Fragment) OS=Lingulodinium polyedrum GN=GAPDH PE=2 SV=1	0.9662	66.6	2	2	426	IAMKDPEVELK
45	tr|O96365|O96365_LINPO	Glyceraldehyde-3-phosphate dehydrogenase (Fragment) OS=Lingulodinium polyedrum GN=GAPDH PE=2 SV=1	0.9662	66.6	2	2	426	YLAYM[147]MKYDTIHGK
45	tr|O96365|O96365_LINPO	Glyceraldehyde-3-phosphate dehydrogenase (Fragment) OS=Lingulodinium polyedrum GN=GAPDH PE=2 SV=1	0.9662	66.6	2	2	426	LTGM[147]AFRVPTIDVSVV
45	tr|O96365|O96365_LINPO	Glyceraldehyde-3-phosphate dehydrogenase (Fragment) OS=Lingulodinium polyedrum GN=GAPDH PE=2 SV=1	0.9662	66.6	2	2	426	IVFSAPAKDDSHTIVMGVNQDT
45	tr|O96365|O96365_LINPO	Glyceraldehyde-3-phosphate dehydrogenase (Fragment) OS=Lingulodinium polyedrum GN=GAPDH PE=2 SV=1	0.9662	66.6	2	2	426	MTTIHAM[147]TASQPTVDSASKK
45	tr|O96365|O96365_LINPO	Glyceraldehyde-3-phosphate dehydrogenase (Fragment) OS=Lingulodinium polyedrum GN=GAPDH PE=2 SV=1	0.9662	66.6	2	2	426	IVFSAPAKDDSHTIVMGVN

## Sheet: MS results 2
entry no.	protein	description	protein probability	percent coverage	number unique peptides	total independent spectra	protein length	peptide sequence
1	LpHV1	HV1 proton channel of Lingulodinium polyedrum	1	59.6	25	35	333	LMVLDGFV
1	LpHV1	HV1 proton channel of Lingulodinium polyedrum	1	59.6	25	35	333	QRQAARE
1	LpHV1	HV1 proton channel of Lingulodinium polyedrum	1	59.6	25	35	333	ALAAERQ
1	LpHV1	HV1 proton channel of Lingulodinium polyedrum	1	59.6	25	35	333	EKLEMDVAK
1	LpHV1	HV1 proton channel of Lingulodinium polyedrum	1	59.6	25	35	333	VHPVLGTF
1	LpHV1	HV1 proton channel of Lingulodinium polyedrum	1	59.6	25	35	333	MAGHHGA
1	LpHV1	HV1 proton channel of Lingulodinium polyedrum	1	59.6	25	35	333	AYVDACPHGHGRR
1	LpHV1	HV1 proton channel of Lingulodinium polyedrum	1	59.6	25	35	333	SLHDAEK
1	LpHV1	HV1 proton channel of Lingulodinium polyedrum	1	59.6	25	35	333	QRQAAREQ
1	LpHV1	HV1 proton channel of Lingulodinium polyedrum	1	59.6	25	35	333	IAAQIAQA
1	LpHV1	HV1 proton channel of Lingulodinium polyedrum	1	59.6	25	35	333	LSEQVWAHM[147]SGEK
2	sp|Q42813|RBL2_LINPO	Ribulose 1,5-bisphosphate carboxylase, chloroplastic (Fragment) OS=Lingulodinium polyedrum GN=rbcL PE=1 SV=2	1	77.3	43	65	557	GAFLTFQ
2	sp|Q42813|RBL2_LINPO	Ribulose 1,5-bisphosphate carboxylase, chloroplastic (Fragment) OS=Lingulodinium polyedrum GN=rbcL PE=1 SV=2	1	77.3	43	65	557	VHTKISR
2	sp|Q42813|RBL2_LINPO	Ribulose 1,5-bisphosphate carboxylase, chloroplastic (Fragment) OS=Lingulodinium polyedrum GN=rbcL PE=1 SV=2	1	77.3	43	65	557	AGTYGDVSLSDGVIEYAK
2	sp|Q42813|RBL2_LINPO	Ribulose 1,5-bisphosphate carboxylase, chloroplastic (Fragment) OS=Lingulodinium polyedrum GN=rbcL PE=1 SV=2	1	77.3	43	65	557	TVDALVYYIDPENEEM[147]K
2	sp|Q42813|RBL2_LINPO	Ribulose 1,5-bisphosphate carboxylase, chloroplastic (Fragment) OS=Lingulodinium polyedrum GN=rbcL PE=1 SV=2	1	77.3	43	65	557	IAYPVPLFDR
2	sp|Q42813|RBL2_LINPO	Ribulose 1,5-bisphosphate carboxylase, chloroplastic (Fragment) OS=Lingulodinium polyedrum GN=rbcL PE=1 SV=2	1	77.3	43	65	557	DM[147]TDGGLVVGTIIKPK
2	sp|Q42813|RBL2_LINPO	Ribulose 1,5-bisphosphate carboxylase, chloroplastic (Fragment) OS=Lingulodinium polyedrum GN=rbcL PE=1 SV=2	1	77.3	43	65	557	IYDIYFPPSYLR
2	sp|Q42813|RBL2_LINPO	Ribulose 1,5-bisphosphate carboxylase, chloroplastic (Fragment) OS=Lingulodinium polyedrum GN=rbcL PE=1 SV=2	1	77.3	43	65	557	GAFLTFQK
2	sp|Q42813|RBL2_LINPO	Ribulose 1,5-bisphosphate carboxylase, chloroplastic (Fragment) OS=Lingulodinium polyedrum GN=rbcL PE=1 SV=2	1	77.3	43	65	557	DMTDGGLVVGTIIKPK
2	sp|Q42813|RBL2_LINPO	Ribulose 1,5-bisphosphate carboxylase, chloroplastic (Fragment) OS=Lingulodinium polyedrum GN=rbcL PE=1 SV=2	1	77.3	43	65	557	PAEM[147]IAR
2	sp|Q42813|RBL2_LINPO	Ribulose 1,5-bisphosphate carboxylase, chloroplastic (Fragment) OS=Lingulodinium polyedrum GN=rbcL PE=1 SV=2	1	77.3	43	65	557	DQIYPGWK
2	sp|Q42813|RBL2_LINPO	Ribulose 1,5-bisphosphate carboxylase, chloroplastic (Fragment) OS=Lingulodinium polyedrum GN=rbcL PE=1 SV=2	1	77.3	43	65	557	WEGVVQTTP
2	sp|Q42813|RBL2_LINPO	Ribulose 1,5-bisphosphate carboxylase, chloroplastic (Fragment) OS=Lingulodinium polyedrum GN=rbcL PE=1 SV=2	1	77.3	43	65	557	AGGPYYHQK
2	sp|Q42813|RBL2_LINPO	Ribulose 1,5-bisphosphate carboxylase, chloroplastic (Fragment) OS=Lingulodinium polyedrum GN=rbcL PE=1 SV=2	1	77.3	43	65	557	GIAYM[147]LQ
2	sp|Q42813|RBL2_LINPO	Ribulose 1,5-bisphosphate carboxylase, chloroplastic (Fragment) OS=Lingulodinium polyedrum GN=rbcL PE=1 SV=2	1	77.3	43	65	557	WEGVVQT
2	sp|Q42813|RBL2_LINPO	Ribulose 1,5-bisphosphate carboxylase, chloroplastic (Fragment) OS=Lingulodinium polyedrum GN=rbcL PE=1 SV=2	1	77.3	43	65	557	TGRSTVVR
2	sp|Q42813|RBL2_LINPO	Ribulose 1,5-bisphosphate carboxylase, chloroplastic (Fragment) OS=Lingulodinium polyedrum GN=rbcL PE=1 SV=2	1	77.3	43	65	557	KMVGDASDK
2	sp|Q42813|RBL2_LINPO	Ribulose 1,5-bisphosphate carboxylase, chloroplastic (Fragment) OS=Lingulodinium polyedrum GN=rbcL PE=1 SV=2	1	77.3	43	65	557	VTAMKACIK
2	sp|Q42813|RBL2_LINPO	Ribulose 1,5-bisphosphate carboxylase, chloroplastic (Fragment) OS=Lingulodinium polyedrum GN=rbcL PE=1 SV=2	1	77.3	43	65	557	NITDGRA
2	sp|Q42813|RBL2_LINPO	Ribulose 1,5-bisphosphate carboxylase, chloroplastic (Fragment) OS=Lingulodinium polyedrum GN=rbcL PE=1 SV=2	1	77.3	43	65	557	VQAASFDWQK
2	sp|Q42813|RBL2_LINPO	Ribulose 1,5-bisphosphate carboxylase, chloroplastic (Fragment) OS=Lingulodinium polyedrum GN=rbcL PE=1 SV=2	1	77.3	43	65	557	VIGASGIHVGTM[147]SFGK
2	sp|Q42813|RBL2_LINPO	Ribulose 1,5-bisphosphate carboxylase, chloroplastic (Fragment) OS=Lingulodinium polyedrum GN=rbcL PE=1 SV=2	1	77.3	43	65	557	GTIIKPK
2	sp|Q42813|RBL2_LINPO	Ribulose 1,5-bisphosphate carboxylase, chloroplastic (Fragment) OS=Lingulodinium polyedrum GN=rbcL PE=1 SV=2	1	77.3	43	65	557	KAAAAAFV
3	tr|A3QSS0|A3QSS0_LINPO	Chloroplast sedoheptulose-1,7-bisphosphatase OS=Lingulodinium polyedrum GN=SBP PE=2 SV=1	1	60.6	31	56	434	AARPAAVR
3	tr|A3QSS0|A3QSS0_LINPO	Chloroplast sedoheptulose-1,7-bisphosphatase OS=Lingulodinium polyedrum GN=SBP PE=2 SV=1	1	60.6	31	56	434	FNETVLQ
3	tr|A3QSS0|A3QSS0_LINPO	Chloroplast sedoheptulose-1,7-bisphosphatase OS=Lingulodinium polyedrum GN=SBP PE=2 SV=1	1	60.6	31	56	434	NQWICSR
3	tr|A3QSS0|A3QSS0_LINPO	Chloroplast sedoheptulose-1,7-bisphosphatase OS=Lingulodinium polyedrum GN=SBP PE=2 SV=1	1	60.6	31	56	434	STGLLGATGR
3	tr|A3QSS0|A3QSS0_LINPO	Chloroplast sedoheptulose-1,7-bisphosphatase OS=Lingulodinium polyedrum GN=SBP PE=2 SV=1	1	60.6	31	56	434	VGLAAAR
3	tr|A3QSS0|A3QSS0_LINPO	Chloroplast sedoheptulose-1,7-bisphosphatase OS=Lingulodinium polyedrum GN=SBP PE=2 SV=1	1	60.6	31	56	434	AAQEVDGYAK
3	tr|A3QSS0|A3QSS0_LINPO	Chloroplast sedoheptulose-1,7-bisphosphatase OS=Lingulodinium polyedrum GN=SBP PE=2 SV=1	1	60.6	31	56	434	DQVMSLVALYGPR
3	tr|A3QSS0|A3QSS0_LINPO	Chloroplast sedoheptulose-1,7-bisphosphatase OS=Lingulodinium polyedrum GN=SBP PE=2 SV=1	1	60.6	31	56	434	DQVM[147]SLVALYGPR
3	tr|A3QSS0|A3QSS0_LINPO	Chloroplast sedoheptulose-1,7-bisphosphatase OS=Lingulodinium polyedrum GN=SBP PE=2 SV=1	1	60.6	31	56	434	LVCEASSEEEPEIVK
3	tr|A3QSS0|A3QSS0_LINPO	Chloroplast sedoheptulose-1,7-bisphosphatase OS=Lingulodinium polyedrum GN=SBP PE=2 SV=1	1	60.6	31	56	434	SSQLVCEASSEEEPEIVK
3	tr|A3QSS0|A3QSS0_LINPO	Chloroplast sedoheptulose-1,7-bisphosphatase OS=Lingulodinium polyedrum GN=SBP PE=2 SV=1	1	60.6	31	56	434	YSGGLVPDVCQQFTK
3	tr|A3QSS0|A3QSS0_LINPO	Chloroplast sedoheptulose-1,7-bisphosphatase OS=Lingulodinium polyedrum GN=SBP PE=2 SV=1	1	60.6	31	56	434	TALAIGSANEVDRFNETVLQK
3	tr|A3QSS0|A3QSS0_LINPO	Chloroplast sedoheptulose-1,7-bisphosphatase OS=Lingulodinium polyedrum GN=SBP PE=2 SV=1	1	60.6	31	56	434	TQGVFTNPTSK
3	tr|A3QSS0|A3QSS0_LINPO	Chloroplast sedoheptulose-1,7-bisphosphatase OS=Lingulodinium polyedrum GN=SBP PE=2 SV=1	1	60.6	31	56	434	TSDGVSGQSVLDVK
3	tr|A3QSS0|A3QSS0_LINPO	Chloroplast sedoheptulose-1,7-bisphosphatase OS=Lingulodinium polyedrum GN=SBP PE=2 SV=1	1	60.6	31	56	434	DQVM[147]SLVALYGPR
3	tr|A3QSS0|A3QSS0_LINPO	Chloroplast sedoheptulose-1,7-bisphosphatase OS=Lingulodinium polyedrum GN=SBP PE=2 SV=1	1	60.6	31	56	434	ELLAACVK
3	tr|A3QSS0|A3QSS0_LINPO	Chloroplast sedoheptulose-1,7-bisphosphatase OS=Lingulodinium polyedrum GN=SBP PE=2 SV=1	1	60.6	31	56	434	DKYDSIEEVM[147]EK
3	tr|A3QSS0|A3QSS0_LINPO	Chloroplast sedoheptulose-1,7-bisphosphatase OS=Lingulodinium polyedrum GN=SBP PE=2 SV=1	1	60.6	31	56	434	IFAPANM[147]R
3	tr|A3QSS0|A3QSS0_LINPO	Chloroplast sedoheptulose-1,7-bisphosphatase OS=Lingulodinium polyedrum GN=SBP PE=2 SV=1	1	60.6	31	56	434	LIDHYM[147]TNR
3	tr|A3QSS0|A3QSS0_LINPO	Chloroplast sedoheptulose-1,7-bisphosphatase OS=Lingulodinium polyedrum GN=SBP PE=2 SV=1	1	60.6	31	56	434	LAFEAAPFGR
3	tr|A3QSS0|A3QSS0_LINPO	Chloroplast sedoheptulose-1,7-bisphosphatase OS=Lingulodinium polyedrum GN=SBP PE=2 SV=1	1	60.6	31	56	434	IEAVDQR
3	tr|A3QSS0|A3QSS0_LINPO	Chloroplast sedoheptulose-1,7-bisphosphatase OS=Lingulodinium polyedrum GN=SBP PE=2 SV=1	1	60.6	31	56	434	IFAPANMR
3	tr|A3QSS0|A3QSS0_LINPO	Chloroplast sedoheptulose-1,7-bisphosphatase OS=Lingulodinium polyedrum GN=SBP PE=2 SV=1	1	60.6	31	56	434	AGSGGAPASA
3	tr|A3QSS0|A3QSS0_LINPO	Chloroplast sedoheptulose-1,7-bisphosphatase OS=Lingulodinium polyedrum GN=SBP PE=2 SV=1	1	60.6	31	56	434	LLGATGR
3	tr|A3QSS0|A3QSS0_LINPO	Chloroplast sedoheptulose-1,7-bisphosphatase OS=Lingulodinium polyedrum GN=SBP PE=2 SV=1	1	60.6	31	56	434	NETVLQK
3	tr|A3QSS0|A3QSS0_LINPO	Chloroplast sedoheptulose-1,7-bisphosphatase OS=Lingulodinium polyedrum GN=SBP PE=2 SV=1	1	60.6	31	56	434	LVEM[147]AGGKT
4	tr|A3QSS6|A3QSS6_LINPO	Chloroplast fructose-1,6-bisphosphatase (Fragment) OS=Lingulodinium polyedrum GN=FBP PE=2 SV=1	1	71.7	34	57	356	LGSFETR
4	tr|A3QSS6|A3QSS6_LINPO	Chloroplast fructose-1,6-bisphosphatase (Fragment) OS=Lingulodinium polyedrum GN=FBP PE=2 SV=1	1	71.7	34	57	356	LGTLASEEEDSPVLGSFETR
4	tr|A3QSS6|A3QSS6_LINPO	Chloroplast fructose-1,6-bisphosphatase (Fragment) OS=Lingulodinium polyedrum GN=FBP PE=2 SV=1	1	71.7	34	57	356	LLYEAAPMSFILEQAGGK
4	tr|A3QSS6|A3QSS6_LINPO	Chloroplast fructose-1,6-bisphosphatase (Fragment) OS=Lingulodinium polyedrum GN=FBP PE=2 SV=1	1	71.7	34	57	356	LLYEAAPM[147]SFILEQAGGK
4	tr|A3QSS6|A3QSS6_LINPO	Chloroplast fructose-1,6-bisphosphatase (Fragment) OS=Lingulodinium polyedrum GN=FBP PE=2 SV=1	1	71.7	34	57	356	TLLYGGIFAYPADSK
4	tr|A3QSS6|A3QSS6_LINPO	Chloroplast fructose-1,6-bisphosphatase (Fragment) OS=Lingulodinium polyedrum GN=FBP PE=2 SV=1	1	71.7	34	57	356	YEAAPM[147]SFILEQAGGK
4	tr|A3QSS6|A3QSS6_LINPO	Chloroplast fructose-1,6-bisphosphatase (Fragment) OS=Lingulodinium polyedrum GN=FBP PE=2 SV=1	1	71.7	34	57	356	LLYEAAPM[147]SFILEQAGGK
4	tr|A3QSS6|A3QSS6_LINPO	Chloroplast fructose-1,6-bisphosphatase (Fragment) OS=Lingulodinium polyedrum GN=FBP PE=2 SV=1	1	71.7	34	57	356	VPVILGSKDDVEECQK
4	tr|A3QSS6|A3QSS6_LINPO	Chloroplast fructose-1,6-bisphosphatase (Fragment) OS=Lingulodinium polyedrum GN=FBP PE=2 SV=1	1	71.7	34	57	356	YVEDIQTGKGETGTQYSLR
4	tr|A3QSS6|A3QSS6_LINPO	Chloroplast fructose-1,6-bisphosphatase (Fragment) OS=Lingulodinium polyedrum GN=FBP PE=2 SV=1	1	71.7	34	57	356	IYSM[147]NEANVEEWDEPM[147]KR
4	tr|A3QSS6|A3QSS6_LINPO	Chloroplast fructose-1,6-bisphosphatase (Fragment) OS=Lingulodinium polyedrum GN=FBP PE=2 SV=1	1	71.7	34	57	356	GDDGQVISR
4	tr|A3QSS6|A3QSS6_LINPO	Chloroplast fructose-1,6-bisphosphatase (Fragment) OS=Lingulodinium polyedrum GN=FBP PE=2 SV=1	1	71.7	34	57	356	ITNDVLKK
4	tr|A3QSS6|A3QSS6_LINPO	Chloroplast fructose-1,6-bisphosphatase (Fragment) OS=Lingulodinium polyedrum GN=FBP PE=2 SV=1	1	71.7	34	57	356	GDDGQVI
4	tr|A3QSS6|A3QSS6_LINPO	Chloroplast fructose-1,6-bisphosphatase (Fragment) OS=Lingulodinium polyedrum GN=FBP PE=2 SV=1	1	71.7	34	57	356	YEAAPMSFILEQAGGK
4	tr|A3QSS6|A3QSS6_LINPO	Chloroplast fructose-1,6-bisphosphatase (Fragment) OS=Lingulodinium polyedrum GN=FBP PE=2 SV=1	1	71.7	34	57	356	TNDVLKK
4	tr|A3QSS6|A3QSS6_LINPO	Chloroplast fructose-1,6-bisphosphatase (Fragment) OS=Lingulodinium polyedrum GN=FBP PE=2 SV=1	1	71.7	34	57	356	DSKNKDGK
4	tr|A3QSS6|A3QSS6_LINPO	Chloroplast fructose-1,6-bisphosphatase (Fragment) OS=Lingulodinium polyedrum GN=FBP PE=2 SV=1	1	71.7	34	57	356	QAPLSQA
4	tr|A3QSS6|A3QSS6_LINPO	Chloroplast fructose-1,6-bisphosphatase (Fragment) OS=Lingulodinium polyedrum GN=FBP PE=2 SV=1	1	71.7	34	57	356	NKDGKLR
5	tr|A5H0L6|A5H0L6_LINPO	AAA (Fragment) OS=Lingulodinium polyedrum PE=2 SV=1	1	45.6	21	26	667	CHVVLEA
5	tr|A5H0L6|A5H0L6_LINPO	AAA (Fragment) OS=Lingulodinium polyedrum PE=2 SV=1	1	45.6	21	26	667	RLLVDSAEQ
5	tr|A5H0L6|A5H0L6_LINPO	AAA (Fragment) OS=Lingulodinium polyedrum PE=2 SV=1	1	45.6	21	26	667	ASQGQAR
5	tr|A5H0L6|A5H0L6_LINPO	AAA (Fragment) OS=Lingulodinium polyedrum PE=2 SV=1	1	45.6	21	26	667	PVGTTLNR
5	tr|A5H0L6|A5H0L6_LINPO	AAA (Fragment) OS=Lingulodinium polyedrum PE=2 SV=1	1	45.6	21	26	667	TAAVELLR
5	tr|A5H0L6|A5H0L6_LINPO	AAA (Fragment) OS=Lingulodinium polyedrum PE=2 SV=1	1	45.6	21	26	667	VLAGRRR
6	tr|A5XB30|A5XB30_LINPO	Glucose-6-phosphate isomerase OS=Lingulodinium polyedrum GN=GPI PE=2 SV=1	1	54.3	30	39	557	PEKLVPHK
6	tr|A5XB30|A5XB30_LINPO	Glucose-6-phosphate isomerase OS=Lingulodinium polyedrum GN=GPI PE=2 SV=1	1	54.3	30	39	557	LFSLAEK
6	tr|A5XB30|A5XB30_LINPO	Glucose-6-phosphate isomerase OS=Lingulodinium polyedrum GN=GPI PE=2 SV=1	1	54.3	30	39	557	AAEGRRLR
6	tr|A5XB30|A5XB30_LINPO	Glucose-6-phosphate isomerase OS=Lingulodinium polyedrum GN=GPI PE=2 SV=1	1	54.3	30	39	557	AFGIDPA
6	tr|A5XB30|A5XB30_LINPO	Glucose-6-phosphate isomerase OS=Lingulodinium polyedrum GN=GPI PE=2 SV=1	1	54.3	30	39	557	ALDGLSAETT
6	tr|A5XB30|A5XB30_LINPO	Glucose-6-phosphate isomerase OS=Lingulodinium polyedrum GN=GPI PE=2 SV=1	1	54.3	30	39	557	MKATHLR
6	tr|A5XB30|A5XB30_LINPO	Glucose-6-phosphate isomerase OS=Lingulodinium polyedrum GN=GPI PE=2 SV=1	1	54.3	30	39	557	DPIDVKR
6	tr|A5XB30|A5XB30_LINPO	Glucose-6-phosphate isomerase OS=Lingulodinium polyedrum GN=GPI PE=2 SV=1	1	54.3	30	39	557	KTVKEWLIK
6	tr|A5XB30|A5XB30_LINPO	Glucose-6-phosphate isomerase OS=Lingulodinium polyedrum GN=GPI PE=2 SV=1	1	54.3	30	39	557	AAASKM[147]K
6	tr|A5XB30|A5XB30_LINPO	Glucose-6-phosphate isomerase OS=Lingulodinium polyedrum GN=GPI PE=2 SV=1	1	54.3	30	39	557	MLLKKYLE
6	tr|A5XB30|A5XB30_LINPO	Glucose-6-phosphate isomerase OS=Lingulodinium polyedrum GN=GPI PE=2 SV=1	1	54.3	30	39	557	AETM[147]LNAK
6	tr|A5XB30|A5XB30_LINPO	Glucose-6-phosphate isomerase OS=Lingulodinium polyedrum GN=GPI PE=2 SV=1	1	54.3	30	39	557	TKAFGIDPAN
7	tr|A7UC72|A7UC72_LINPO	Delta carbonic anhydrase 1 (Fragment) OS=Lingulodinium polyedrum GN=ca1 PE=2 SV=1	1	46.2	23	36	291	YTGSTTGTSR
7	tr|A7UC72|A7UC72_LINPO	Delta carbonic anhydrase 1 (Fragment) OS=Lingulodinium polyedrum GN=ca1 PE=2 SV=1	1	46.2	23	36	291	YTPITWQVDRK
7	tr|A7UC72|A7UC72_LINPO	Delta carbonic anhydrase 1 (Fragment) OS=Lingulodinium polyedrum GN=ca1 PE=2 SV=1	1	46.2	23	36	291	GWIVDSAK
7	tr|A7UC72|A7UC72_LINPO	Delta carbonic anhydrase 1 (Fragment) OS=Lingulodinium polyedrum GN=ca1 PE=2 SV=1	1	46.2	23	36	291	QYGQDIA
7	tr|A7UC72|A7UC72_LINPO	Delta carbonic anhydrase 1 (Fragment) OS=Lingulodinium polyedrum GN=ca1 PE=2 SV=1	1	46.2	23	36	291	YTGSTTGTSR
7	tr|A7UC72|A7UC72_LINPO	Delta carbonic anhydrase 1 (Fragment) OS=Lingulodinium polyedrum GN=ca1 PE=2 SV=1	1	46.2	23	36	291	YTPITWQVDR
7	tr|A7UC72|A7UC72_LINPO	Delta carbonic anhydrase 1 (Fragment) OS=Lingulodinium polyedrum GN=ca1 PE=2 SV=1	1	46.2	23	36	291	GSTTGTSR
7	tr|A7UC72|A7UC72_LINPO	Delta carbonic anhydrase 1 (Fragment) OS=Lingulodinium polyedrum GN=ca1 PE=2 SV=1	1	46.2	23	36	291	LAANNLVR
7	tr|A7UC72|A7UC72_LINPO	Delta carbonic anhydrase 1 (Fragment) OS=Lingulodinium polyedrum GN=ca1 PE=2 SV=1	1	46.2	23	36	291	AANNLVR
7	tr|A7UC72|A7UC72_LINPO	Delta carbonic anhydrase 1 (Fragment) OS=Lingulodinium polyedrum GN=ca1 PE=2 SV=1	1	46.2	23	36	291	AGANVTR
7	tr|A7UC72|A7UC72_LINPO	Delta carbonic anhydrase 1 (Fragment) OS=Lingulodinium polyedrum GN=ca1 PE=2 SV=1	1	46.2	23	36	291	YDASDAKFT
7	tr|A7UC72|A7UC72_LINPO	Delta carbonic anhydrase 1 (Fragment) OS=Lingulodinium polyedrum GN=ca1 PE=2 SV=1	1	46.2	23	36	291	TGSTTGTSR
7	tr|A7UC72|A7UC72_LINPO	Delta carbonic anhydrase 1 (Fragment) OS=Lingulodinium polyedrum GN=ca1 PE=2 SV=1	1	46.2	23	36	291	PITWQVDRK
8	tr|A7UC73|A7UC73_LINPO	Delta carbonic anhydrase 2 OS=Lingulodinium polyedrum GN=ca2 PE=2 SV=1	1	48.7	33	58	445	DNEVCSR
8	tr|A7UC73|A7UC73_LINPO	Delta carbonic anhydrase 2 OS=Lingulodinium polyedrum GN=ca2 PE=2 SV=1	1	48.7	33	58	445	GAVKDM[147]YK
8	tr|A7UC73|A7UC73_LINPO	Delta carbonic anhydrase 2 OS=Lingulodinium polyedrum GN=ca2 PE=2 SV=1	1	48.7	33	58	445	YTGSTTGTSR
8	tr|A7UC73|A7UC73_LINPO	Delta carbonic anhydrase 2 OS=Lingulodinium polyedrum GN=ca2 PE=2 SV=1	1	48.7	33	58	445	AAAAGTSGPSTCGAVK
8	tr|A7UC73|A7UC73_LINPO	Delta carbonic anhydrase 2 OS=Lingulodinium polyedrum GN=ca2 PE=2 SV=1	1	48.7	33	58	445	GMIVDGHYGQDIAK
8	tr|A7UC73|A7UC73_LINPO	Delta carbonic anhydrase 2 OS=Lingulodinium polyedrum GN=ca2 PE=2 SV=1	1	48.7	33	58	445	YTGSTTGTSRDNEVCSR
8	tr|A7UC73|A7UC73_LINPO	Delta carbonic anhydrase 2 OS=Lingulodinium polyedrum GN=ca2 PE=2 SV=1	1	48.7	33	58	445	GM[147]IVDGHYGQDIAK
8	tr|A7UC73|A7UC73_LINPO	Delta carbonic anhydrase 2 OS=Lingulodinium polyedrum GN=ca2 PE=2 SV=1	1	48.7	33	58	445	YTPITWQVDRK
8	tr|A7UC73|A7UC73_LINPO	Delta carbonic anhydrase 2 OS=Lingulodinium polyedrum GN=ca2 PE=2 SV=1	1	48.7	33	58	445	YTGSTTGTSR
8	tr|A7UC73|A7UC73_LINPO	Delta carbonic anhydrase 2 OS=Lingulodinium polyedrum GN=ca2 PE=2 SV=1	1	48.7	33	58	445	YTPITWQVDR
8	tr|A7UC73|A7UC73_LINPO	Delta carbonic anhydrase 2 OS=Lingulodinium polyedrum GN=ca2 PE=2 SV=1	1	48.7	33	58	445	YTGSTTGTSRDNEVCSR
8	tr|A7UC73|A7UC73_LINPO	Delta carbonic anhydrase 2 OS=Lingulodinium polyedrum GN=ca2 PE=2 SV=1	1	48.7	33	58	445	GMIVDGHYGQDIAK
8	tr|A7UC73|A7UC73_LINPO	Delta carbonic anhydrase 2 OS=Lingulodinium polyedrum GN=ca2 PE=2 SV=1	1	48.7	33	58	445	GSTTGTSR
8	tr|A7UC73|A7UC73_LINPO	Delta carbonic anhydrase 2 OS=Lingulodinium polyedrum GN=ca2 PE=2 SV=1	1	48.7	33	58	445	RLDASSR
8	tr|A7UC73|A7UC73_LINPO	Delta carbonic anhydrase 2 OS=Lingulodinium polyedrum GN=ca2 PE=2 SV=1	1	48.7	33	58	445	DNEVCSR
8	tr|A7UC73|A7UC73_LINPO	Delta carbonic anhydrase 2 OS=Lingulodinium polyedrum GN=ca2 PE=2 SV=1	1	48.7	33	58	445	GHYGQDIAK
8	tr|A7UC73|A7UC73_LINPO	Delta carbonic anhydrase 2 OS=Lingulodinium polyedrum GN=ca2 PE=2 SV=1	1	48.7	33	58	445	TGSTTGTSR
8	tr|A7UC73|A7UC73_LINPO	Delta carbonic anhydrase 2 OS=Lingulodinium polyedrum GN=ca2 PE=2 SV=1	1	48.7	33	58	445	PITWQVDRK
8	tr|A7UC73|A7UC73_LINPO	Delta carbonic anhydrase 2 OS=Lingulodinium polyedrum GN=ca2 PE=2 SV=1	1	48.7	33	58	445	NGAMRTR
9	tr|D8UXL7|D8UXL7_LINPO	Cellulase OS=Lingulodinium polyedrum PE=2 SV=1	1	46.2	17	19	482	KMGEALDRG
9	tr|D8UXL7|D8UXL7_LINPO	Cellulase OS=Lingulodinium polyedrum PE=2 SV=1	1	46.2	17	19	482	LLCLLGVAVAQ
9	tr|D8UXL7|D8UXL7_LINPO	Cellulase OS=Lingulodinium polyedrum PE=2 SV=1	1	46.2	17	19	482	HGNNRAGAK
9	tr|D8UXL7|D8UXL7_LINPO	Cellulase OS=Lingulodinium polyedrum PE=2 SV=1	1	46.2	17	19	482	NEVERGPR
9	tr|D8UXL7|D8UXL7_LINPO	Cellulase OS=Lingulodinium polyedrum PE=2 SV=1	1	46.2	17	19	482	ESSYGIK
9	tr|D8UXL7|D8UXL7_LINPO	Cellulase OS=Lingulodinium polyedrum PE=2 SV=1	1	46.2	17	19	482	ERYQDASV
9	tr|D8UXL7|D8UXL7_LINPO	Cellulase OS=Lingulodinium polyedrum PE=2 SV=1	1	46.2	17	19	482	KM[147]GEALDR
9	tr|D8UXL7|D8UXL7_LINPO	Cellulase OS=Lingulodinium polyedrum PE=2 SV=1	1	46.2	17	19	482	ETPGVVRG
9	tr|D8UXL7|D8UXL7_LINPO	Cellulase OS=Lingulodinium polyedrum PE=2 SV=1	1	46.2	17	19	482	RGPRM[147]PLK
10	tr|E6Y2P0|E6Y2P0_LINPO	Putative mitochondrial ADP/ATP translocase OS=Lingulodinium polyedrum PE=2 SV=1	1	67.4	27	38	310	TVVAPIER
10	tr|E6Y2P0|E6Y2P0_LINPO	Putative mitochondrial ADP/ATP translocase OS=Lingulodinium polyedrum PE=2 SV=1	1	67.4	27	38	310	YFPTQALNFAFK
10	tr|E6Y2P0|E6Y2P0_LINPO	Putative mitochondrial ADP/ATP translocase OS=Lingulodinium polyedrum PE=2 SV=1	1	67.4	27	38	310	LAADVGKAG
10	tr|E6Y2P0|E6Y2P0_LINPO	Putative mitochondrial ADP/ATP translocase OS=Lingulodinium polyedrum PE=2 SV=1	1	67.4	27	38	310	GAGSNVIRGTG
10	tr|E6Y2P0|E6Y2P0_LINPO	Putative mitochondrial ADP/ATP translocase OS=Lingulodinium polyedrum PE=2 SV=1	1	67.4	27	38	310	AGDKNARE
10	tr|E6Y2P0|E6Y2P0_LINPO	Putative mitochondrial ADP/ATP translocase OS=Lingulodinium polyedrum PE=2 SV=1	1	67.4	27	38	310	FFAGNLASGG
10	tr|E6Y2P0|E6Y2P0_LINPO	Putative mitochondrial ADP/ATP translocase OS=Lingulodinium polyedrum PE=2 SV=1	1	67.4	27	38	310	AGSNVIR
11	tr|O00941|O00941_LINPO	Peridinin-chlorophyll a-binding protein PCP OS=Lingulodinium polyedrum PE=4 SV=1	1	93.3	78	157	382	ADGNLLK
11	tr|O00941|O00941_LINPO	Peridinin-chlorophyll a-binding protein PCP OS=Lingulodinium polyedrum PE=4 SV=1	1	93.3	78	157	382	ADWDSVNAALGR
11	tr|O00941|O00941_LINPO	Peridinin-chlorophyll a-binding protein PCP OS=Lingulodinium polyedrum PE=4 SV=1	1	93.3	78	157	382	DEIGDAAK
11	tr|O00941|O00941_LINPO	Peridinin-chlorophyll a-binding protein PCP OS=Lingulodinium polyedrum PE=4 SV=1	1	93.3	78	157	382	FQPLEALK
11	tr|O00941|O00941_LINPO	Peridinin-chlorophyll a-binding protein PCP OS=Lingulodinium polyedrum PE=4 SV=1	1	93.3	78	157	382	GVQADPK
11	tr|O00941|O00941_LINPO	Peridinin-chlorophyll a-binding protein PCP OS=Lingulodinium polyedrum PE=4 SV=1	1	93.3	78	157	382	NGADAEK
11	tr|O00941|O00941_LINPO	Peridinin-chlorophyll a-binding protein PCP OS=Lingulodinium polyedrum PE=4 SV=1	1	93.3	78	157	382	SLVNGADAEK
11	tr|O00941|O00941_LINPO	Peridinin-chlorophyll a-binding protein PCP OS=Lingulodinium polyedrum PE=4 SV=1	1	93.3	78	157	382	VNGADAEK
11	tr|O00941|O00941_LINPO	Peridinin-chlorophyll a-binding protein PCP OS=Lingulodinium polyedrum PE=4 SV=1	1	93.3	78	157	382	VVASVPK
11	tr|O00941|O00941_LINPO	Peridinin-chlorophyll a-binding protein PCP OS=Lingulodinium polyedrum PE=4 SV=1	1	93.3	78	157	382	VVASVPKK
11	tr|O00941|O00941_LINPO	Peridinin-chlorophyll a-binding protein PCP OS=Lingulodinium polyedrum PE=4 SV=1	1	93.3	78	157	382	ADWDSVNAALGR
11	tr|O00941|O00941_LINPO	Peridinin-chlorophyll a-binding protein PCP OS=Lingulodinium polyedrum PE=4 SV=1	1	93.3	78	157	382	AIDKM[147]IVM[147]GVQADPK
11	tr|O00941|O00941_LINPO	Peridinin-chlorophyll a-binding protein PCP OS=Lingulodinium polyedrum PE=4 SV=1	1	93.3	78	157	382	AIGSISGPNGVTSR
11	tr|O00941|O00941_LINPO	Peridinin-chlorophyll a-binding protein PCP OS=Lingulodinium polyedrum PE=4 SV=1	1	93.3	78	157	382	AYEGFLAFK
11	tr|O00941|O00941_LINPO	Peridinin-chlorophyll a-binding protein PCP OS=Lingulodinium polyedrum PE=4 SV=1	1	93.3	78	157	382	EVDWNNGIFLQAPGK
11	tr|O00941|O00941_LINPO	Peridinin-chlorophyll a-binding protein PCP OS=Lingulodinium polyedrum PE=4 SV=1	1	93.3	78	157	382	KLSEQSYPFLK
11	tr|O00941|O00941_LINPO	Peridinin-chlorophyll a-binding protein PCP OS=Lingulodinium polyedrum PE=4 SV=1	1	93.3	78	157	382	LGDSSYAFAK
11	tr|O00941|O00941_LINPO	Peridinin-chlorophyll a-binding protein PCP OS=Lingulodinium polyedrum PE=4 SV=1	1	93.3	78	157	382	M[147]IVM[147]GVQADPK
11	tr|O00941|O00941_LINPO	Peridinin-chlorophyll a-binding protein PCP OS=Lingulodinium polyedrum PE=4 SV=1	1	93.3	78	157	382	SQVSTAAAPPTVSASGDAIGEAAK
11	tr|O00941|O00941_LINPO	Peridinin-chlorophyll a-binding protein PCP OS=Lingulodinium polyedrum PE=4 SV=1	1	93.3	78	157	382	SQVSTAAAPPTVSASGDAIGEAAKK
11	tr|O00941|O00941_LINPO	Peridinin-chlorophyll a-binding protein PCP OS=Lingulodinium polyedrum PE=4 SV=1	1	93.3	78	157	382	AAAQAHHQAIGSIDANGVTSLADYSAVNAALGR
11	tr|O00941|O00941_LINPO	Peridinin-chlorophyll a-binding protein PCP OS=Lingulodinium polyedrum PE=4 SV=1	1	93.3	78	157	382	AIDKM[147]IVM[147]GVQADPK
11	tr|O00941|O00941_LINPO	Peridinin-chlorophyll a-binding protein PCP OS=Lingulodinium polyedrum PE=4 SV=1	1	93.3	78	157	382	RSQVSTAAAPPTVSASGDAIGEAAK
11	tr|O00941|O00941_LINPO	Peridinin-chlorophyll a-binding protein PCP OS=Lingulodinium polyedrum PE=4 SV=1	1	93.3	78	157	382	SQVSTAAAPPTVSASGDAIGEAAK
11	tr|O00941|O00941_LINPO	Peridinin-chlorophyll a-binding protein PCP OS=Lingulodinium polyedrum PE=4 SV=1	1	93.3	78	157	382	LSEQSYPFLK
11	tr|O00941|O00941_LINPO	Peridinin-chlorophyll a-binding protein PCP OS=Lingulodinium polyedrum PE=4 SV=1	1	93.3	78	157	382	MIVMGVQADPK
11	tr|O00941|O00941_LINPO	Peridinin-chlorophyll a-binding protein PCP OS=Lingulodinium polyedrum PE=4 SV=1	1	93.3	78	157	382	SLVNGADAEK
11	tr|O00941|O00941_LINPO	Peridinin-chlorophyll a-binding protein PCP OS=Lingulodinium polyedrum PE=4 SV=1	1	93.3	78	157	382	VVASVPKK
11	tr|O00941|O00941_LINPO	Peridinin-chlorophyll a-binding protein PCP OS=Lingulodinium polyedrum PE=4 SV=1	1	93.3	78	157	382	RSQVSTAAAPPTVSASGDAIGEAAKK
11	tr|O00941|O00941_LINPO	Peridinin-chlorophyll a-binding protein PCP OS=Lingulodinium polyedrum PE=4 SV=1	1	93.3	78	157	382	KLGDSSYAFAK
11	tr|O00941|O00941_LINPO	Peridinin-chlorophyll a-binding protein PCP OS=Lingulodinium polyedrum PE=4 SV=1	1	93.3	78	157	382	RSQVSTAAAPPTVSASGDAIGEAAK
11	tr|O00941|O00941_LINPO	Peridinin-chlorophyll a-binding protein PCP OS=Lingulodinium polyedrum PE=4 SV=1	1	93.3	78	157	382	DINWLSDIYLKPLPDATISK
11	tr|O00941|O00941_LINPO	Peridinin-chlorophyll a-binding protein PCP OS=Lingulodinium polyedrum PE=4 SV=1	1	93.3	78	157	382	SQVSTAAAPPTVSASGDAIGEAAKK
11	tr|O00941|O00941_LINPO	Peridinin-chlorophyll a-binding protein PCP OS=Lingulodinium polyedrum PE=4 SV=1	1	93.3	78	157	382	AYEGFLAFKDVVKR
11	tr|O00941|O00941_LINPO	Peridinin-chlorophyll a-binding protein PCP OS=Lingulodinium polyedrum PE=4 SV=1	1	93.3	78	157	382	SLVNGADAEKAYEGFLAFK
11	tr|O00941|O00941_LINPO	Peridinin-chlorophyll a-binding protein PCP OS=Lingulodinium polyedrum PE=4 SV=1	1	93.3	78	157	382	AYEGFLAFKDVVK
11	tr|O00941|O00941_LINPO	Peridinin-chlorophyll a-binding protein PCP OS=Lingulodinium polyedrum PE=4 SV=1	1	93.3	78	157	382	GIFLQAPGK
11	tr|O00941|O00941_LINPO	Peridinin-chlorophyll a-binding protein PCP OS=Lingulodinium polyedrum PE=4 SV=1	1	93.3	78	157	382	M[147]IM[147]M[147]GAK
11	tr|O00941|O00941_LINPO	Peridinin-chlorophyll a-binding protein PCP OS=Lingulodinium polyedrum PE=4 SV=1	1	93.3	78	157	382	KM[147]VM[147]DVYNSM[147]ASLVAPTVPN
11	tr|O00941|O00941_LINPO	Peridinin-chlorophyll a-binding protein PCP OS=Lingulodinium polyedrum PE=4 SV=1	1	93.3	78	157	382	DVYNSVSGITDPAVPAYMK
11	tr|O00941|O00941_LINPO	Peridinin-chlorophyll a-binding protein PCP OS=Lingulodinium polyedrum PE=4 SV=1	1	93.3	78	157	382	IGDAAKK
11	tr|O00941|O00941_LINPO	Peridinin-chlorophyll a-binding protein PCP OS=Lingulodinium polyedrum PE=4 SV=1	1	93.3	78	157	382	DEIGDAAKK
11	tr|O00941|O00941_LINPO	Peridinin-chlorophyll a-binding protein PCP OS=Lingulodinium polyedrum PE=4 SV=1	1	93.3	78	157	382	KLSEQSY
11	tr|O00941|O00941_LINPO	Peridinin-chlorophyll a-binding protein PCP OS=Lingulodinium polyedrum PE=4 SV=1	1	93.3	78	157	382	NGIFLQAPGK
11	tr|O00941|O00941_LINPO	Peridinin-chlorophyll a-binding protein PCP OS=Lingulodinium polyedrum PE=4 SV=1	1	93.3	78	157	382	LDANAAAK
11	tr|O00941|O00941_LINPO	Peridinin-chlorophyll a-binding protein PCP OS=Lingulodinium polyedrum PE=4 SV=1	1	93.3	78	157	382	SEQSYPFLK
11	tr|O00941|O00941_LINPO	Peridinin-chlorophyll a-binding protein PCP OS=Lingulodinium polyedrum PE=4 SV=1	1	93.3	78	157	382	SGDAIGEAAKK
11	tr|O00941|O00941_LINPO	Peridinin-chlorophyll a-binding protein PCP OS=Lingulodinium polyedrum PE=4 SV=1	1	93.3	78	157	382	GDAIGEAAK
11	tr|O00941|O00941_LINPO	Peridinin-chlorophyll a-binding protein PCP OS=Lingulodinium polyedrum PE=4 SV=1	1	93.3	78	157	382	VIASVPEAT
11	tr|O00941|O00941_LINPO	Peridinin-chlorophyll a-binding protein PCP OS=Lingulodinium polyedrum PE=4 SV=1	1	93.3	78	157	382	VNAALGR
11	tr|O00941|O00941_LINPO	Peridinin-chlorophyll a-binding protein PCP OS=Lingulodinium polyedrum PE=4 SV=1	1	93.3	78	157	382	DVVQAASQV
11	tr|O00941|O00941_LINPO	Peridinin-chlorophyll a-binding protein PCP OS=Lingulodinium polyedrum PE=4 SV=1	1	93.3	78	157	382	IGEAAKK
11	tr|O00941|O00941_LINPO	Peridinin-chlorophyll a-binding protein PCP OS=Lingulodinium polyedrum PE=4 SV=1	1	93.3	78	157	382	EALKAIDK
11	tr|O00941|O00941_LINPO	Peridinin-chlorophyll a-binding protein PCP OS=Lingulodinium polyedrum PE=4 SV=1	1	93.3	78	157	382	M[147]IMMGAKA
11	tr|O00941|O00941_LINPO	Peridinin-chlorophyll a-binding protein PCP OS=Lingulodinium polyedrum PE=4 SV=1	1	93.3	78	157	382	MIMMGAK
11	tr|O00941|O00941_LINPO	Peridinin-chlorophyll a-binding protein PCP OS=Lingulodinium polyedrum PE=4 SV=1	1	93.3	78	157	382	EQSYPFLK
11	tr|O00941|O00941_LINPO	Peridinin-chlorophyll a-binding protein PCP OS=Lingulodinium polyedrum PE=4 SV=1	1	93.3	78	157	382	SVNPLDANAAAK
11	tr|O00941|O00941_LINPO	Peridinin-chlorophyll a-binding protein PCP OS=Lingulodinium polyedrum PE=4 SV=1	1	93.3	78	157	382	DAIGEAAKK
11	tr|O00941|O00941_LINPO	Peridinin-chlorophyll a-binding protein PCP OS=Lingulodinium polyedrum PE=4 SV=1	1	93.3	78	157	382	MIVM[147]GVQ
11	tr|O00941|O00941_LINPO	Peridinin-chlorophyll a-binding protein PCP OS=Lingulodinium polyedrum PE=4 SV=1	1	93.3	78	157	382	M[147]IVMGVQ
11	tr|O00941|O00941_LINPO	Peridinin-chlorophyll a-binding protein PCP OS=Lingulodinium polyedrum PE=4 SV=1	1	93.3	78	157	382	DEIGDAAK
11	tr|O00941|O00941_LINPO	Peridinin-chlorophyll a-binding protein PCP OS=Lingulodinium polyedrum PE=4 SV=1	1	93.3	78	157	382	SQVSTAAAP
11	tr|O00941|O00941_LINPO	Peridinin-chlorophyll a-binding protein PCP OS=Lingulodinium polyedrum PE=4 SV=1	1	93.3	78	157	382	M[147]IM[147]M[147]GAK
11	tr|O00941|O00941_LINPO	Peridinin-chlorophyll a-binding protein PCP OS=Lingulodinium polyedrum PE=4 SV=1	1	93.3	78	157	382	SVNAALGR
11	tr|O00941|O00941_LINPO	Peridinin-chlorophyll a-binding protein PCP OS=Lingulodinium polyedrum PE=4 SV=1	1	93.3	78	157	382	AIDKM[147]IM[147]M[147]GAK
11	tr|O00941|O00941_LINPO	Peridinin-chlorophyll a-binding protein PCP OS=Lingulodinium polyedrum PE=4 SV=1	1	93.3	78	157	382	AKAFYTFK
12	tr|O96366|O96366_LINPO	Glyceraldehyde-3-phosphate dehydrogenase OS=Lingulodinium polyedrum GN=GAPDH PE=2 SV=1	1	72.5	42	63	437	EICAEIKR
12	tr|O96366|O96366_LINPO	Glyceraldehyde-3-phosphate dehydrogenase OS=Lingulodinium polyedrum GN=GAPDH PE=2 SV=1	1	72.5	42	63	437	LRGVTSESA
12	tr|O96366|O96366_LINPO	Glyceraldehyde-3-phosphate dehydrogenase OS=Lingulodinium polyedrum GN=GAPDH PE=2 SV=1	1	72.5	42	63	437	PSSTGAAK
12	tr|O96366|O96366_LINPO	Glyceraldehyde-3-phosphate dehydrogenase OS=Lingulodinium polyedrum GN=GAPDH PE=2 SV=1	1	72.5	42	63	437	ATGIAINGFGR
12	tr|O96366|O96366_LINPO	Glyceraldehyde-3-phosphate dehydrogenase OS=Lingulodinium polyedrum GN=GAPDH PE=2 SV=1	1	72.5	42	63	437	LVM[147]WYDNEWGYSCR
12	tr|O96366|O96366_LINPO	Glyceraldehyde-3-phosphate dehydrogenase OS=Lingulodinium polyedrum GN=GAPDH PE=2 SV=1	1	72.5	42	63	437	VPTIDVSVVDLTCELEK
12	tr|O96366|O96366_LINPO	Glyceraldehyde-3-phosphate dehydrogenase OS=Lingulodinium polyedrum GN=GAPDH PE=2 SV=1	1	72.5	42	63	437	IAMKDPEVELKLI
12	tr|O96366|O96366_LINPO	Glyceraldehyde-3-phosphate dehydrogenase OS=Lingulodinium polyedrum GN=GAPDH PE=2 SV=1	1	72.5	42	63	437	AASGNIIPSSTGAAK
12	tr|O96366|O96366_LINPO	Glyceraldehyde-3-phosphate dehydrogenase OS=Lingulodinium polyedrum GN=GAPDH PE=2 SV=1	1	72.5	42	63	437	ATTYEEICAEIK
12	tr|O96366|O96366_LINPO	Glyceraldehyde-3-phosphate dehydrogenase OS=Lingulodinium polyedrum GN=GAPDH PE=2 SV=1	1	72.5	42	63	437	GLM[147]TTIHAM[147]TASQPTVDSASK
12	tr|O96366|O96366_LINPO	Glyceraldehyde-3-phosphate dehydrogenase OS=Lingulodinium polyedrum GN=GAPDH PE=2 SV=1	1	72.5	42	63	437	IAM[147]KDPEVELK
12	tr|O96366|O96366_LINPO	Glyceraldehyde-3-phosphate dehydrogenase OS=Lingulodinium polyedrum GN=GAPDH PE=2 SV=1	1	72.5	42	63	437	AGIM[147]LDPTFVK
12	tr|O96366|O96366_LINPO	Glyceraldehyde-3-phosphate dehydrogenase OS=Lingulodinium polyedrum GN=GAPDH PE=2 SV=1	1	72.5	42	63	437	AGIMLDPTFVK
12	tr|O96366|O96366_LINPO	Glyceraldehyde-3-phosphate dehydrogenase OS=Lingulodinium polyedrum GN=GAPDH PE=2 SV=1	1	72.5	42	63	437	GLM[147]TTIHAM[147]TASQPTVDSASKK
12	tr|O96366|O96366_LINPO	Glyceraldehyde-3-phosphate dehydrogenase OS=Lingulodinium polyedrum GN=GAPDH PE=2 SV=1	1	72.5	42	63	437	GKLTGM[147]AFR
12	tr|O96366|O96366_LINPO	Glyceraldehyde-3-phosphate dehydrogenase OS=Lingulodinium polyedrum GN=GAPDH PE=2 SV=1	1	72.5	42	63	437	LTGM[147]AFR
12	tr|O96366|O96366_LINPO	Glyceraldehyde-3-phosphate dehydrogenase OS=Lingulodinium polyedrum GN=GAPDH PE=2 SV=1	1	72.5	42	63	437	IAM[147]KDPEVELK
12	tr|O96366|O96366_LINPO	Glyceraldehyde-3-phosphate dehydrogenase OS=Lingulodinium polyedrum GN=GAPDH PE=2 SV=1	1	72.5	42	63	437	LSGAAAR
12	tr|O96366|O96366_LINPO	Glyceraldehyde-3-phosphate dehydrogenase OS=Lingulodinium polyedrum GN=GAPDH PE=2 SV=1	1	72.5	42	63	437	TAAPLER
12	tr|O96366|O96366_LINPO	Glyceraldehyde-3-phosphate dehydrogenase OS=Lingulodinium polyedrum GN=GAPDH PE=2 SV=1	1	72.5	42	63	437	IVFSAPA
12	tr|O96366|O96366_LINPO	Glyceraldehyde-3-phosphate dehydrogenase OS=Lingulodinium polyedrum GN=GAPDH PE=2 SV=1	1	72.5	42	63	437	DYLAYM[147]M[147]K
12	tr|O96366|O96366_LINPO	Glyceraldehyde-3-phosphate dehydrogenase OS=Lingulodinium polyedrum GN=GAPDH PE=2 SV=1	1	72.5	42	63	437	ALVIDGLK
12	tr|O96366|O96366_LINPO	Glyceraldehyde-3-phosphate dehydrogenase OS=Lingulodinium polyedrum GN=GAPDH PE=2 SV=1	1	72.5	42	63	437	AASGNII
12	tr|O96366|O96366_LINPO	Glyceraldehyde-3-phosphate dehydrogenase OS=Lingulodinium polyedrum GN=GAPDH PE=2 SV=1	1	72.5	42	63	437	YDTIHGK
12	tr|O96366|O96366_LINPO	Glyceraldehyde-3-phosphate dehydrogenase OS=Lingulodinium polyedrum GN=GAPDH PE=2 SV=1	1	72.5	42	63	437	RSEGDMK
12	tr|O96366|O96366_LINPO	Glyceraldehyde-3-phosphate dehydrogenase OS=Lingulodinium polyedrum GN=GAPDH PE=2 SV=1	1	72.5	42	63	437	AVNDALGIK
12	tr|O96366|O96366_LINPO	Glyceraldehyde-3-phosphate dehydrogenase OS=Lingulodinium polyedrum GN=GAPDH PE=2 SV=1	1	72.5	42	63	437	EICAEIK
12	tr|O96366|O96366_LINPO	Glyceraldehyde-3-phosphate dehydrogenase OS=Lingulodinium polyedrum GN=GAPDH PE=2 SV=1	1	72.5	42	63	437	LINASYDA
13	tr|O96367|O96367_LINPO	Glyceraldehyde-3-phosphate dehydrogenase OS=Lingulodinium polyedrum GN=GAPDH PE=2 SV=1	1	49.1	10	18	348	PSSTGAAK
13	tr|O96367|O96367_LINPO	Glyceraldehyde-3-phosphate dehydrogenase OS=Lingulodinium polyedrum GN=GAPDH PE=2 SV=1	1	49.1	10	18	348	LTGM[147]AFR
13	tr|O96367|O96367_LINPO	Glyceraldehyde-3-phosphate dehydrogenase OS=Lingulodinium polyedrum GN=GAPDH PE=2 SV=1	1	49.1	10	18	348	DDIVAAIK
14	tr|Q24LT3|Q24LT3_LINPO	Phosphoribulokinase OS=Lingulodinium polyedrum GN=PRK PE=2 SV=1	1	69.6	32	44	418	LPDFSAYV
14	tr|Q24LT3|Q24LT3_LINPO	Phosphoribulokinase OS=Lingulodinium polyedrum GN=PRK PE=2 SV=1	1	69.6	32	44	418	M[147]LQTVIAMK
14	tr|Q24LT3|Q24LT3_LINPO	Phosphoribulokinase OS=Lingulodinium polyedrum GN=PRK PE=2 SV=1	1	69.6	32	44	418	GWTEEQVREDIEK
14	tr|Q24LT3|Q24LT3_LINPO	Phosphoribulokinase OS=Lingulodinium polyedrum GN=PRK PE=2 SV=1	1	69.6	32	44	418	YEPSDQGLPYLK
14	tr|Q24LT3|Q24LT3_LINPO	Phosphoribulokinase OS=Lingulodinium polyedrum GN=PRK PE=2 SV=1	1	69.6	32	44	418	LTEAMVK
14	tr|Q24LT3|Q24LT3_LINPO	Phosphoribulokinase OS=Lingulodinium polyedrum GN=PRK PE=2 SV=1	1	69.6	32	44	418	RILGALG
14	tr|Q24LT3|Q24LT3_LINPO	Phosphoribulokinase OS=Lingulodinium polyedrum GN=PRK PE=2 SV=1	1	69.6	32	44	418	REEDGIK
14	tr|Q24LT3|Q24LT3_LINPO	Phosphoribulokinase OS=Lingulodinium polyedrum GN=PRK PE=2 SV=1	1	69.6	32	44	418	NMEAQLK
14	tr|Q24LT3|Q24LT3_LINPO	Phosphoribulokinase OS=Lingulodinium polyedrum GN=PRK PE=2 SV=1	1	69.6	32	44	418	M[147]PIVPATK
14	tr|Q24LT3|Q24LT3_LINPO	Phosphoribulokinase OS=Lingulodinium polyedrum GN=PRK PE=2 SV=1	1	69.6	32	44	418	AFPPISLK
14	tr|Q24LT3|Q24LT3_LINPO	Phosphoribulokinase OS=Lingulodinium polyedrum GN=PRK PE=2 SV=1	1	69.6	32	44	418	LPDFSAYVDPQK
14	tr|Q24LT3|Q24LT3_LINPO	Phosphoribulokinase OS=Lingulodinium polyedrum GN=PRK PE=2 SV=1	1	69.6	32	44	418	ARDQLDL
14	tr|Q24LT3|Q24LT3_LINPO	Phosphoribulokinase OS=Lingulodinium polyedrum GN=PRK PE=2 SV=1	1	69.6	32	44	418	NM[147]EAQLK
14	tr|Q24LT3|Q24LT3_LINPO	Phosphoribulokinase OS=Lingulodinium polyedrum GN=PRK PE=2 SV=1	1	69.6	32	44	418	EKLTGGK
15	tr|Q2I6N8|Q2I6N8_LINPO	ATP synthase beta chain (Fragment) OS=Lingulodinium polyedrum GN=atpB PE=2 SV=1	1	51.4	13	20	258	YVSLGNTIFGFSK
15	tr|Q2I6N8|Q2I6N8_LINPO	ATP synthase beta chain (Fragment) OS=Lingulodinium polyedrum GN=atpB PE=2 SV=1	1	51.4	13	20	258	GIYPAVDPFNSTSK
15	tr|Q2I6N8|Q2I6N8_LINPO	ATP synthase beta chain (Fragment) OS=Lingulodinium polyedrum GN=atpB PE=2 SV=1	1	51.4	13	20	258	VERTREGN
15	tr|Q2I6N8|Q2I6N8_LINPO	ATP synthase beta chain (Fragment) OS=Lingulodinium polyedrum GN=atpB PE=2 SV=1	1	51.4	13	20	258	AVTVLSR
15	tr|Q2I6N8|Q2I6N8_LINPO	ATP synthase beta chain (Fragment) OS=Lingulodinium polyedrum GN=atpB PE=2 SV=1	1	51.4	13	20	258	GNTIFGFSK
16	tr|Q2I6P0|Q2I6P0_LINPO	ATP synthase subunit alpha, chloroplastic OS=Lingulodinium polyedrum GN=atpA PE=2 SV=1	1	30.9	17	22	471	MLDDLSR
16	tr|Q2I6P0|Q2I6P0_LINPO	ATP synthase subunit alpha, chloroplastic OS=Lingulodinium polyedrum GN=atpA PE=2 SV=1	1	30.9	17	22	471	YVPIGQK
16	tr|Q2I6P0|Q2I6P0_LINPO	ATP synthase subunit alpha, chloroplastic OS=Lingulodinium polyedrum GN=atpA PE=2 SV=1	1	30.9	17	22	471	EAFPGEIFFVHSR
16	tr|Q2I6P0|Q2I6P0_LINPO	ATP synthase subunit alpha, chloroplastic OS=Lingulodinium polyedrum GN=atpA PE=2 SV=1	1	30.9	17	22	471	AASVLEVFL
16	tr|Q2I6P0|Q2I6P0_LINPO	ATP synthase subunit alpha, chloroplastic OS=Lingulodinium polyedrum GN=atpA PE=2 SV=1	1	30.9	17	22	471	GQRELVVGDR
16	tr|Q2I6P0|Q2I6P0_LINPO	ATP synthase subunit alpha, chloroplastic OS=Lingulodinium polyedrum GN=atpA PE=2 SV=1	1	30.9	17	22	471	ITEGAKV
16	tr|Q2I6P0|Q2I6P0_LINPO	ATP synthase subunit alpha, chloroplastic OS=Lingulodinium polyedrum GN=atpA PE=2 SV=1	1	30.9	17	22	471	AASVLEVF
16	tr|Q2I6P0|Q2I6P0_LINPO	ATP synthase subunit alpha, chloroplastic OS=Lingulodinium polyedrum GN=atpA PE=2 SV=1	1	30.9	17	22	471	SPAPGIIDR
16	tr|Q2I6P0|Q2I6P0_LINPO	ATP synthase subunit alpha, chloroplastic OS=Lingulodinium polyedrum GN=atpA PE=2 SV=1	1	30.9	17	22	471	AFVSETFR
16	tr|Q2I6P0|Q2I6P0_LINPO	ATP synthase subunit alpha, chloroplastic OS=Lingulodinium polyedrum GN=atpA PE=2 SV=1	1	30.9	17	22	471	DSMVPIGR
16	tr|Q2I6P0|Q2I6P0_LINPO	ATP synthase subunit alpha, chloroplastic OS=Lingulodinium polyedrum GN=atpA PE=2 SV=1	1	30.9	17	22	471	MKYVSGSYK
17	tr|Q2I6P3|Q2I6P3_LINPO	Photosystem I P700 chlorophyll a apoprotein A1 (Fragment) OS=Lingulodinium polyedrum GN=psaA PE=2 SV=1	1	24.7	19	25	751	GGTCQIS
17	tr|Q2I6P3|Q2I6P3_LINPO	Photosystem I P700 chlorophyll a apoprotein A1 (Fragment) OS=Lingulodinium polyedrum GN=psaA PE=2 SV=1	1	24.7	19	25	751	RPAAM[147]LTR
17	tr|Q2I6P3|Q2I6P3_LINPO	Photosystem I P700 chlorophyll a apoprotein A1 (Fragment) OS=Lingulodinium polyedrum GN=psaA PE=2 SV=1	1	24.7	19	25	751	VEEVGVGVGK
17	tr|Q2I6P3|Q2I6P3_LINPO	Photosystem I P700 chlorophyll a apoprotein A1 (Fragment) OS=Lingulodinium polyedrum GN=psaA PE=2 SV=1	1	24.7	19	25	751	LLFSRSSR
17	tr|Q2I6P3|Q2I6P3_LINPO	Photosystem I P700 chlorophyll a apoprotein A1 (Fragment) OS=Lingulodinium polyedrum GN=psaA PE=2 SV=1	1	24.7	19	25	751	NNVNTLGR
17	tr|Q2I6P3|Q2I6P3_LINPO	Photosystem I P700 chlorophyll a apoprotein A1 (Fragment) OS=Lingulodinium polyedrum GN=psaA PE=2 SV=1	1	24.7	19	25	751	SM[147]QTHKL
18	tr|Q2I6P4|Q2I6P4_LINPO	Cytochrome b6 OS=Lingulodinium polyedrum GN=petB PE=2 SV=1	1	23.3	5	5	223	YLTGGFK
18	tr|Q2I6P4|Q2I6P4_LINPO	Cytochrome b6 OS=Lingulodinium polyedrum GN=petB PE=2 SV=1	1	23.3	5	5	223	ISVIILRGGF
19	tr|Q2I6P6|Q2I6P6_LINPO	Photosystem II D2 protein OS=Lingulodinium polyedrum GN=psbD PE=2 SV=1	1	28.3	12	22	385	FGVAFSNK
19	tr|Q2I6P6|Q2I6P6_LINPO	Photosystem II D2 protein OS=Lingulodinium polyedrum GN=psbD PE=2 SV=1	1	28.3	12	22	385	AYDFISQELK
19	tr|Q2I6P6|Q2I6P6_LINPO	Photosystem II D2 protein OS=Lingulodinium polyedrum GN=psbD PE=2 SV=1	1	28.3	12	22	385	NILLNEGIR
19	tr|Q2I6P6|Q2I6P6_LINPO	Photosystem II D2 protein OS=Lingulodinium polyedrum GN=psbD PE=2 SV=1	1	28.3	12	22	385	LWM[147]AVQDQPHE
19	tr|Q2I6P6|Q2I6P6_LINPO	Photosystem II D2 protein OS=Lingulodinium polyedrum GN=psbD PE=2 SV=1	1	28.3	12	22	385	GYLPGSV
19	tr|Q2I6P6|Q2I6P6_LINPO	Photosystem II D2 protein OS=Lingulodinium polyedrum GN=psbD PE=2 SV=1	1	28.3	12	22	385	GVAYTTFR
20	tr|Q2I6P8|Q2I6P8_LINPO	Photosystem II CP47 reaction center protein OS=Lingulodinium polyedrum GN=psbB PE=2 SV=1	1	41.8	21	28	518	KSQFGEIFTFDKK
20	tr|Q2I6P8|Q2I6P8_LINPO	Photosystem II CP47 reaction center protein OS=Lingulodinium polyedrum GN=psbB PE=2 SV=1	1	41.8	21	28	518	RVNNIVGK
20	tr|Q2I6P8|Q2I6P8_LINPO	Photosystem II CP47 reaction center protein OS=Lingulodinium polyedrum GN=psbB PE=2 SV=1	1	41.8	21	28	518	NFDLLLNK
20	tr|Q2I6P8|Q2I6P8_LINPO	Photosystem II CP47 reaction center protein OS=Lingulodinium polyedrum GN=psbB PE=2 SV=1	1	41.8	21	28	518	TGQTDGVFR
20	tr|Q2I6P8|Q2I6P8_LINPO	Photosystem II CP47 reaction center protein OS=Lingulodinium polyedrum GN=psbB PE=2 SV=1	1	41.8	21	28	518	NEKLGEDVNNA
20	tr|Q2I6P8|Q2I6P8_LINPO	Photosystem II CP47 reaction center protein OS=Lingulodinium polyedrum GN=psbB PE=2 SV=1	1	41.8	21	28	518	SGPM[147]IKGDGI
20	tr|Q2I6P8|Q2I6P8_LINPO	Photosystem II CP47 reaction center protein OS=Lingulodinium polyedrum GN=psbB PE=2 SV=1	1	41.8	21	28	518	ALFRDIWT
20	tr|Q2I6P8|Q2I6P8_LINPO	Photosystem II CP47 reaction center protein OS=Lingulodinium polyedrum GN=psbB PE=2 SV=1	1	41.8	21	28	518	RSGPM[147]IK
20	tr|Q2I6P8|Q2I6P8_LINPO	Photosystem II CP47 reaction center protein OS=Lingulodinium polyedrum GN=psbB PE=2 SV=1	1	41.8	21	28	518	M[147]GLPWFRV
20	tr|Q2I6P8|Q2I6P8_LINPO	Photosystem II CP47 reaction center protein OS=Lingulodinium polyedrum GN=psbB PE=2 SV=1	1	41.8	21	28	518	IDQGGSVR
20	tr|Q2I6P8|Q2I6P8_LINPO	Photosystem II CP47 reaction center protein OS=Lingulodinium polyedrum GN=psbB PE=2 SV=1	1	41.8	21	28	518	LLGM[147]GNIESV
21	tr|Q39907|Q39907_LINPO	Uncharacterized protein OS=Lingulodinium polyedrum PE=2 SV=1	1	54.3	22	34	394	SQTSAPK
21	tr|Q39907|Q39907_LINPO	Uncharacterized protein OS=Lingulodinium polyedrum PE=2 SV=1	1	54.3	22	34	394	VLAVAIGAGA
21	tr|Q39907|Q39907_LINPO	Uncharacterized protein OS=Lingulodinium polyedrum PE=2 SV=1	1	54.3	22	34	394	MASACRPQ
21	tr|Q39907|Q39907_LINPO	Uncharacterized protein OS=Lingulodinium polyedrum PE=2 SV=1	1	54.3	22	34	394	HVAAAM[147]VS
21	tr|Q39907|Q39907_LINPO	Uncharacterized protein OS=Lingulodinium polyedrum PE=2 SV=1	1	54.3	22	34	394	AFVSSCSLDR
21	tr|Q39907|Q39907_LINPO	Uncharacterized protein OS=Lingulodinium polyedrum PE=2 SV=1	1	54.3	22	34	394	QRPGSER
21	tr|Q39907|Q39907_LINPO	Uncharacterized protein OS=Lingulodinium polyedrum PE=2 SV=1	1	54.3	22	34	394	WASTAAG
22	tr|Q39908|Q39908_LINPO	CAMP-dependent protein kinase OS=Lingulodinium polyedrum PE=2 SV=1	1	42.2	17	22	338	AIPPPFKP
22	tr|Q39908|Q39908_LINPO	CAMP-dependent protein kinase OS=Lingulodinium polyedrum PE=2 SV=1	1	42.2	17	22	338	KEFLRALLQR
22	tr|Q39908|Q39908_LINPO	CAMP-dependent protein kinase OS=Lingulodinium polyedrum PE=2 SV=1	1	42.2	17	22	338	NPDARLAGG
22	tr|Q39908|Q39908_LINPO	CAMP-dependent protein kinase OS=Lingulodinium polyedrum PE=2 SV=1	1	42.2	17	22	338	GLDWVALEK
22	tr|Q39908|Q39908_LINPO	CAMP-dependent protein kinase OS=Lingulodinium polyedrum PE=2 SV=1	1	42.2	17	22	338	RGELTYPDY
22	tr|Q39908|Q39908_LINPO	CAMP-dependent protein kinase OS=Lingulodinium polyedrum PE=2 SV=1	1	42.2	17	22	338	YVSVLAK
22	tr|Q39908|Q39908_LINPO	CAMP-dependent protein kinase OS=Lingulodinium polyedrum PE=2 SV=1	1	42.2	17	22	338	DFVGQPVV
22	tr|Q39908|Q39908_LINPO	CAMP-dependent protein kinase OS=Lingulodinium polyedrum PE=2 SV=1	1	42.2	17	22	338	LYAM[147]KMLR
23	tr|Q39910|Q39910_LINPO	Luciferin binding protein OS=Lingulodinium polyedrum PE=2 SV=1	1	57.7	7	11	681	AIQASIK
23	tr|Q39910|Q39910_LINPO	Luciferin binding protein OS=Lingulodinium polyedrum PE=2 SV=1	1	57.7	7	11	681	DIERVVALR
23	tr|Q39910|Q39910_LINPO	Luciferin binding protein OS=Lingulodinium polyedrum PE=2 SV=1	1	57.7	7	11	681	GAAPAPSTK
23	tr|Q39910|Q39910_LINPO	Luciferin binding protein OS=Lingulodinium polyedrum PE=2 SV=1	1	57.7	7	11	681	KLVNGVE
23	tr|Q39910|Q39910_LINPO	Luciferin binding protein OS=Lingulodinium polyedrum PE=2 SV=1	1	57.7	7	11	681	RDMPGYM[147]QR
23	tr|Q39910|Q39910_LINPO	Luciferin binding protein OS=Lingulodinium polyedrum PE=2 SV=1	1	57.7	7	11	681	THPLQIE
23	tr|Q39910|Q39910_LINPO	Luciferin binding protein OS=Lingulodinium polyedrum PE=2 SV=1	1	57.7	7	11	681	WRAMVESIR
23	tr|Q39910|Q39910_LINPO	Luciferin binding protein OS=Lingulodinium polyedrum PE=2 SV=1	1	57.7	7	11	681	LEMFSHHSK
23	tr|Q39910|Q39910_LINPO	Luciferin binding protein OS=Lingulodinium polyedrum PE=2 SV=1	1	57.7	7	11	681	TVTDNVR
23	tr|Q39910|Q39910_LINPO	Luciferin binding protein OS=Lingulodinium polyedrum PE=2 SV=1	1	57.7	7	11	681	KM[147]TLKATG
23	tr|Q39910|Q39910_LINPO	Luciferin binding protein OS=Lingulodinium polyedrum PE=2 SV=1	1	57.7	7	11	681	EPVEKM[147]IR
23	tr|Q39910|Q39910_LINPO	Luciferin binding protein OS=Lingulodinium polyedrum PE=2 SV=1	1	57.7	7	11	681	LPSQTELV
23	tr|Q39910|Q39910_LINPO	Luciferin binding protein OS=Lingulodinium polyedrum PE=2 SV=1	1	57.7	7	11	681	NPAESGL
23	tr|Q39910|Q39910_LINPO	Luciferin binding protein OS=Lingulodinium polyedrum PE=2 SV=1	1	57.7	7	11	681	QPSNVER
23	tr|Q39910|Q39910_LINPO	Luciferin binding protein OS=Lingulodinium polyedrum PE=2 SV=1	1	57.7	7	11	681	LPSQTELVG
23	tr|Q39910|Q39910_LINPO	Luciferin binding protein OS=Lingulodinium polyedrum PE=2 SV=1	1	57.7	7	11	681	FLANEGK
23	tr|Q39910|Q39910_LINPO	Luciferin binding protein OS=Lingulodinium polyedrum PE=2 SV=1	1	57.7	7	11	681	FSHHSKDEM[147]R
24	tr|Q39911|Q39911_LINPO	Luciferin binding protein OS=Lingulodinium polyedrum PE=2 SV=1	1	62.7	24	31	685	RDMPGYM[147]QR
24	tr|Q39911|Q39911_LINPO	Luciferin binding protein OS=Lingulodinium polyedrum PE=2 SV=1	1	62.7	24	31	685	THPLQIE
24	tr|Q39911|Q39911_LINPO	Luciferin binding protein OS=Lingulodinium polyedrum PE=2 SV=1	1	62.7	24	31	685	LDMPGTPTVSDNVR
24	tr|Q39911|Q39911_LINPO	Luciferin binding protein OS=Lingulodinium polyedrum PE=2 SV=1	1	62.7	24	31	685	KTFENIT
24	tr|Q39911|Q39911_LINPO	Luciferin binding protein OS=Lingulodinium polyedrum PE=2 SV=1	1	62.7	24	31	685	SPAIAGV
24	tr|Q39911|Q39911_LINPO	Luciferin binding protein OS=Lingulodinium polyedrum PE=2 SV=1	1	62.7	24	31	685	RAM[147]LESIR
24	tr|Q39911|Q39911_LINPO	Luciferin binding protein OS=Lingulodinium polyedrum PE=2 SV=1	1	62.7	24	31	685	TLTATGER
24	tr|Q39911|Q39911_LINPO	Luciferin binding protein OS=Lingulodinium polyedrum PE=2 SV=1	1	62.7	24	31	685	FLANEGK
24	tr|Q39911|Q39911_LINPO	Luciferin binding protein OS=Lingulodinium polyedrum PE=2 SV=1	1	62.7	24	31	685	APSTKVVGMGWT
24	tr|Q39911|Q39911_LINPO	Luciferin binding protein OS=Lingulodinium polyedrum PE=2 SV=1	1	62.7	24	31	685	AAWKAAQPT
24	tr|Q39911|Q39911_LINPO	Luciferin binding protein OS=Lingulodinium polyedrum PE=2 SV=1	1	62.7	24	31	685	NSVTSLAQR
24	tr|Q39911|Q39911_LINPO	Luciferin binding protein OS=Lingulodinium polyedrum PE=2 SV=1	1	62.7	24	31	685	WEALIYK
24	tr|Q39911|Q39911_LINPO	Luciferin binding protein OS=Lingulodinium polyedrum PE=2 SV=1	1	62.7	24	31	685	FEWLAPR
24	tr|Q39911|Q39911_LINPO	Luciferin binding protein OS=Lingulodinium polyedrum PE=2 SV=1	1	62.7	24	31	685	ASEVVGLGVR
24	tr|Q39911|Q39911_LINPO	Luciferin binding protein OS=Lingulodinium polyedrum PE=2 SV=1	1	62.7	24	31	685	RMDSTPPT
25	tr|Q42812|Q42812_LINPO	Serine/threonine-protein phosphatase OS=Lingulodinium polyedrum GN=PP1 PE=2 SV=1	1	42.1	11	14	308	PLTRMGVP
25	tr|Q42812|Q42812_LINPO	Serine/threonine-protein phosphatase OS=Lingulodinium polyedrum GN=PP1 PE=2 SV=1	1	42.1	11	14	308	EISGWGEN
25	tr|Q42812|Q42812_LINPO	Serine/threonine-protein phosphatase OS=Lingulodinium polyedrum GN=PP1 PE=2 SV=1	1	42.1	11	14	308	GDYVDRGK
25	tr|Q42812|Q42812_LINPO	Serine/threonine-protein phosphatase OS=Lingulodinium polyedrum GN=PP1 PE=2 SV=1	1	42.1	11	14	308	VSAVIDDK
26	tr|Q5SDR2|Q5SDR2_LINPO	Mitotic cyclin 1 (Fragment) OS=Lingulodinium polyedrum GN=Cyc1 PE=2 SV=1	1	43.9	28	39	484	CGSSEASYGLG
26	tr|Q5SDR2|Q5SDR2_LINPO	Mitotic cyclin 1 (Fragment) OS=Lingulodinium polyedrum GN=Cyc1 PE=2 SV=1	1	43.9	28	39	484	QAMRSKYR
26	tr|Q5SDR2|Q5SDR2_LINPO	Mitotic cyclin 1 (Fragment) OS=Lingulodinium polyedrum GN=Cyc1 PE=2 SV=1	1	43.9	28	39	484	HAPSHLAAAA
26	tr|Q5SDR2|Q5SDR2_LINPO	Mitotic cyclin 1 (Fragment) OS=Lingulodinium polyedrum GN=Cyc1 PE=2 SV=1	1	43.9	28	39	484	QSTPHAPM[147]
26	tr|Q5SDR2|Q5SDR2_LINPO	Mitotic cyclin 1 (Fragment) OS=Lingulodinium polyedrum GN=Cyc1 PE=2 SV=1	1	43.9	28	39	484	EMLYRHPA
26	tr|Q5SDR2|Q5SDR2_LINPO	Mitotic cyclin 1 (Fragment) OS=Lingulodinium polyedrum GN=Cyc1 PE=2 SV=1	1	43.9	28	39	484	VERCGSSEA
26	tr|Q5SDR2|Q5SDR2_LINPO	Mitotic cyclin 1 (Fragment) OS=Lingulodinium polyedrum GN=Cyc1 PE=2 SV=1	1	43.9	28	39	484	DQPQINAK
26	tr|Q5SDR2|Q5SDR2_LINPO	Mitotic cyclin 1 (Fragment) OS=Lingulodinium polyedrum GN=Cyc1 PE=2 SV=1	1	43.9	28	39	484	YRHTEMLY
26	tr|Q5SDR2|Q5SDR2_LINPO	Mitotic cyclin 1 (Fragment) OS=Lingulodinium polyedrum GN=Cyc1 PE=2 SV=1	1	43.9	28	39	484	PDHDPQLVK
26	tr|Q5SDR2|Q5SDR2_LINPO	Mitotic cyclin 1 (Fragment) OS=Lingulodinium polyedrum GN=Cyc1 PE=2 SV=1	1	43.9	28	39	484	AGCEVPR
26	tr|Q5SDR2|Q5SDR2_LINPO	Mitotic cyclin 1 (Fragment) OS=Lingulodinium polyedrum GN=Cyc1 PE=2 SV=1	1	43.9	28	39	484	QDAAAAGPAK
26	tr|Q5SDR2|Q5SDR2_LINPO	Mitotic cyclin 1 (Fragment) OS=Lingulodinium polyedrum GN=Cyc1 PE=2 SV=1	1	43.9	28	39	484	APSTAGAGC
26	tr|Q5SDR2|Q5SDR2_LINPO	Mitotic cyclin 1 (Fragment) OS=Lingulodinium polyedrum GN=Cyc1 PE=2 SV=1	1	43.9	28	39	484	RLSGYVEK
26	tr|Q5SDR2|Q5SDR2_LINPO	Mitotic cyclin 1 (Fragment) OS=Lingulodinium polyedrum GN=Cyc1 PE=2 SV=1	1	43.9	28	39	484	LSGGPPR
26	tr|Q5SDR2|Q5SDR2_LINPO	Mitotic cyclin 1 (Fragment) OS=Lingulodinium polyedrum GN=Cyc1 PE=2 SV=1	1	43.9	28	39	484	QAAAVAER
26	tr|Q5SDR2|Q5SDR2_LINPO	Mitotic cyclin 1 (Fragment) OS=Lingulodinium polyedrum GN=Cyc1 PE=2 SV=1	1	43.9	28	39	484	HTEM[147]LYRH
26	tr|Q5SDR2|Q5SDR2_LINPO	Mitotic cyclin 1 (Fragment) OS=Lingulodinium polyedrum GN=Cyc1 PE=2 SV=1	1	43.9	28	39	484	AAAAGPAK
27	tr|Q6TDT2|Q6TDT2_LINPO	Actin OS=Lingulodinium polyedrum PE=2 SV=1	1	78.7	50	94	383	AGDDAPR
27	tr|Q6TDT2|Q6TDT2_LINPO	Actin OS=Lingulodinium polyedrum PE=2 SV=1	1	78.7	50	94	383	DLTDYLM[147]K
27	tr|Q6TDT2|Q6TDT2_LINPO	Actin OS=Lingulodinium polyedrum PE=2 SV=1	1	78.7	50	94	383	GIM[147]VGM[147]DQK
27	tr|Q6TDT2|Q6TDT2_LINPO	Actin OS=Lingulodinium polyedrum PE=2 SV=1	1	78.7	50	94	383	VVAPPER
27	tr|Q6TDT2|Q6TDT2_LINPO	Actin OS=Lingulodinium polyedrum PE=2 SV=1	1	78.7	50	94	383	AGFAGDDAPR
27	tr|Q6TDT2|Q6TDT2_LINPO	Actin OS=Lingulodinium polyedrum PE=2 SV=1	1	78.7	50	94	383	FRCPEVLFQPSLVGK
27	tr|Q6TDT2|Q6TDT2_LINPO	Actin OS=Lingulodinium polyedrum PE=2 SV=1	1	78.7	50	94	383	LCYIALDYDSEM[147]K
27	tr|Q6TDT2|Q6TDT2_LINPO	Actin OS=Lingulodinium polyedrum PE=2 SV=1	1	78.7	50	94	383	TYELPDGNIITVGSER
27	tr|Q6TDT2|Q6TDT2_LINPO	Actin OS=Lingulodinium polyedrum PE=2 SV=1	1	78.7	50	94	383	VAPEEHPVLLTEAPLNPK
27	tr|Q6TDT2|Q6TDT2_LINPO	Actin OS=Lingulodinium polyedrum PE=2 SV=1	1	78.7	50	94	383	VVDNGSGM[147]CK
27	tr|Q6TDT2|Q6TDT2_LINPO	Actin OS=Lingulodinium polyedrum PE=2 SV=1	1	78.7	50	94	383	FRCPEVLFQPSLVGK
27	tr|Q6TDT2|Q6TDT2_LINPO	Actin OS=Lingulodinium polyedrum PE=2 SV=1	1	78.7	50	94	383	M[147]PGIM[147]VGM[147]DQKDSYIGDEAQSK
27	tr|Q6TDT2|Q6TDT2_LINPO	Actin OS=Lingulodinium polyedrum PE=2 SV=1	1	78.7	50	94	383	TEYDEAGPSIVHR
27	tr|Q6TDT2|Q6TDT2_LINPO	Actin OS=Lingulodinium polyedrum PE=2 SV=1	1	78.7	50	94	383	VAPEEHPVLLTEAPLNPK
27	tr|Q6TDT2|Q6TDT2_LINPO	Actin OS=Lingulodinium polyedrum PE=2 SV=1	1	78.7	50	94	383	ELTALAPSTMK
27	tr|Q6TDT2|Q6TDT2_LINPO	Actin OS=Lingulodinium polyedrum PE=2 SV=1	1	78.7	50	94	383	DSYIGDEAQSKR
27	tr|Q6TDT2|Q6TDT2_LINPO	Actin OS=Lingulodinium polyedrum PE=2 SV=1	1	78.7	50	94	383	ELTALAPSTM[147]K
27	tr|Q6TDT2|Q6TDT2_LINPO	Actin OS=Lingulodinium polyedrum PE=2 SV=1	1	78.7	50	94	383	GYSFTTTAER
27	tr|Q6TDT2|Q6TDT2_LINPO	Actin OS=Lingulodinium polyedrum PE=2 SV=1	1	78.7	50	94	383	DLTDYLM[147]K
27	tr|Q6TDT2|Q6TDT2_LINPO	Actin OS=Lingulodinium polyedrum PE=2 SV=1	1	78.7	50	94	383	LDLAGRDLTDYLMK
27	tr|Q6TDT2|Q6TDT2_LINPO	Actin OS=Lingulodinium polyedrum PE=2 SV=1	1	78.7	50	94	383	VVAPPERK
27	tr|Q6TDT2|Q6TDT2_LINPO	Actin OS=Lingulodinium polyedrum PE=2 SV=1	1	78.7	50	94	383	SFTTTAER
27	tr|Q6TDT2|Q6TDT2_LINPO	Actin OS=Lingulodinium polyedrum PE=2 SV=1	1	78.7	50	94	383	CDVDIRK
27	tr|Q6TDT2|Q6TDT2_LINPO	Actin OS=Lingulodinium polyedrum PE=2 SV=1	1	78.7	50	94	383	DSYIGDEAQSK
27	tr|Q6TDT2|Q6TDT2_LINPO	Actin OS=Lingulodinium polyedrum PE=2 SV=1	1	78.7	50	94	383	ITVGSER
27	tr|Q6TDT2|Q6TDT2_LINPO	Actin OS=Lingulodinium polyedrum PE=2 SV=1	1	78.7	50	94	383	DLTDYLMK
27	tr|Q6TDT2|Q6TDT2_LINPO	Actin OS=Lingulodinium polyedrum PE=2 SV=1	1	78.7	50	94	383	GVLTLKYPI
27	tr|Q6TDT2|Q6TDT2_LINPO	Actin OS=Lingulodinium polyedrum PE=2 SV=1	1	78.7	50	94	383	EKTYELPDG
27	tr|Q6TDT2|Q6TDT2_LINPO	Actin OS=Lingulodinium polyedrum PE=2 SV=1	1	78.7	50	94	383	LTEAPLNPK
27	tr|Q6TDT2|Q6TDT2_LINPO	Actin OS=Lingulodinium polyedrum PE=2 SV=1	1	78.7	50	94	383	IALDYDSEM[147]K
27	tr|Q6TDT2|Q6TDT2_LINPO	Actin OS=Lingulodinium polyedrum PE=2 SV=1	1	78.7	50	94	383	GDEEVAALVVDNGSGM[147]CK
27	tr|Q6TDT2|Q6TDT2_LINPO	Actin OS=Lingulodinium polyedrum PE=2 SV=1	1	78.7	50	94	383	LCYIALD
27	tr|Q6TDT2|Q6TDT2_LINPO	Actin OS=Lingulodinium polyedrum PE=2 SV=1	1	78.7	50	94	383	LDYDSEMK
27	tr|Q6TDT2|Q6TDT2_LINPO	Actin OS=Lingulodinium polyedrum PE=2 SV=1	1	78.7	50	94	383	GIM[147]VGM[147]DQK
27	tr|Q6TDT2|Q6TDT2_LINPO	Actin OS=Lingulodinium polyedrum PE=2 SV=1	1	78.7	50	94	383	SIM[147]KCDVDIR
27	tr|Q6TDT2|Q6TDT2_LINPO	Actin OS=Lingulodinium polyedrum PE=2 SV=1	1	78.7	50	94	383	AEREIVR
27	tr|Q6TDT2|Q6TDT2_LINPO	Actin OS=Lingulodinium polyedrum PE=2 SV=1	1	78.7	50	94	383	M[147]AKELTALAPSTM[147]KIK
28	tr|Q6TDT3|Q6TDT3_LINPO	Cell surface protein p43 OS=Lingulodinium polyedrum PE=2 SV=1	1	68.2	34	49	406	SLSGFSTKK
28	tr|Q6TDT3|Q6TDT3_LINPO	Cell surface protein p43 OS=Lingulodinium polyedrum PE=2 SV=1	1	68.2	34	49	406	TEAVASTR
28	tr|Q6TDT3|Q6TDT3_LINPO	Cell surface protein p43 OS=Lingulodinium polyedrum PE=2 SV=1	1	68.2	34	49	406	YGPM[147]GEDLFAQICM[147]EK
28	tr|Q6TDT3|Q6TDT3_LINPO	Cell surface protein p43 OS=Lingulodinium polyedrum PE=2 SV=1	1	68.2	34	49	406	ADADAVFFVDKLIPR
28	tr|Q6TDT3|Q6TDT3_LINPO	Cell surface protein p43 OS=Lingulodinium polyedrum PE=2 SV=1	1	68.2	34	49	406	TGPCTVLTDTLDFDSHER
28	tr|Q6TDT3|Q6TDT3_LINPO	Cell surface protein p43 OS=Lingulodinium polyedrum PE=2 SV=1	1	68.2	34	49	406	KSPTEAECKPYCPK
28	tr|Q6TDT3|Q6TDT3_LINPO	Cell surface protein p43 OS=Lingulodinium polyedrum PE=2 SV=1	1	68.2	34	49	406	TAFSILLANIETCKK
28	tr|Q6TDT3|Q6TDT3_LINPO	Cell surface protein p43 OS=Lingulodinium polyedrum PE=2 SV=1	1	68.2	34	49	406	SYDKELLSIAYSK
28	tr|Q6TDT3|Q6TDT3_LINPO	Cell surface protein p43 OS=Lingulodinium polyedrum PE=2 SV=1	1	68.2	34	49	406	SPTEAECKPYCPK
28	tr|Q6TDT3|Q6TDT3_LINPO	Cell surface protein p43 OS=Lingulodinium polyedrum PE=2 SV=1	1	68.2	34	49	406	KSYDKELLSIAYSK
28	tr|Q6TDT3|Q6TDT3_LINPO	Cell surface protein p43 OS=Lingulodinium polyedrum PE=2 SV=1	1	68.2	34	49	406	NGVAKEDAFDISSDGLCK
28	tr|Q6TDT3|Q6TDT3_LINPO	Cell surface protein p43 OS=Lingulodinium polyedrum PE=2 SV=1	1	68.2	34	49	406	KAWQAIK
28	tr|Q6TDT3|Q6TDT3_LINPO	Cell surface protein p43 OS=Lingulodinium polyedrum PE=2 SV=1	1	68.2	34	49	406	EAVASTR
28	tr|Q6TDT3|Q6TDT3_LINPO	Cell surface protein p43 OS=Lingulodinium polyedrum PE=2 SV=1	1	68.2	34	49	406	KLTGQYVN
28	tr|Q6TDT3|Q6TDT3_LINPO	Cell surface protein p43 OS=Lingulodinium polyedrum PE=2 SV=1	1	68.2	34	49	406	EAAAPLM
28	tr|Q6TDT3|Q6TDT3_LINPO	Cell surface protein p43 OS=Lingulodinium polyedrum PE=2 SV=1	1	68.2	34	49	406	IKLMPVP
29	tr|Q84U55|Q84U55_LINPO	Histone-like protein OS=Lingulodinium polyedrum PE=2 SV=1	1	86.5	17	26	106	FPVAALK
29	tr|Q84U55|Q84U55_LINPO	Histone-like protein OS=Lingulodinium polyedrum PE=2 SV=1	1	86.5	17	26	106	KAM[147]TKGAIA
29	tr|Q84U55|Q84U55_LINPO	Histone-like protein OS=Lingulodinium polyedrum PE=2 SV=1	1	86.5	17	26	106	LINSLAEIATK
29	tr|Q84U55|Q84U55_LINPO	Histone-like protein OS=Lingulodinium polyedrum PE=2 SV=1	1	86.5	17	26	106	TKPATKA
29	tr|Q84U55|Q84U55_LINPO	Histone-like protein OS=Lingulodinium polyedrum PE=2 SV=1	1	86.5	17	26	106	AM[147]TKGAIAD
29	tr|Q84U55|Q84U55_LINPO	Histone-like protein OS=Lingulodinium polyedrum PE=2 SV=1	1	86.5	17	26	106	AALKKSI
29	tr|Q84U55|Q84U55_LINPO	Histone-like protein OS=Lingulodinium polyedrum PE=2 SV=1	1	86.5	17	26	106	TRTKPATKAG
29	tr|Q84U55|Q84U55_LINPO	Histone-like protein OS=Lingulodinium polyedrum PE=2 SV=1	1	86.5	17	26	106	EIATKEVK
29	tr|Q84U55|Q84U55_LINPO	Histone-like protein OS=Lingulodinium polyedrum PE=2 SV=1	1	86.5	17	26	106	MAPM[147]KAAAK
29	tr|Q84U55|Q84U55_LINPO	Histone-like protein OS=Lingulodinium polyedrum PE=2 SV=1	1	86.5	17	26	106	PATKAGK
30	tr|Q9ARD8|Q9ARD8_LINPO	Delta-aminolevulinic acid dehydratase (Fragment) OS=Lingulodinium polyedrum GN=hemB PE=2 SV=1	1	60	22	35	275	QAVSQAEAGA
30	tr|Q9ARD8|Q9ARD8_LINPO	Delta-aminolevulinic acid dehydratase (Fragment) OS=Lingulodinium polyedrum GN=hemB PE=2 SV=1	1	60	22	35	275	QAVSQAEAG
30	tr|Q9ARD8|Q9ARD8_LINPO	Delta-aminolevulinic acid dehydratase (Fragment) OS=Lingulodinium polyedrum GN=hemB PE=2 SV=1	1	60	22	35	275	PYLDVIK
30	tr|Q9ARD8|Q9ARD8_LINPO	Delta-aminolevulinic acid dehydratase (Fragment) OS=Lingulodinium polyedrum GN=hemB PE=2 SV=1	1	60	22	35	275	PKTPDELK
30	tr|Q9ARD8|Q9ARD8_LINPO	Delta-aminolevulinic acid dehydratase (Fragment) OS=Lingulodinium polyedrum GN=hemB PE=2 SV=1	1	60	22	35	275	GRVGAIR
30	tr|Q9ARD8|Q9ARD8_LINPO	Delta-aminolevulinic acid dehydratase (Fragment) OS=Lingulodinium polyedrum GN=hemB PE=2 SV=1	1	60	22	35	275	EALLEAK
31	tr|Q9AXR7|Q9AXR7_LINPO	Superoxide dismutase OS=Lingulodinium polyedrum GN=fesod1 PE=2 SV=1	1	44.3	13	20	234	YVQSFWGA
31	tr|Q9AXR7|Q9AXR7_LINPO	Superoxide dismutase OS=Lingulodinium polyedrum GN=fesod1 PE=2 SV=1	1	44.3	13	20	234	NFPQGELR
31	tr|Q9AXR7|Q9AXR7_LINPO	Superoxide dismutase OS=Lingulodinium polyedrum GN=fesod1 PE=2 SV=1	1	44.3	13	20	234	AGLFNNAAQ
31	tr|Q9AXR7|Q9AXR7_LINPO	Superoxide dismutase OS=Lingulodinium polyedrum GN=fesod1 PE=2 SV=1	1	44.3	13	20	234	AKYVQSFWG
31	tr|Q9AXR7|Q9AXR7_LINPO	Superoxide dismutase OS=Lingulodinium polyedrum GN=fesod1 PE=2 SV=1	1	44.3	13	20	234	KAAASNASK
31	tr|Q9AXR7|Q9AXR7_LINPO	Superoxide dismutase OS=Lingulodinium polyedrum GN=fesod1 PE=2 SV=1	1	44.3	13	20	234	MFAAAVSP
31	tr|Q9AXR7|Q9AXR7_LINPO	Superoxide dismutase OS=Lingulodinium polyedrum GN=fesod1 PE=2 SV=1	1	44.3	13	20	234	LIEGTDLAN
32	tr|X2D8N9|X2D8N9_LINPO	Class II fructose-1,6-bisphosphate aldolase OS=Lingulodinium polyedrum GN=FBA-II PE=2 SV=1	1	59.8	39	77	476	PGVVTGK
32	tr|X2D8N9|X2D8N9_LINPO	Class II fructose-1,6-bisphosphate aldolase OS=Lingulodinium polyedrum GN=FBA-II PE=2 SV=1	1	59.8	39	77	476	VGSLAVVGA
32	tr|X2D8N9|X2D8N9_LINPO	Class II fructose-1,6-bisphosphate aldolase OS=Lingulodinium polyedrum GN=FBA-II PE=2 SV=1	1	59.8	39	77	476	AGGPIMVTFSR
32	tr|X2D8N9|X2D8N9_LINPO	Class II fructose-1,6-bisphosphate aldolase OS=Lingulodinium polyedrum GN=FBA-II PE=2 SV=1	1	59.8	39	77	476	AGGPIM[147]VTFSR
32	tr|X2D8N9|X2D8N9_LINPO	Class II fructose-1,6-bisphosphate aldolase OS=Lingulodinium polyedrum GN=FBA-II PE=2 SV=1	1	59.8	39	77	476	ALVDLLNYAK
32	tr|X2D8N9|X2D8N9_LINPO	Class II fructose-1,6-bisphosphate aldolase OS=Lingulodinium polyedrum GN=FBA-II PE=2 SV=1	1	59.8	39	77	476	AM[147]QDLNCVDRL
32	tr|X2D8N9|X2D8N9_LINPO	Class II fructose-1,6-bisphosphate aldolase OS=Lingulodinium polyedrum GN=FBA-II PE=2 SV=1	1	59.8	39	77	476	ANEDYYAK
32	tr|X2D8N9|X2D8N9_LINPO	Class II fructose-1,6-bisphosphate aldolase OS=Lingulodinium polyedrum GN=FBA-II PE=2 SV=1	1	59.8	39	77	476	M[147]PASVKPGVVTGK
32	tr|X2D8N9|X2D8N9_LINPO	Class II fructose-1,6-bisphosphate aldolase OS=Lingulodinium polyedrum GN=FBA-II PE=2 SV=1	1	59.8	39	77	476	TVAELYGVPVILHTDHCQK
32	tr|X2D8N9|X2D8N9_LINPO	Class II fructose-1,6-bisphosphate aldolase OS=Lingulodinium polyedrum GN=FBA-II PE=2 SV=1	1	59.8	39	77	476	M[147]PASVKPGVVTGK
32	tr|X2D8N9|X2D8N9_LINPO	Class II fructose-1,6-bisphosphate aldolase OS=Lingulodinium polyedrum GN=FBA-II PE=2 SV=1	1	59.8	39	77	476	GGGQFITGK
32	tr|X2D8N9|X2D8N9_LINPO	Class II fructose-1,6-bisphosphate aldolase OS=Lingulodinium polyedrum GN=FBA-II PE=2 SV=1	1	59.8	39	77	476	AGEVSMADR
32	tr|X2D8N9|X2D8N9_LINPO	Class II fructose-1,6-bisphosphate aldolase OS=Lingulodinium polyedrum GN=FBA-II PE=2 SV=1	1	59.8	39	77	476	NEDYYAK
32	tr|X2D8N9|X2D8N9_LINPO	Class II fructose-1,6-bisphosphate aldolase OS=Lingulodinium polyedrum GN=FBA-II PE=2 SV=1	1	59.8	39	77	476	AGEVSMA
32	tr|X2D8N9|X2D8N9_LINPO	Class II fructose-1,6-bisphosphate aldolase OS=Lingulodinium polyedrum GN=FBA-II PE=2 SV=1	1	59.8	39	77	476	VGSLAVVGAGA
32	tr|X2D8N9|X2D8N9_LINPO	Class II fructose-1,6-bisphosphate aldolase OS=Lingulodinium polyedrum GN=FBA-II PE=2 SV=1	1	59.8	39	77	476	AFVAPAT
32	tr|X2D8N9|X2D8N9_LINPO	Class II fructose-1,6-bisphosphate aldolase OS=Lingulodinium polyedrum GN=FBA-II PE=2 SV=1	1	59.8	39	77	476	MPASVKPGVVTGK
32	tr|X2D8N9|X2D8N9_LINPO	Class II fructose-1,6-bisphosphate aldolase OS=Lingulodinium polyedrum GN=FBA-II PE=2 SV=1	1	59.8	39	77	476	NEYQKKNK
32	tr|X2D8N9|X2D8N9_LINPO	Class II fructose-1,6-bisphosphate aldolase OS=Lingulodinium polyedrum GN=FBA-II PE=2 SV=1	1	59.8	39	77	476	MSLRAGE
32	tr|X2D8N9|X2D8N9_LINPO	Class II fructose-1,6-bisphosphate aldolase OS=Lingulodinium polyedrum GN=FBA-II PE=2 SV=1	1	59.8	39	77	476	AGVIKM[147]N
32	tr|X2D8N9|X2D8N9_LINPO	Class II fructose-1,6-bisphosphate aldolase OS=Lingulodinium polyedrum GN=FBA-II PE=2 SV=1	1	59.8	39	77	476	EKTAFAK
32	tr|X2D8N9|X2D8N9_LINPO	Class II fructose-1,6-bisphosphate aldolase OS=Lingulodinium polyedrum GN=FBA-II PE=2 SV=1	1	59.8	39	77	476	AGACGAGAALR
32	tr|X2D8N9|X2D8N9_LINPO	Class II fructose-1,6-bisphosphate aldolase OS=Lingulodinium polyedrum GN=FBA-II PE=2 SV=1	1	59.8	39	77	476	EVSMADR
32	tr|X2D8N9|X2D8N9_LINPO	Class II fructose-1,6-bisphosphate aldolase OS=Lingulodinium polyedrum GN=FBA-II PE=2 SV=1	1	59.8	39	77	476	KPGVVTGK
32	tr|X2D8N9|X2D8N9_LINPO	Class II fructose-1,6-bisphosphate aldolase OS=Lingulodinium polyedrum GN=FBA-II PE=2 SV=1	1	59.8	39	77	476	MPASVKP
32	tr|X2D8N9|X2D8N9_LINPO	Class II fructose-1,6-bisphosphate aldolase OS=Lingulodinium polyedrum GN=FBA-II PE=2 SV=1	1	59.8	39	77	476	KAGGPIMVTFSR
32	tr|X2D8N9|X2D8N9_LINPO	Class II fructose-1,6-bisphosphate aldolase OS=Lingulodinium polyedrum GN=FBA-II PE=2 SV=1	1	59.8	39	77	476	AGEVSM[147]A
32	tr|X2D8N9|X2D8N9_LINPO	Class II fructose-1,6-bisphosphate aldolase OS=Lingulodinium polyedrum GN=FBA-II PE=2 SV=1	1	59.8	39	77	476	MADRLVK
33	tr|X2D9V1|X2D9V1_LINPO	Class II fructose-1,6-bisphosphate aldolase OS=Lingulodinium polyedrum GN=FBA-II PE=2 SV=1	1	59.5	43	79	475	AAVGAAQAGK
33	tr|X2D9V1|X2D9V1_LINPO	Class II fructose-1,6-bisphosphate aldolase OS=Lingulodinium polyedrum GN=FBA-II PE=2 SV=1	1	59.5	43	79	475	PGVVTGK
33	tr|X2D9V1|X2D9V1_LINPO	Class II fructose-1,6-bisphosphate aldolase OS=Lingulodinium polyedrum GN=FBA-II PE=2 SV=1	1	59.5	43	79	475	AGGPIMVTFSR
33	tr|X2D9V1|X2D9V1_LINPO	Class II fructose-1,6-bisphosphate aldolase OS=Lingulodinium polyedrum GN=FBA-II PE=2 SV=1	1	59.5	43	79	475	AGGPIM[147]VTFSR
33	tr|X2D9V1|X2D9V1_LINPO	Class II fructose-1,6-bisphosphate aldolase OS=Lingulodinium polyedrum GN=FBA-II PE=2 SV=1	1	59.5	43	79	475	ALVDLLNYAK
33	tr|X2D9V1|X2D9V1_LINPO	Class II fructose-1,6-bisphosphate aldolase OS=Lingulodinium polyedrum GN=FBA-II PE=2 SV=1	1	59.5	43	79	475	AM[147]QDLNCVDRL
33	tr|X2D9V1|X2D9V1_LINPO	Class II fructose-1,6-bisphosphate aldolase OS=Lingulodinium polyedrum GN=FBA-II PE=2 SV=1	1	59.5	43	79	475	ANEDYYAK
33	tr|X2D9V1|X2D9V1_LINPO	Class II fructose-1,6-bisphosphate aldolase OS=Lingulodinium polyedrum GN=FBA-II PE=2 SV=1	1	59.5	43	79	475	M[147]PASVKPGVVTGK
33	tr|X2D9V1|X2D9V1_LINPO	Class II fructose-1,6-bisphosphate aldolase OS=Lingulodinium polyedrum GN=FBA-II PE=2 SV=1	1	59.5	43	79	475	TVAELYGVPVILHTDHCQK
33	tr|X2D9V1|X2D9V1_LINPO	Class II fructose-1,6-bisphosphate aldolase OS=Lingulodinium polyedrum GN=FBA-II PE=2 SV=1	1	59.5	43	79	475	M[147]PASVKPGVVTGK
33	tr|X2D9V1|X2D9V1_LINPO	Class II fructose-1,6-bisphosphate aldolase OS=Lingulodinium polyedrum GN=FBA-II PE=2 SV=1	1	59.5	43	79	475	GGGQFITGK
33	tr|X2D9V1|X2D9V1_LINPO	Class II fructose-1,6-bisphosphate aldolase OS=Lingulodinium polyedrum GN=FBA-II PE=2 SV=1	1	59.5	43	79	475	AGEVSMADR
33	tr|X2D9V1|X2D9V1_LINPO	Class II fructose-1,6-bisphosphate aldolase OS=Lingulodinium polyedrum GN=FBA-II PE=2 SV=1	1	59.5	43	79	475	NEDYYAK
33	tr|X2D9V1|X2D9V1_LINPO	Class II fructose-1,6-bisphosphate aldolase OS=Lingulodinium polyedrum GN=FBA-II PE=2 SV=1	1	59.5	43	79	475	AGEVSMA
33	tr|X2D9V1|X2D9V1_LINPO	Class II fructose-1,6-bisphosphate aldolase OS=Lingulodinium polyedrum GN=FBA-II PE=2 SV=1	1	59.5	43	79	475	AFVAPAAGGAA
33	tr|X2D9V1|X2D9V1_LINPO	Class II fructose-1,6-bisphosphate aldolase OS=Lingulodinium polyedrum GN=FBA-II PE=2 SV=1	1	59.5	43	79	475	MPASVKPGVVTGK
33	tr|X2D9V1|X2D9V1_LINPO	Class II fructose-1,6-bisphosphate aldolase OS=Lingulodinium polyedrum GN=FBA-II PE=2 SV=1	1	59.5	43	79	475	NEYQKKNK
33	tr|X2D9V1|X2D9V1_LINPO	Class II fructose-1,6-bisphosphate aldolase OS=Lingulodinium polyedrum GN=FBA-II PE=2 SV=1	1	59.5	43	79	475	MSLRAGE
33	tr|X2D9V1|X2D9V1_LINPO	Class II fructose-1,6-bisphosphate aldolase OS=Lingulodinium polyedrum GN=FBA-II PE=2 SV=1	1	59.5	43	79	475	AGVIKM[147]N
33	tr|X2D9V1|X2D9V1_LINPO	Class II fructose-1,6-bisphosphate aldolase OS=Lingulodinium polyedrum GN=FBA-II PE=2 SV=1	1	59.5	43	79	475	AGACGAGAALR
33	tr|X2D9V1|X2D9V1_LINPO	Class II fructose-1,6-bisphosphate aldolase OS=Lingulodinium polyedrum GN=FBA-II PE=2 SV=1	1	59.5	43	79	475	EVSMADR
33	tr|X2D9V1|X2D9V1_LINPO	Class II fructose-1,6-bisphosphate aldolase OS=Lingulodinium polyedrum GN=FBA-II PE=2 SV=1	1	59.5	43	79	475	KPGVVTGK
33	tr|X2D9V1|X2D9V1_LINPO	Class II fructose-1,6-bisphosphate aldolase OS=Lingulodinium polyedrum GN=FBA-II PE=2 SV=1	1	59.5	43	79	475	MPASVKP
33	tr|X2D9V1|X2D9V1_LINPO	Class II fructose-1,6-bisphosphate aldolase OS=Lingulodinium polyedrum GN=FBA-II PE=2 SV=1	1	59.5	43	79	475	TATMEKK
33	tr|X2D9V1|X2D9V1_LINPO	Class II fructose-1,6-bisphosphate aldolase OS=Lingulodinium polyedrum GN=FBA-II PE=2 SV=1	1	59.5	43	79	475	KAGGPIMVTFSR
33	tr|X2D9V1|X2D9V1_LINPO	Class II fructose-1,6-bisphosphate aldolase OS=Lingulodinium polyedrum GN=FBA-II PE=2 SV=1	1	59.5	43	79	475	AGEVSM[147]A
33	tr|X2D9V1|X2D9V1_LINPO	Class II fructose-1,6-bisphosphate aldolase OS=Lingulodinium polyedrum GN=FBA-II PE=2 SV=1	1	59.5	43	79	475	MADRLVK
34a	sp|O77206|LUCIF_LINPO	Dinoflagellate luciferase OS=Lingulodinium polyedrum PE=1 SV=1	1	48	54	85	1262	GAAEAKK
34a	sp|O77206|LUCIF_LINPO	Dinoflagellate luciferase OS=Lingulodinium polyedrum PE=1 SV=1	1	48	54	85	1262	MAAQLEQ
34a	sp|O77206|LUCIF_LINPO	Dinoflagellate luciferase OS=Lingulodinium polyedrum PE=1 SV=1	1	48	54	85	1262	DYENGVR
34a	sp|O77206|LUCIF_LINPO	Dinoflagellate luciferase OS=Lingulodinium polyedrum PE=1 SV=1	1	48	54	85	1262	AVTYM[147]LK
34a	sp|O77206|LUCIF_LINPO	Dinoflagellate luciferase OS=Lingulodinium polyedrum PE=1 SV=1	1	48	54	85	1262	IGFFWEME
34a	sp|O77206|LUCIF_LINPO	Dinoflagellate luciferase OS=Lingulodinium polyedrum PE=1 SV=1	1	48	54	85	1262	EAIKSGMLGAA
34a	sp|O77206|LUCIF_LINPO	Dinoflagellate luciferase OS=Lingulodinium polyedrum PE=1 SV=1	1	48	54	85	1262	EAIKAGM
34a	sp|O77206|LUCIF_LINPO	Dinoflagellate luciferase OS=Lingulodinium polyedrum PE=1 SV=1	1	48	54	85	1262	KGAMLDQR
34a	sp|O77206|LUCIF_LINPO	Dinoflagellate luciferase OS=Lingulodinium polyedrum PE=1 SV=1	1	48	54	85	1262	LLEAHELGGK
34a	sp|O77206|LUCIF_LINPO	Dinoflagellate luciferase OS=Lingulodinium polyedrum PE=1 SV=1	1	48	54	85	1262	EAIKAGMLGAA
34a	sp|O77206|LUCIF_LINPO	Dinoflagellate luciferase OS=Lingulodinium polyedrum PE=1 SV=1	1	48	54	85	1262	GGLHRPKFDSE
34a	sp|O77206|LUCIF_LINPO	Dinoflagellate luciferase OS=Lingulodinium polyedrum PE=1 SV=1	1	48	54	85	1262	AGMLGAAE
34a	sp|O77206|LUCIF_LINPO	Dinoflagellate luciferase OS=Lingulodinium polyedrum PE=1 SV=1	1	48	54	85	1262	SGM[147]LGAAE
34a	sp|O77206|LUCIF_LINPO	Dinoflagellate luciferase OS=Lingulodinium polyedrum PE=1 SV=1	1	48	54	85	1262	DPCPQLTK
34a	sp|O77206|LUCIF_LINPO	Dinoflagellate luciferase OS=Lingulodinium polyedrum PE=1 SV=1	1	48	54	85	1262	GWLDTNK
34a	sp|O77206|LUCIF_LINPO	Dinoflagellate luciferase OS=Lingulodinium polyedrum PE=1 SV=1	1	48	54	85	1262	DNAPTNL
34a	sp|O77206|LUCIF_LINPO	Dinoflagellate luciferase OS=Lingulodinium polyedrum PE=1 SV=1	1	48	54	85	1262	AVTYMLKGL
34a	sp|O77206|LUCIF_LINPO	Dinoflagellate luciferase OS=Lingulodinium polyedrum PE=1 SV=1	1	48	54	85	1262	WITVSGGQAAF
34b	tr|B3SGE1|B3SGE1_LINPO	Luciferase (Fragment) OS=Lingulodinium polyedrum PE=4 SV=1	0		5	6	166	LLEAHELGGK
34b	tr|B3SGE1|B3SGE1_LINPO	Luciferase (Fragment) OS=Lingulodinium polyedrum PE=4 SV=1	0		5	6	166	GGLHRPKFDSE
35a	tr|F6K4X5|F6K4X5_LINPO	Cytochrome c oxidase subunit 1 (Fragment) OS=Lingulodinium polyedrum GN=COX1 PE=3 SV=1	1	24.8	11	17	492	EVETVELTT
35a	tr|F6K4X5|F6K4X5_LINPO	Cytochrome c oxidase subunit 1 (Fragment) OS=Lingulodinium polyedrum GN=COX1 PE=3 SV=1	1	24.8	11	17	492	TLDQTWAK
35a	tr|F6K4X5|F6K4X5_LINPO	Cytochrome c oxidase subunit 1 (Fragment) OS=Lingulodinium polyedrum GN=COX1 PE=3 SV=1	1	24.8	11	17	492	WAPAILW
35a	tr|F6K4X5|F6K4X5_LINPO	Cytochrome c oxidase subunit 1 (Fragment) OS=Lingulodinium polyedrum GN=COX1 PE=3 SV=1	1	24.8	11	17	492	GTALSLLIR
35a	tr|F6K4X5|F6K4X5_LINPO	Cytochrome c oxidase subunit 1 (Fragment) OS=Lingulodinium polyedrum GN=COX1 PE=3 SV=1	1	24.8	11	17	492	REVETVELTTTNLEWLHGCPPPY
35b	tr|F6K4W5|F6K4W5_LINPO	Cytochrome c oxidase subunit 1 (Fragment) OS=Lingulodinium polyedrum GN=COX1 PE=3 SV=1	0.9393	20.3	9	14	492	TLDQTWAK
35b	tr|F6K4W5|F6K4W5_LINPO	Cytochrome c oxidase subunit 1 (Fragment) OS=Lingulodinium polyedrum GN=COX1 PE=3 SV=1	0.9393	20.3	9	14	492	WAPAILW
35b	tr|F6K4W5|F6K4W5_LINPO	Cytochrome c oxidase subunit 1 (Fragment) OS=Lingulodinium polyedrum GN=COX1 PE=3 SV=1	0.9393	20.3	9	14	492	GTALSLLIR
36a	tr|Q2I6P1|Q2I6P1_LINPO	Pphotosystem I chain B (Fragment) OS=Lingulodinium polyedrum GN=psaB PE=2 SV=1	1	31.1	19	28	687	SQLM[147]PDK
36a	tr|Q2I6P1|Q2I6P1_LINPO	Pphotosystem I chain B (Fragment) OS=Lingulodinium polyedrum GN=psaB PE=2 SV=1	1	31.1	19	28	687	KGSLDAR
36a	tr|Q2I6P1|Q2I6P1_LINPO	Pphotosystem I chain B (Fragment) OS=Lingulodinium polyedrum GN=psaB PE=2 SV=1	1	31.1	19	28	687	GSQLMPDKI
36a	tr|Q2I6P1|Q2I6P1_LINPO	Pphotosystem I chain B (Fragment) OS=Lingulodinium polyedrum GN=psaB PE=2 SV=1	1	31.1	19	28	687	ASFVIGSTS
36b	tr|Q2I6P2|Q2I6P2_LINPO	Photosystem 1 chain B (Fragment) OS=Lingulodinium polyedrum GN=psaB PE=2 SV=1	0		11	16	234	SQLM[147]PDK
36b	tr|Q2I6P2|Q2I6P2_LINPO	Photosystem 1 chain B (Fragment) OS=Lingulodinium polyedrum GN=psaB PE=2 SV=1	0		11	16	234	KGSLDAR
36b	tr|Q2I6P2|Q2I6P2_LINPO	Photosystem 1 chain B (Fragment) OS=Lingulodinium polyedrum GN=psaB PE=2 SV=1	0		11	16	234	GSQLMPDKI
36b	tr|Q2I6P2|Q2I6P2_LINPO	Photosystem 1 chain B (Fragment) OS=Lingulodinium polyedrum GN=psaB PE=2 SV=1	0		11	16	234	ASFVIGSTS
37a	tr|Q2I6P7|Q2I6P7_LINPO	Photosystem II CP43 reaction center protein OS=Lingulodinium polyedrum GN=psbC PE=2 SV=1	1	30.4	15	22	468	IIFGGETM[147]R
37a	tr|Q2I6P7|Q2I6P7_LINPO	Photosystem II CP43 reaction center protein OS=Lingulodinium polyedrum GN=psbC PE=2 SV=1	1	30.4	15	22	468	SPTGEIIFGGETM[147]R
37a	tr|Q2I6P7|Q2I6P7_LINPO	Photosystem II CP43 reaction center protein OS=Lingulodinium polyedrum GN=psbC PE=2 SV=1	1	30.4	15	22	468	VAGTQGPTALGK
37a	tr|Q2I6P7|Q2I6P7_LINPO	Photosystem II CP43 reaction center protein OS=Lingulodinium polyedrum GN=psbC PE=2 SV=1	1	30.4	15	22	468	SSALSSER
37a	tr|Q2I6P7|Q2I6P7_LINPO	Photosystem II CP43 reaction center protein OS=Lingulodinium polyedrum GN=psbC PE=2 SV=1	1	30.4	15	22	468	GGGDVRVIK
37a	tr|Q2I6P7|Q2I6P7_LINPO	Photosystem II CP43 reaction center protein OS=Lingulodinium polyedrum GN=psbC PE=2 SV=1	1	30.4	15	22	468	LGVKVAG
37b	tr|Q5DWU0|Q5DWU0_LINPO	Photosystem II CP43 protein (Fragment) OS=Lingulodinium polyedrum GN=psbC PE=2 SV=1	0		13	20	360	IIFGGETM[147]R
37b	tr|Q5DWU0|Q5DWU0_LINPO	Photosystem II CP43 protein (Fragment) OS=Lingulodinium polyedrum GN=psbC PE=2 SV=1	0		13	20	360	SPTGEIIFGGETM[147]R
37b	tr|Q5DWU0|Q5DWU0_LINPO	Photosystem II CP43 protein (Fragment) OS=Lingulodinium polyedrum GN=psbC PE=2 SV=1	0		13	20	360	VAGTQGPTALGK
37b	tr|Q5DWU0|Q5DWU0_LINPO	Photosystem II CP43 protein (Fragment) OS=Lingulodinium polyedrum GN=psbC PE=2 SV=1	0		13	20	360	GGGDVRVIK
37b	tr|Q5DWU0|Q5DWU0_LINPO	Photosystem II CP43 protein (Fragment) OS=Lingulodinium polyedrum GN=psbC PE=2 SV=1	0		13	20	360	LGVKVAG
38a	tr|Q2I6P9|Q2I6P9_LINPO	Photosystem II protein D1 OS=Lingulodinium polyedrum GN=psbA PE=2 SV=1	1	14.5	17	47	351	ADLGMEVMHER
38a	tr|Q2I6P9|Q2I6P9_LINPO	Photosystem II protein D1 OS=Lingulodinium polyedrum GN=psbA PE=2 SV=1	1	14.5	17	47	351	ADLGM[147]EVM[147]HER
38a	tr|Q2I6P9|Q2I6P9_LINPO	Photosystem II protein D1 OS=Lingulodinium polyedrum GN=psbA PE=2 SV=1	1	14.5	17	47	351	LIFQYASFNNSR
38a	tr|Q2I6P9|Q2I6P9_LINPO	Photosystem II protein D1 OS=Lingulodinium polyedrum GN=psbA PE=2 SV=1	1	14.5	17	47	351	ADLGMEVMHER
38a	tr|Q2I6P9|Q2I6P9_LINPO	Photosystem II protein D1 OS=Lingulodinium polyedrum GN=psbA PE=2 SV=1	1	14.5	17	47	351	ADLGM[147]EVM[147]HER
38a	tr|Q2I6P9|Q2I6P9_LINPO	Photosystem II protein D1 OS=Lingulodinium polyedrum GN=psbA PE=2 SV=1	1	14.5	17	47	351	NAHNFPLDLA
38a	tr|Q2I6P9|Q2I6P9_LINPO	Photosystem II protein D1 OS=Lingulodinium polyedrum GN=psbA PE=2 SV=1	1	14.5	17	47	351	DLGM[147]EVM[147]HER
38a	tr|Q2I6P9|Q2I6P9_LINPO	Photosystem II protein D1 OS=Lingulodinium polyedrum GN=psbA PE=2 SV=1	1	14.5	17	47	351	EWEFSFR
38a	tr|Q2I6P9|Q2I6P9_LINPO	Photosystem II protein D1 OS=Lingulodinium polyedrum GN=psbA PE=2 SV=1	1	14.5	17	47	351	EPVAGSL
38a	tr|Q2I6P9|Q2I6P9_LINPO	Photosystem II protein D1 OS=Lingulodinium polyedrum GN=psbA PE=2 SV=1	1	14.5	17	47	351	EPVAGSLL
38a	tr|Q2I6P9|Q2I6P9_LINPO	Photosystem II protein D1 OS=Lingulodinium polyedrum GN=psbA PE=2 SV=1	1	14.5	17	47	351	EPVAGSLLY
38a	tr|Q2I6P9|Q2I6P9_LINPO	Photosystem II protein D1 OS=Lingulodinium polyedrum GN=psbA PE=2 SV=1	1	14.5	17	47	351	LGM[147]EVM[147]HER
38b	tr|Q9TM70|Q9TM70_LINPO	Photosystem II protein D1 OS=Lingulodinium polyedrum GN=psbA PE=3 SV=1	0		8	18	351	LIFQYASFNNSR
38b	tr|Q9TM70|Q9TM70_LINPO	Photosystem II protein D1 OS=Lingulodinium polyedrum GN=psbA PE=3 SV=1	0		8	18	351	NAHNFPLDLA
38b	tr|Q9TM70|Q9TM70_LINPO	Photosystem II protein D1 OS=Lingulodinium polyedrum GN=psbA PE=3 SV=1	0		8	18	351	EWEFSFR
38b	tr|Q9TM70|Q9TM70_LINPO	Photosystem II protein D1 OS=Lingulodinium polyedrum GN=psbA PE=3 SV=1	0		8	18	351	EPVAGSL
38b	tr|Q9TM70|Q9TM70_LINPO	Photosystem II protein D1 OS=Lingulodinium polyedrum GN=psbA PE=3 SV=1	0		8	18	351	EPVAGSLL
38b	tr|Q9TM70|Q9TM70_LINPO	Photosystem II protein D1 OS=Lingulodinium polyedrum GN=psbA PE=3 SV=1	0		8	18	351	EPVAGSLLY
39	tr|Q39913|Q39913_LINPO	Luciferin-binding protein OS=Lingulodinium polyedrum PE=4 SV=1	0.9999	60.6	8	11	680	AIQASIK
39	tr|Q39913|Q39913_LINPO	Luciferin-binding protein OS=Lingulodinium polyedrum PE=4 SV=1	0.9999	60.6	8	11	680	DIERVVALR
39	tr|Q39913|Q39913_LINPO	Luciferin-binding protein OS=Lingulodinium polyedrum PE=4 SV=1	0.9999	60.6	8	11	680	GAAPAPSTK
39	tr|Q39913|Q39913_LINPO	Luciferin-binding protein OS=Lingulodinium polyedrum PE=4 SV=1	0.9999	60.6	8	11	680	KLVNGVE
39	tr|Q39913|Q39913_LINPO	Luciferin-binding protein OS=Lingulodinium polyedrum PE=4 SV=1	0.9999	60.6	8	11	680	RDMPGYM[147]QR
39	tr|Q39913|Q39913_LINPO	Luciferin-binding protein OS=Lingulodinium polyedrum PE=4 SV=1	0.9999	60.6	8	11	680	THPLQIE
39	tr|Q39913|Q39913_LINPO	Luciferin-binding protein OS=Lingulodinium polyedrum PE=4 SV=1	0.9999	60.6	8	11	680	TVTDNVR
39	tr|Q39913|Q39913_LINPO	Luciferin-binding protein OS=Lingulodinium polyedrum PE=4 SV=1	0.9999	60.6	8	11	680	DRPSGFLA
39	tr|Q39913|Q39913_LINPO	Luciferin-binding protein OS=Lingulodinium polyedrum PE=4 SV=1	0.9999	60.6	8	11	680	KM[147]TLKATG
39	tr|Q39913|Q39913_LINPO	Luciferin-binding protein OS=Lingulodinium polyedrum PE=4 SV=1	0.9999	60.6	8	11	680	EPVEKM[147]IR
39	tr|Q39913|Q39913_LINPO	Luciferin-binding protein OS=Lingulodinium polyedrum PE=4 SV=1	0.9999	60.6	8	11	680	NPAESGL
39	tr|Q39913|Q39913_LINPO	Luciferin-binding protein OS=Lingulodinium polyedrum PE=4 SV=1	0.9999	60.6	8	11	680	QPSNVER
39	tr|Q39913|Q39913_LINPO	Luciferin-binding protein OS=Lingulodinium polyedrum PE=4 SV=1	0.9999	60.6	8	11	680	FLANEGK
39	tr|Q39913|Q39913_LINPO	Luciferin-binding protein OS=Lingulodinium polyedrum PE=4 SV=1	0.9999	60.6	8	11	680	SM[147]VVKATN
40	tr|Q56VM5|Q56VM5_LINPO	Cytochrome b (Fragment) OS=Lingulodinium polyedrum PE=3 SV=1	0.9995	10.7	2	4	209	YNPTLKR
41	tr|O96365|O96365_LINPO	Glyceraldehyde-3-phosphate dehydrogenase (Fragment) OS=Lingulodinium polyedrum GN=GAPDH PE=2 SV=1	0.9986	73	7	10	426	EICAEIKR
41	tr|O96365|O96365_LINPO	Glyceraldehyde-3-phosphate dehydrogenase (Fragment) OS=Lingulodinium polyedrum GN=GAPDH PE=2 SV=1	0.9986	73	7	10	426	LRGVTSESA
41	tr|O96365|O96365_LINPO	Glyceraldehyde-3-phosphate dehydrogenase (Fragment) OS=Lingulodinium polyedrum GN=GAPDH PE=2 SV=1	0.9986	73	7	10	426	PSSTGAAK
41	tr|O96365|O96365_LINPO	Glyceraldehyde-3-phosphate dehydrogenase (Fragment) OS=Lingulodinium polyedrum GN=GAPDH PE=2 SV=1	0.9986	73	7	10	426	ATGIAINGFGR
41	tr|O96365|O96365_LINPO	Glyceraldehyde-3-phosphate dehydrogenase (Fragment) OS=Lingulodinium polyedrum GN=GAPDH PE=2 SV=1	0.9986	73	7	10	426	LVM[147]WYDNEWGYSCR
41	tr|O96365|O96365_LINPO	Glyceraldehyde-3-phosphate dehydrogenase (Fragment) OS=Lingulodinium polyedrum GN=GAPDH PE=2 SV=1	0.9986	73	7	10	426	VPTIDVSVVDLTCELEK
41	tr|O96365|O96365_LINPO	Glyceraldehyde-3-phosphate dehydrogenase (Fragment) OS=Lingulodinium polyedrum GN=GAPDH PE=2 SV=1	0.9986	73	7	10	426	IAMKDPEVELKLI
41	tr|O96365|O96365_LINPO	Glyceraldehyde-3-phosphate dehydrogenase (Fragment) OS=Lingulodinium polyedrum GN=GAPDH PE=2 SV=1	0.9986	73	7	10	426	AASGNIIPSSTGAAK
41	tr|O96365|O96365_LINPO	Glyceraldehyde-3-phosphate dehydrogenase (Fragment) OS=Lingulodinium polyedrum GN=GAPDH PE=2 SV=1	0.9986	73	7	10	426	ATTYEEICAEIK
41	tr|O96365|O96365_LINPO	Glyceraldehyde-3-phosphate dehydrogenase (Fragment) OS=Lingulodinium polyedrum GN=GAPDH PE=2 SV=1	0.9986	73	7	10	426	GLM[147]TTIHAM[147]TASQPTVDSASK
41	tr|O96365|O96365_LINPO	Glyceraldehyde-3-phosphate dehydrogenase (Fragment) OS=Lingulodinium polyedrum GN=GAPDH PE=2 SV=1	0.9986	73	7	10	426	IAM[147]KDPEVELK
41	tr|O96365|O96365_LINPO	Glyceraldehyde-3-phosphate dehydrogenase (Fragment) OS=Lingulodinium polyedrum GN=GAPDH PE=2 SV=1	0.9986	73	7	10	426	AGIM[147]LDPTFVK
41	tr|O96365|O96365_LINPO	Glyceraldehyde-3-phosphate dehydrogenase (Fragment) OS=Lingulodinium polyedrum GN=GAPDH PE=2 SV=1	0.9986	73	7	10	426	AGIMLDPTFVK
41	tr|O96365|O96365_LINPO	Glyceraldehyde-3-phosphate dehydrogenase (Fragment) OS=Lingulodinium polyedrum GN=GAPDH PE=2 SV=1	0.9986	73	7	10	426	GLM[147]TTIHAM[147]TASQPTVDSASKK
41	tr|O96365|O96365_LINPO	Glyceraldehyde-3-phosphate dehydrogenase (Fragment) OS=Lingulodinium polyedrum GN=GAPDH PE=2 SV=1	0.9986	73	7	10	426	GKLTGM[147]AFR
41	tr|O96365|O96365_LINPO	Glyceraldehyde-3-phosphate dehydrogenase (Fragment) OS=Lingulodinium polyedrum GN=GAPDH PE=2 SV=1	0.9986	73	7	10	426	LTGM[147]AFR
41	tr|O96365|O96365_LINPO	Glyceraldehyde-3-phosphate dehydrogenase (Fragment) OS=Lingulodinium polyedrum GN=GAPDH PE=2 SV=1	0.9986	73	7	10	426	IAM[147]KDPEVELK
41	tr|O96365|O96365_LINPO	Glyceraldehyde-3-phosphate dehydrogenase (Fragment) OS=Lingulodinium polyedrum GN=GAPDH PE=2 SV=1	0.9986	73	7	10	426	LSGAAAR
41	tr|O96365|O96365_LINPO	Glyceraldehyde-3-phosphate dehydrogenase (Fragment) OS=Lingulodinium polyedrum GN=GAPDH PE=2 SV=1	0.9986	73	7	10	426	TAAPLER
41	tr|O96365|O96365_LINPO	Glyceraldehyde-3-phosphate dehydrogenase (Fragment) OS=Lingulodinium polyedrum GN=GAPDH PE=2 SV=1	0.9986	73	7	10	426	IVFSAPA
41	tr|O96365|O96365_LINPO	Glyceraldehyde-3-phosphate dehydrogenase (Fragment) OS=Lingulodinium polyedrum GN=GAPDH PE=2 SV=1	0.9986	73	7	10	426	DYLAYM[147]M[147]K
41	tr|O96365|O96365_LINPO	Glyceraldehyde-3-phosphate dehydrogenase (Fragment) OS=Lingulodinium polyedrum GN=GAPDH PE=2 SV=1	0.9986	73	7	10	426	ALVIDGLK
41	tr|O96365|O96365_LINPO	Glyceraldehyde-3-phosphate dehydrogenase (Fragment) OS=Lingulodinium polyedrum GN=GAPDH PE=2 SV=1	0.9986	73	7	10	426	AASGNII
41	tr|O96365|O96365_LINPO	Glyceraldehyde-3-phosphate dehydrogenase (Fragment) OS=Lingulodinium polyedrum GN=GAPDH PE=2 SV=1	0.9986	73	7	10	426	GVTSESAQVS
41	tr|O96365|O96365_LINPO	Glyceraldehyde-3-phosphate dehydrogenase (Fragment) OS=Lingulodinium polyedrum GN=GAPDH PE=2 SV=1	0.9986	73	7	10	426	YDTIHGK
41	tr|O96365|O96365_LINPO	Glyceraldehyde-3-phosphate dehydrogenase (Fragment) OS=Lingulodinium polyedrum GN=GAPDH PE=2 SV=1	0.9986	73	7	10	426	RSEGDMK
41	tr|O96365|O96365_LINPO	Glyceraldehyde-3-phosphate dehydrogenase (Fragment) OS=Lingulodinium polyedrum GN=GAPDH PE=2 SV=1	0.9986	73	7	10	426	EICAEIK
41	tr|O96365|O96365_LINPO	Glyceraldehyde-3-phosphate dehydrogenase (Fragment) OS=Lingulodinium polyedrum GN=GAPDH PE=2 SV=1	0.9986	73	7	10	426	LINASYDA
